# Supplementary material for: Evaluating the population impact of hepatitis C direct acting antiviral treatment as prevention for people who inject drugs (EPIToPe) – a natural experiment (protocol)
Source: PubMed Central journal article supplement (PMC6773339; doi:10.1136/bmjopen-2019-029538), 2019-09-24

# BMJ Open

BMJ Open is committed to open peer review. As part of this commitment we make the peer review history of every article we publish publicly available.

When an article is published we post the peer reviewers' comments and the authors' responses online. We also post the versions of the paper that were used during peer review. These are the versions that the peer review comments apply to.

The versions of the paper that follow are the versions that were submitted during the peer review process. They are not the versions of record or the final published versions. They should not be cited or distributed as the published version of this manuscript.

BMJ Open is an open access journal and the full, final, typeset and author-corrected version of record of the manuscript is available on our site with no access controls, subscription charges or pay-per-view fees (<http://bmjopen.bmj.com>).

If you have any questions on BMJ Open's open peer review process please email [info.bmjopen@bmj.com](mailto:info.bmjopen@bmj.com)

# BMJ Open

## Evaluating the Population Impact of Hepatitis C Direct Acting Antiviral Treatment as Prevention for People Who Inject Drugs (EPIToPe) – a natural experiment

|                               |                                                                                                                                                                                                                                                                                                                                                                                                                                                                                                                                                                                                                                                                                                                                                                                                                                                                                                                                                                                                                                                                                                                                                                                                                                                                                                                                                                                                                                                                                                                                                                                                                                                                                                                                                                                                                                                                                                                                                                                                                                                                        |
|-------------------------------|------------------------------------------------------------------------------------------------------------------------------------------------------------------------------------------------------------------------------------------------------------------------------------------------------------------------------------------------------------------------------------------------------------------------------------------------------------------------------------------------------------------------------------------------------------------------------------------------------------------------------------------------------------------------------------------------------------------------------------------------------------------------------------------------------------------------------------------------------------------------------------------------------------------------------------------------------------------------------------------------------------------------------------------------------------------------------------------------------------------------------------------------------------------------------------------------------------------------------------------------------------------------------------------------------------------------------------------------------------------------------------------------------------------------------------------------------------------------------------------------------------------------------------------------------------------------------------------------------------------------------------------------------------------------------------------------------------------------------------------------------------------------------------------------------------------------------------------------------------------------------------------------------------------------------------------------------------------------------------------------------------------------------------------------------------------------|
| Journal:                      | <i>BMJ Open</i>                                                                                                                                                                                                                                                                                                                                                                                                                                                                                                                                                                                                                                                                                                                                                                                                                                                                                                                                                                                                                                                                                                                                                                                                                                                                                                                                                                                                                                                                                                                                                                                                                                                                                                                                                                                                                                                                                                                                                                                                                                                        |
| Manuscript ID                 | bmjopen-2019-029538                                                                                                                                                                                                                                                                                                                                                                                                                                                                                                                                                                                                                                                                                                                                                                                                                                                                                                                                                                                                                                                                                                                                                                                                                                                                                                                                                                                                                                                                                                                                                                                                                                                                                                                                                                                                                                                                                                                                                                                                                                                    |
| Article Type:                 | Protocol                                                                                                                                                                                                                                                                                                                                                                                                                                                                                                                                                                                                                                                                                                                                                                                                                                                                                                                                                                                                                                                                                                                                                                                                                                                                                                                                                                                                                                                                                                                                                                                                                                                                                                                                                                                                                                                                                                                                                                                                                                                               |
| Date Submitted by the Author: | 14-Feb-2019                                                                                                                                                                                                                                                                                                                                                                                                                                                                                                                                                                                                                                                                                                                                                                                                                                                                                                                                                                                                                                                                                                                                                                                                                                                                                                                                                                                                                                                                                                                                                                                                                                                                                                                                                                                                                                                                                                                                                                                                                                                            |
| Complete List of Authors:     | <p>Hickman, M; Bristol<br/> Dillon, John; University of Dundee Division of Cardiovascular and Diabetes Medicine, Liver Group<br/> Elliott, Lawrie; Glasgow Caledonian University, Department of Nursing and Community Health<br/> De Angelis, Daniela; MRC Biostatistics Unit<br/> Vickerman, Peter; London School of Hygiene and Tropical Medicine; University of Bristol, School of Social and Community Medicine<br/> Foster, Graham; Barts and The London School of Medicine<br/> Donnan, Peter; University of Dundee, Dundee Epidemiology and Biostatistics Unit<br/> Eriksen, Ann; Tayside Health Board<br/> Flowers, Paul; Glasgow Caledonian University,<br/> Goldberg, David; Health Protection Scotland<br/> Hollingworth, William; University of Bristol, School of Social and Community Medicine<br/> Ijaz, Samreen; Public Health England Centre for Infection<br/> Liddell, David; Scottish Drugs Forum<br/> Mandal, Sema; Public Health England, Immunisation, Hepatitis, Blood Safety and Countermeasures Response; National Institute for Health Research Health Protection Unit<br/> Martin, Natasha; University of California, San Diego<br/> Beer, Lewis; University of Dundee, Tayside Clinical Trials Unit<br/> Drysdale, Kate; Barts Health NHS Trust<br/> Fraser, Hannah; University of Bristol, School of Social and Community Medicine<br/> Glass, Rachel; Public Health England, Immunisation, Hepatitis, Blood Safety and Countermeasures Response<br/> Graham, Lesley; ISD Scotland<br/> Gunson, Rory; Gartnavel General Hospital, West Of Scotland Specialist Virology Centre<br/> Hamilton, Emma; Scottish Drug Forum<br/> Harris, Helen; Public Health England, Immunisation, Hepatitis, Blood Safety and Countermeasures Response<br/> Harris, Magdalena; London School of Hygiene and Tropical Medicine, Centre for Research on Drugs and Health Behaviours<br/> Harris, Ross; Public Health England, Immunisation, Hepatitis, Blood Safety and Countermeasures Response<br/> Heinsbroek, Ellen; Public Health England Colindale</p> |

|           |                                                                                                                                                                                                                                                                                                                                                                                                                                                                                                                                                                                                                                                                                                                                                                                                                                                                                                                                                                                                                                                                                                                                                                                                                                                                                                                                                                                                                                                                                                                                                                                                                                                                                                                                                                                                |
|-----------|------------------------------------------------------------------------------------------------------------------------------------------------------------------------------------------------------------------------------------------------------------------------------------------------------------------------------------------------------------------------------------------------------------------------------------------------------------------------------------------------------------------------------------------------------------------------------------------------------------------------------------------------------------------------------------------------------------------------------------------------------------------------------------------------------------------------------------------------------------------------------------------------------------------------------------------------------------------------------------------------------------------------------------------------------------------------------------------------------------------------------------------------------------------------------------------------------------------------------------------------------------------------------------------------------------------------------------------------------------------------------------------------------------------------------------------------------------------------------------------------------------------------------------------------------------------------------------------------------------------------------------------------------------------------------------------------------------------------------------------------------------------------------------------------|
|           | <p>Hope, Vivian; Liverpool John Moores University<br/> Horwood, Jeremy; University of Bristol, UK, School of Social and Community Medicine<br/> Inglis, Sarah; University of Dundee, Division of Neuoscience; University of Dundee, Tayside Clinical Trials Unit<br/> Innes, Hamish; Glasgow Caledonian University, School of health and life sciences<br/> Lane, Athene; University of Bristol, School of Social and Community Medicine<br/> Meadows, Jade; University of Bristol School of Social and Community Medicine<br/> McAuley, Andrew; NHS Health Scotland<br/> Metcalf, Chris; University of Bristol, Social Medicine<br/> Migchelsen, Stephanie; Public Health England, Immunisation, Hepatitis, Blood Safety and Countermeasures Response<br/> Murray, Alex; Scottish Drug Forum<br/> Myring, Gareth; University of Bristol School of Social and Community Medicine<br/> Palmateer, Norah E.; Hlth Protect Scotland, Blood-borne viruses and sexually transmitted infections; Glasgow Caledonian University,<br/> Presanis, Anne; Institute of Public Health, MRC Biostatistics Unit<br/> Ramsay, Mary; Public Health England, immunisation; London School of Hygiene and Tropical Medicine, Epidemiology<br/> Samartsidis, Pantelis; MRC Biostatistics Unit<br/> Simmons, Ruth; Public Health England,<br/> Sinka, Katy; Public Health England, Immunisation, Hepatitis, Blood Safety and Countermeasures Response<br/> Vojt, Gabriele; Glasgow Caledonian University<br/> Ward, Zoe; Bristol, Population Health Sciences, Bristol Medical School<br/> Whiteley, David; Edinburgh Napier University<br/> Yeung, Alan; Glasgow Caledonian University<br/> Hutchinson, Sharon; Health Protection Scotland, ; Glasgow Caledonian University, School of Health and Life Sciences</p> |
| Keywords: | <p>Hepatology &lt; INTERNAL MEDICINE, INFECTIOUS DISEASES,<br/> Epidemiology &lt; INFECTIOUS DISEASES, PUBLIC HEALTH, Public health<br/> &lt; INFECTIOUS DISEASES, Infection control &lt; INFECTIOUS DISEASES</p>                                                                                                                                                                                                                                                                                                                                                                                                                                                                                                                                                                                                                                                                                                                                                                                                                                                                                                                                                                                                                                                                                                                                                                                                                                                                                                                                                                                                                                                                                                                                                                              |
|           |                                                                                                                                                                                                                                                                                                                                                                                                                                                                                                                                                                                                                                                                                                                                                                                                                                                                                                                                                                                                                                                                                                                                                                                                                                                                                                                                                                                                                                                                                                                                                                                                                                                                                                                                                                                                |

SCHOLARONE™  
Manuscripts

1  
2  
3  
4  
5  
6  
7  
8  
9  
10  
11  
12  
13  
14  
15  
16  
17  
18  
19  
20  
21  
22  
23  
24  
25  
26  
27  
28  
29  
30  
31  
32  
33  
34  
35  
36  
37  
38  
39  
40  
41  
42  
43  
44  
45  
46  
47  
48  
49  
50  
51  
52  
53  
54  
55  
56  
57  
58  
59  
60

ISRCTN72038467

**Evaluating the Population Impact of Hepatitis C Direct Acting Antiviral Treatment as Prevention for People Who Inject Drugs (EPIToPe) – a natural experiment**

**Authors:**

Hickman M<sup>1</sup>, Dillon J<sup>2</sup>, Elliott L<sup>3</sup>, De Angelis D<sup>4</sup>, Vickerman P<sup>1</sup>, Foster G<sup>5</sup>, Donnan PT<sup>2</sup>, Eriksen A<sup>6</sup>, Flowers P<sup>3</sup>, Goldberg D<sup>7</sup>, Hollingworth W<sup>1</sup>, Ijaz S<sup>8</sup>, Liddell D<sup>9</sup>, Mandal S<sup>8</sup>, Martin NK<sup>10,1</sup>, Beer L<sup>2</sup>, Drysdale K<sup>5</sup>, Fraser H<sup>1</sup>, Glass R<sup>8</sup>, Graham L<sup>11</sup>, Gunson R<sup>12</sup>, Hamilton E<sup>9</sup>, Harris H<sup>8</sup>, Harris M<sup>13</sup>, Harris R<sup>8</sup>, Heinsbroek E<sup>8</sup>, Hope V<sup>14</sup>, Horwood J<sup>1</sup>, Inglis S<sup>2</sup>, Innes H<sup>3</sup>, Lane A<sup>1</sup>, Meadows, J<sup>1</sup>, McAuley A<sup>7</sup>, Metcalfe C<sup>1</sup>, Migchelsen S<sup>8</sup>, Murray, A<sup>9</sup>, G Myring<sup>1</sup>, Palmateer N<sup>3</sup>, Presanis A<sup>4</sup>, Ramsay M<sup>8</sup>, Samartsidis P<sup>4</sup>, Simmons R<sup>8</sup>, Sinka K<sup>8</sup>, Vojt, G<sup>3</sup>, Ward Z<sup>1</sup>, Whiteley D<sup>15</sup>, Yeung, A<sup>3</sup>, Hutchinson S<sup>3</sup>

Correspondence to: Prof Matthew Hickman; [Matthew.Hickman@bristol.ac.uk](mailto:Matthew.Hickman@bristol.ac.uk)

**Affiliations**

1 Population Health Sciences, Bristol Medical School, University of Bristol

2 University of Dundee

3 Glasgow Caledonian University

4 MRC Biostatistics Unit, University of Cambridge

5 Barts Liver Centre, Queen Mary University of London

6 Tayside Health Board

7 Health Protection Scotland

8 Public Health England

9 Scottish Drug Forum

10 Division of Infectious Diseases and Global Public Health, University of California San Diego

11 Information Services Division, Scotland

12 West of Scotland Specialist Virology Centre, Glasgow Royal Infirmary

13 London School of Hygiene and Tropical Medicine

14 Liverpool John Moores University

15 Edinburgh Napier University

ISRCTN72038467

## Shorter ABSTRACT

### Introduction

Modelling evidence suggests HCV treatment scale-up can substantially reduce HCV prevalence/incidence among PWID. We aim to generate empirical evidence on the effectiveness of HCV “Treatment as Prevention” (TasP) in people who inject drugs (PWID).

### Methods and Analysis

We plan a natural experiment with Tayside, Scotland, as a single intervention site where HCV care pathways are being expanded (including drug treatment clinics, needle & syringe programmes, pharmacies, and prison). Other sites in Scotland and England will act as potential controls. Over two years from 2017/18 500 PWID will be treated in Tayside, which we project will reduce chronic HCV prevalence by 62% (from 26% to 10%) and HCV incidence will fall from 4.2 to 1.4 per 100 person-years.

We will conduct focus groups and interviews with service providers and patients to identify barriers and facilitators in implementing TasP; and conduct longitudinal interviews with 40 PWID to assess whether successful HCV treatment alters perspectives on and engagement with drug treatment and recovery. These qualitative accounts will be compared to outcomes generated from a “virtual cohort” of PWID linking information on HCV treatment with Scottish Drug treatment databases. Trained peer researchers will be involved in data collection and dissemination.

The primary outcome – chronic HCV prevalence in PWID – is measured by the Needle Exchange Surveillance Initiative (NESI) survey in Scotland and the Unlinked Anonymous Monitoring Programme (UAM) in England, conducted at least four times before and three times during and after the intervention. We will adapt Bayesian synthetic control methods to generate the cumulative impact of the intervention on chronic HCV prevalence and incidence. We will use a dynamic HCV transmission and economic model to evaluate the cost-effectiveness of the HCV TasP intervention, and to estimate the contribution of the scale-up in HCV treatment to observed changes in HCV prevalence.

ISRCTN72038467

## Longer ABSTRACT

### Introduction:

Hepatitis C Virus (HCV) is the second most important cause of liver disease in the UK, with injecting drug use the main risk factor among the estimated 200,000 people currently infected. Despite effective prevention interventions, chronic HCV prevalence remains at 40% among people who inject drugs (PWID). New Direct Acting Antiviral (DAA) HCV therapies combine high cure rates (>90%) and short treatment duration (8-12 weeks). Theoretical mathematical modelling evidence suggests HCV treatment scale-up can prevent transmission and substantially reduce HCV prevalence/incidence among PWID. Our primary aim is to generate empirical evidence on the effectiveness of HCV “Treatment as Prevention” (TasP) in PWID.

### Methods and Analysis

We plan to establish a natural experiment with Tayside, Scotland, as a single intervention site where HCV care pathways are being expanded (including specialist drug treatment clinics, needle & syringe programmes (NSPs), pharmacies, and prison) and HCV treatment for PWID is being rapidly scaled-up. Other sites in Scotland and England will act as potential controls. Over two years from 2017/18, 500 PWID will be treated in Tayside, which simulation studies project will reduce chronic HCV prevalence among PWID by 62% (from 26% to 10%) and HCV incidence will fall by approximately 2/3 (from 4.2 per 100 person-years (p100py) to 1.4 p100py). Treatment response and re-infection rates will be monitored. We will conduct focus groups and interviews with service providers and patients that accept and decline treatment to identify barriers and facilitators in implementing TasP. We will conduct longitudinal interviews with up to 40 PWID to assess whether successful HCV treatment alters their perspectives on and engagement with drug treatment and recovery. Trained peer researchers will be involved in data collection and dissemination.

The primary outcome – chronic HCV prevalence in PWID – is measured using information from the Needle Exchange Surveillance Initiative (NESI) survey in Scotland and the Unlinked Anonymous Monitoring Programme (UAM) in England, conducted at least four times before and three times during and after the intervention. We will adapt Bayesian synthetic control methods (also called Causal Inference Models) to generate the cumulative impact of the intervention on chronic HCV prevalence and incidence. We will use a dynamic HCV transmission and economic model to evaluate the cost-effectiveness of the HCV TasP intervention, and to estimate the contribution of the scale up in HCV treatment to observed changes in HCV prevalence. Through the qualitative data we will systematically explore key mechanisms of TasP real world implementation from provider and patient perspectives, to develop a manual for scaling up HCV treatment in other settings. We will compare qualitative accounts of drug treatment and recovery with a “virtual cohort” of PWID linking information on HCV treatment with Scottish Drug treatment databases to test whether DAA treatment improves drug treatment outcomes.

### Ethics and Dissemination

Extending HCV community care pathways is covered by ethics (ERADICATE C, ISRCTN27564683, Super DOT C Trial [clinicaltrials.gov:NCT02706223](http://clinicaltrials.gov/NCT02706223)). Ethical approval for extra data collection from patients including health utilities and qualitative interviews has been granted and ISRCTN registration has been completed. Our findings will have direct NHS and patient relevance; informing

ISRCTN72038467

prioritization given to early HCV treatment for PWID. We will present findings to practitioners and policy makers, and support design of an evaluation of HCV TasP in England.

### Strengths and limitations of this study

1. Our control sites in the rest of Scotland and England were not randomised - but our natural experiment design adapted from synthetic control methods is more robust than simple before and after studies.
2. HCV treatment and prevention strategy in UK (and Europe) is evolving - motivated both by WHO "elimination targets" and falling drug prices – which may contaminate our controls.
3. Our statistical models suggest that we should have sufficient power to detect an intervention effect and can model changes over time.
4. We will develop dynamic transmission and economic models that can estimate cost-effectiveness including the prevention benefit of this intervention.
5. We are conducting multiple nested qualitative studies and training and using peer researchers.

ISRCTN72038467

## Introduction:

Infection with Hepatitis C Virus (HCV) is a progressive disease that over 20-40 years can lead to liver cancer and premature death. HCV is the second most important cause of liver disease in the UK and one of the few causes that is curable<sup>1</sup>. In the UK it is estimated that approximately 200,000 people are infected with HCV, over 85% of whom are people who inject or have injected drugs (PWID)<sup>2-5</sup>. Chronic HCV prevalence and incidence among PWID remains high in UK at 20-50% and 5 to 15 per 100 person- years respectively<sup>4 6-18</sup>. Prevention of HCV transmission among PWID is critical to long-term prevention of HCV related liver disease<sup>19</sup>.

We have reviewed the effectiveness of traditional primary prevention against HCV –opioid substitution treatment (OST) and needle and syringe programmes (NSPs)<sup>12 20-22</sup>. Ongoing exposure to OST and high-coverage NSPs can reduce the risk of HCV transmission by 50-80%<sup>12 22</sup>. In Scotland HCV incidence among PWID decreased from approximately 14 to 6 per 100 person- years from 2008/09 to 2011/12 coinciding with the launch of the Scottish HCV strategy and action plan which incorporated scale-up of harm reduction interventions and HCV treatment<sup>10 23</sup>. We estimated that 60% of this decline could be attributed to the scale-up of OST and NSP during the action plan and that 1,400 HCV infections were averted by 2015<sup>24</sup>. However, there was no appreciable reduction in overall anti-HCV prevalence over this short period, and there is some suggestion that incidence has increased recently to ~10 per 100 person years

(<http://www.hps.scot.nhs.uk/resourcedocument.aspx?id=5863>). HCV transmission models suggest that primary prevention through NSP and OST alone is insufficient to achieve substantial reductions (of the order of 40% or more within ten years) in HCV prevalence among PWID in the UK<sup>25 26</sup>.

Prevention of hepatitis C disease and HCV transmission is now possible because highly effective, tolerable, short-course interferon-free direct acting antiviral therapies (DAAs) are available for all HCV genotypes with cure rates – defined as sustained virological response (SVR)- exceeding 90%<sup>27-29</sup>. We, and others, hypothesise that HCV Treatment scale-up for PWID, and resulting HCV Treatment as Prevention (TasP) could enhance other primary interventions and reduce HCV incidence and chronic prevalence to negligible levels (i.e. towards elimination as a major public health concern)<sup>30-35</sup>. World Health Organization (WHO) targets for HCV elimination, adopted by UK and other countries, aim to reduce HCV incidence by 80% and associated mortality by 65% by 2030<sup>36 37 38 39 40 41</sup>.

Clinical guidelines in Europe and US changed from recommending prioritising HCV treatment to people with moderate to severe liver disease towards removing any restrictions and recommending that people at risk of transmission irrespective of fibrosis stage are offered treatment<sup>42-46</sup>. Cost-effectiveness models that incorporate the population prevention benefit suggest early treatment should be prioritised to PWID over other patient groups (unless chronic HCV prevalence and transmission is very high)<sup>47</sup>. There is direct evidence that SVR following HCV treatment reduces liver disease progression and mortality risk<sup>48-50</sup>, but in two recent reviews we found no empirical evidence that HCV treatment scale-up has reduced chronic HCV prevalence and incidence in PWID populations<sup>51 52</sup>. In part this is because in most settings HCV treatment rates in PWID are too low and any changes generally too small to be detected, as we show in two studies of seven sites in UK<sup>7</sup> and an extension to 11 sites in Europe<sup>53</sup>. Until very recently in the UK, the annual number of HCV DAA treatments was restricted -as drug costs could be expensive (>£10,000 per patient). There is



ISRCTN72038467

1  
2  
3 the opportunity now to test whether scaling up HCV treatment will reduce chronic HCV prevalence  
4 and transmission among PWID<sup>41</sup>.  
5

6 In a pilot study (“Eradicate C”) in Tayside we showed that we can increase HCV case-finding and  
7 engage and successfully treat PWID in the community (Dillon personal communication, Schulkind  
8 under review). Combining further studies on extending community HCV treatment pathways in  
9 Tayside and additional treatments provided by NHS Tayside and Scottish Government we can  
10 establish an immediate natural experiment (with Tayside as the intervention site and other sites in  
11 Scotland and England as controls) to test and generate UK empirical evidence on the and potential  
12 impact and cost-effectiveness of HCV “Treatment as Prevention” (TasP) in people who inject drugs  
13 (PWID).  
14  
15  
16  
17  
18  
19  
20  
21  
22  
23  
24  
25  
26  
27  
28  
29  
30  
31  
32  
33  
34  
35  
36  
37  
38  
39  
40  
41  
42  
43  
44  
45  
46  
47  
48  
49  
50  
51  
52  
53  
54  
55  
56  
57  
58  
59  
60

For peer review only

ISRCTN72038467

## Methods and analysis:

Our intention is to create and conduct a mixed methods study, including qualitative studies and economic evaluation, of a natural experiment of HCV Treatment as Prevention (TasP) among People who Inject Drugs (PWID). We also will develop methods for evaluating HCV TasP.

### Intervention: Scaling-up HCV treatment

The **intervention** comprises the removal of any restrictions on access to treatment by disease stage, expanding opportunities for HCV treatment through multiple community care-pathways, and scaling-up treatment in PWID. By combining support from Scottish Government, National Health Board Tayside (NHS Tayside) and industry (MSD, Gilead, BMS) we can deliver rapid intensive scale-up of HCV treatments for PWID (comprising an extra 400 HCV treatments, a 3.5-fold increase from treatments for PWID prior to April 2017, see sample size below). We have developed multiple integrated community HCV care pathways, including novel care pathways in pharmacies, a low threshold NSP, drug treatment services and prisons (see Figure 1). Our diagnostic pathways make extensive use of dried blood spot (DBS) testing for diagnosis of HCV antibody and chronic HCV with subsequent conventional laboratory testing in preparation for treatment (viral load, liver function and Fib4 fibrosis score)<sup>54-56</sup>. Community HCV specialist nurses (3.5 FTE) will coordinate and deliver case-finding and treatment across the pathways in Tayside (Figure 1).

*Figure 1: Overview of HCV testing and treatment pathways for the PWID population in NHS Tayside.*

Apart from expansion of community HCV care pathways, no new clinical procedures will be investigated and all PWID with chronic HCV will be offered oral DAA HCV treatment compliant with the Scottish clinical guidelines (<https://www.hps.scot.nhs.uk/resourcedocument.aspx?id=6621>). Standard care for patients is to test for SVR at 12 weeks after end of treatment with patients being recommended for annual follow-up if at risk of re-infection. Additionally, ethical approval has been granted to ask patients for permission to be recruited into the qualitative study (below) and extended clinical and behavioural drug history and data on health utilities (EQ5D-5L) at onset of treatment, during treatment and after the end of treatment.

### Outcome – Chronic HCV prevalence in PWID

The **outcome** is chronic HCV prevalence among PWID in the community (not just in the patients who undergo HCV treatment).

The UK is one of few countries worldwide to have an established nationwide surveillance system monitoring HCV infection among PWID<sup>9 12 17 22 57-61</sup>. This is undertaken through a series of cross-sectional voluntary anonymous surveys of PWID recruited at harm reduction services, referred to as the Unlinked Anonymous Monitoring Programme (UAM) in England and Wales and the Needle Exchange Surveillance Initiative (NESI) in Scotland<sup>62 63</sup>. In addition, the UK has established sentinel laboratory surveillance of HCV testing and national monitoring of HCV treatment<sup>8 64-66</sup>.

In our pre-intervention period from 2010/11 to 2016 there have been four NESI surveys in Scotland (n=10,000 participants in total) and six UAM surveys in England (n=16,000 in total), which have involved the collection of DBS linked to questionnaire data. Participants are recruited at sentinel sites by a team of trained interviewers in Scotland (at over 100 NSP sites) and by agency staff in over

ISRCTN72038467

60 low-threshold drug agencies across England<sup>59 62</sup>. Participants complete a short questionnaire, with common questions across UAM and NESI, on demographics, injecting behaviour and service utilisation, and importantly (in relation to quantifying the intervention effect) both survey approaches have remained consistent over time.

The DBS samples collected in NESI and UAM have all been tested for HCV antibody, using the same methods (where sensitivity and specificity of the assay on DBS are close to 100%)<sup>54 55</sup>, and illustrate that antibody prevalence (ever infection) has remained relatively stable among PWID during this time (Figure 2). PCR positivity among antibody positive samples is used to determine chronic infection. All NESI and UAM samples will be tested for HCV antibody and PCR to assess the impact of HCV therapy scale-up – which is critical as trends in chronic infection and antibody status will diverge as more people are cured. In addition, we will undertake PCR testing of all historical samples that were HCV antibody positive shown in Figure 2 so that we can measure chronic HCV prevalence among PWID pre-, as well as post-, intervention for analysis (below)

*Figure 2: Trends in HCV antibody prevalence among PWID in Scotland and England 2010/11-16*

Data on HCV PCR positivity among antibody negative samples identify recent infections and is used to estimate HCV incidence – which has fluctuated between 5-10 infections per 100 person years across the UK during the last five years<sup>62</sup>.

During 2017-22, three waves of data collection for NESI (n=7,500) and five to six for UAM (n=17,000 in England) will measure this outcome.

### **Sample size, Power, and Estimating Intervention Effect**

We updated estimates of the prevalence of PWID in Tayside<sup>5</sup> which suggest there are 2,760 (95% Credible Interval, CrI 2,360-3,170) PWID either currently injecting and/or in OST. We estimate that approximately 30% have chronic HCV and over 75% of PWID with chronic HCV have been diagnosed. Prior to 2017 approximately 66 PWID were treated annually. From April 2017 we plan to treat at least 500 PWID in Tayside over 2 years (as a result of expanded community care pathways shown in Figure 1 and extra HCV treatments provided by NHS, Scottish Government and Industry funding). Adapting a transmission dynamic model that has been used in Tayside,<sup>67</sup> we hypothesize that within two years chronic HCV prevalence among PWID will reduce by approximately 62% from 26% (95% CrI 20-32) to at least 10% and chronic HCV incidence will fall by approximately 2/3s from 4.2 (95% CrI 2.4-7.1) per 100 person-years (p100py) to 1.4 (95%CrI 1.0 – 1.4) p100py (as shown in Figure 3). Modelling also suggests that maintaining these reductions after 2019 will require less than 40 treatments per year.

*Figure 3: Projected chronic HCV prevalence and incidence among PWID in Tayside with and without the intervention. Blue shaded area denotes the 95% credibility intervals of the model projections with and without the intervention*

We selected synthetic control type methods as the most appropriate approach for evaluating HCV TasP intervention effects in a natural experiment – given that the outcome – chronic HCV in PWID -

ISRCTN72038467

is measured over time in the pre-intervention period and data on multiple control sites (as shown in Figure 2) that have not been exposed to the intervention are available. The original synthetic control method<sup>68 69 70</sup> is limited and does not fully exploit the temporal characteristics of the outcome. We will, therefore, adapt an alternative approach, the “causal impact method” (CIM) proposed by Brodersen and colleagues<sup>71 72</sup>. In the CIM a time series model is formulated of the outcome in the treated site at each time point in terms of previous outcomes and a regression component with covariates related to the outcomes in the control sites. In this way both the temporal correlation of the outcome within the intervention site and with control units are accounted for. The model is estimated in a Bayesian framework using data from the pre-intervention period. The estimated parameters are then used, together with information on outcomes in the control units after the intervention, to forecast the outcome for the treated site post-intervention, i.e. chronic HCV prevalence in the absence of the intervention with the intervention effect as the cumulative difference between the observed outcome and the counterfactual. In our case, this would correspond to the difference in chronic HCV prevalence among PWID between the synthetic control estimated prevalence and the observed prevalence after the intervention.

We have performed simulation studies to test power and evaluate the utility of the CIM assuming information on chronic HCV prevalence among PWID (shown in Figure 4). Provided trends in the chronic HCV prevalence in the pre-intervention period are relatively stable (which is the case) there will be sufficient power to detect the projected reduction in chronic prevalence. For example, in Figure 4d we see that for a prevalence reduction of 40% by year 2-3 the credible intervals of the estimated cumulative effect (cumulative drop in prevalence) exclude zero, correctly identifying evidence of a successful intervention. Whereas a cumulative reduction of <20% is unlikely to be detected.

*Figure 4: Causal Impact Synthetic Control Method (CIM) simulation and estimated intervention effects and 95% Credible Intervals for a range of assumed effects.*

*Footnote:- Illustration of CIM. First subplot shows a single dataset, where solid lines represent the simulated prevalence in the absence of the intervention, and the dashed lines represent the outcome of treated site in the post intervention period under different intervention magnitude scenarios. For each one of the three scenarios, we calculate the estimated average intervention effect along with credible intervals. These are shown in Subplots 2-4. We see that as the effect increases, the intervals tend to move away for zero. However, the intervention effect only becomes significant in scenario 3, where zero is not included in any of the post-intervention time points.*

### **Qualitative Studies:**

Historically it has proven very hard to engage PWID in HCV treatment<sup>73-76</sup>. Some barriers to engagement, such as poor efficacy or fear of interferon treatment side-effects, may be ameliorated by DAA therapy. However, other barriers such as mistrust of health services, stigma, and competing priorities faced by PWID may persist. In addition, providers may be reticent to refer or provide HCV treatment to PWID due to concerns about adherence, reinfection and perceptions of treatment ‘worth’<sup>77 78</sup>. It is expected that co-locating HCV treatment within existing services will reduce many system and provider level barriers to PWID accessing care<sup>73-75 79-84</sup>. However, this has not been tested in the context of community wide scale-up of interventions across multiple potential pathways (Figure 1). It is critical, therefore, that we understand how HCV TasP is embedded within the existing service landscape and incorporated into providers’ professional roles. In addition, we will use qualitative studies to assess whether successful HCV treatment impacts on reduction or

1 ISRCTN72038467

2  
3 cessation of drug use, safer injecting practices and improvements in social relationships<sup>85</sup> (secondary  
4 outcome below).

5  
6 **Understanding the barriers and facilitators to scaling-up community-based HCV treatment**

7 The qualitative study design has two distinct arms focusing on the intervention providers, and the  
8 intervention recipients.

9  
10  
11 *Intervention providers*

12 A purposive sample of 30 intervention providers, comprising nursing leads and key individuals from  
13 collaborating organisations will be approached directly by the lead hepatitis nurse. Seven focus  
14 groups will be convened according to professional role and locality:

- 15  
16 • HCV healthcare specialists (nurses and physicians)  
17 • Community pharmacists  
18 • Prison staff (both healthcare and security)  
19 • 'Drug workers' (from OST and NSP services)

20  
21 Each focus group will consist of a maximum of six individuals and ideally comprise multi-agency  
22 mixed groups. Individual interviews by telephone will be offered for those hesitant to join a group  
23 (estimate 10 interviews). Topic guides informed by previous work in this area<sup>73 75 83 86</sup> will facilitate  
24 group discussion.

25  
26  
27 *Intervention recipients – cross-sectional and longitudinal*

28 The intervention recipient arm of the study will comprise both cross-sectional and longitudinal  
29 elements. A cross-sectional approach will be employed to recruit 6-10 participants who do not take  
30 up the offer of treatment. These individuals will be recruited through the treatment pathways or  
31 through our peer researcher networks. The longitudinal element will follow a cohort of up to 40  
32 individuals recruited following their course of HCV treatment. These individuals will be purposively  
33 sampled from the existing services in which HCV TasP has been embedded (i.e. pharmacy, prison and  
34 drug service), and then followed-up at one year post-treatment (with 70% expected to be followed-  
35 up)<sup>87</sup>. We aim to recruit women as well as men, younger and older people; those treated previously  
36 and first time; those injecting and not injecting at treatment onset. Follow-up interviews will explore  
37 collateral effects of HCV TasP including outcomes pertaining to drug use and injecting practices  
38 (secondary outcome below).

39  
40  
41 Participants will be recruited by hepatitis nurses or other clinical staff in Tayside and the face-to-face  
42 semi-structured interview will be conducted by peer-researchers, trained and guided by experienced  
43 qualitative researchers (<https://www.youtube.com/watch?v=9ZZo3fkOXlg>)

44  
45 <sup>88 89</sup>. The Scottish Drugs Forum (SDF) works with a group of Tayside peer-researchers with lived  
46 experience of injecting. Peer-researchers will receive study-orientated training and be provided  
47 with ongoing support to co-produce data and contribute to study outputs. A £20 shopping voucher  
48 will be offered to all interviewees except those in prison (Scottish prison service ethics did not  
49 permit thank you vouchers to prison participants).

50  
51  
52 *Qualitative Data Analysis*

53 Interviews and focus-groups will be audio-recorded using encrypted digital voice recorders,  
54 transcribed verbatim and anonymised. *Nvivo* v.10 software will be used to code and manage  
55 qualitative data. First level analysis will be deductive, guided by the research questions, and peer  
56 researchers will be consulted for input and feedback during the analytical process<sup>90</sup>. A constant  
57 comparison method will be used to develop the thematic analysis and will reflect diverging and  
58 converging narratives, for example, across groups of intervention recipients at different time points  
59 in the treatment pathway, or between groups of intervention providers<sup>90</sup>. The findings will be  
60

1  
2  
3  
4  
5  
6  
7  
8  
9  
10  
11  
12  
13  
14  
15  
16  
17  
18  
19  
20  
21  
22  
23  
24  
25  
26  
27  
28  
29  
30  
31  
32  
33  
34  
35  
36  
37  
38  
39  
40  
41  
42  
43  
44  
45  
46  
47  
48  
49  
50  
51  
52  
53  
54  
55  
56  
57  
58  
59  
60

ISRCTN72038467

contextualised in the relevant theoretical perspectives which may include the diffusion of preventive innovations (staff) or social norms and values that might underpin health behaviour (recipients)<sup>91,92</sup>. We will assess TasP both from the providers' perspective and from patients' perspective including those who refuse treatment.

We will use the findings iteratively to update the HCV TasP logic model shown in Figure 5. Our qualitative data will be used to generate a manual of an optimal intervention for other sites in UK. The Behaviour Change Wheel<sup>92</sup> will be used retrospectively to analyse the success and failure of implementation within Tayside and then prospectively to formulate the optimal implementation intervention.

*Figure 5: Preliminary Logic Model HCV Treatment as Prevention (EPIToPe)*

### **Mixed Method Study on drug use outcomes: OST retention, drug overdose, recovery, and social transformation**

It has been hypothesised that successful HCV treatment in PWID may positively impact on understandings of self and identity and improve treatment of drug use disorders<sup>78 79 85 93 94</sup>. Accounts of 'transformative' outcomes extending beyond viral clearance alone include reference to reductions in drug and alcohol use, uptake of safer injecting practices, improved social relationships, enhanced sense of responsibility and self-worth (Harris personal communication, under review). Hints of such collateral or indirect benefits are also found in quantitative studies reporting low re-infection rates and reductions in risky injecting behaviours among treated PWID<sup>95 96</sup>. In our qualitative follow-up study we will describe accounts of drug treatment experience, injecting risk and self-concept in PWID who have been successfully treated and compare the findings to quantitative data generated from a virtual cohort.

Health Protection Scotland (HPS) link data on diagnostic HCV tests in the four largest Scottish NHS boards (including Tayside)<sup>8</sup> and all persons undergoing HCV treatment in the Scottish HCV Clinical database<sup>97</sup> which are also linked with other databases (including deaths, hospitalisations and drug treatment)<sup>8 39 98-100</sup> and from 2018 Scotland's Prescribing Information System (PIS) which holds data on OST and NHS prison health database (Prison Vision)<sup>101-105</sup>. PWID attending drug services who were HCV diagnosed, compared to those who were not, are at increased risk of drug-related and other cause-specific morbidity/mortality<sup>106 107</sup>. Thus, we will create a virtual cohort of chronic HCV infected PWID (estimated to involve at least 600 individuals from Tayside and 3,000 from elsewhere) and through linkage identify those who have been treated and attained SVR with those who have not. We will assess and compare the following outcomes:- retention in drug treatment (determined through linkage to drug treatment and prescribing databases), drug- and alcohol- related morbidity/mortality (through linkage to all hospital admission and mortality databases), and other markers of relapse (through linkage to prisons database).

### **Economic and impact evaluation**

Infectious disease models can test the extent to which observed changes in disease transmission can be attributed to specific interventions,<sup>108-112</sup> and assess cost-effectiveness of interventions that avert secondary infections, i.e. have a population prevention benefit<sup>47 56 113-117</sup>. We will update and adapt a transmission model of HCV among PWID in Scotland and Tayside to model the impact of the HCV treatment intervention based on historical trends and new observations collected as part of this programme<sup>36 67</sup>. We will stratify the PWID population into current (injected in the previous year) and temporarily ceased (in OST and not injected in the previous year); as well as by duration of

ISRCTN72038467

1  
2  
3 injecting (< 3 years, 3 to 9 years, 10+ years since onset), prevention intervention exposure (OST  
4 and/or high coverage NSP), and intervention settings for testing and treatment. We will use  
5 Approximate Bayesian Computation to calibrate the model to pre-intervention trends in chronic HCV  
6 prevalence and incidence among PWID in Tayside. The model will simulate the impact of observed  
7 rates of HCV treatment and cure rates for the intervention period, also incorporating any changes in  
8 the coverage of OST and NSP and injecting risk behaviours.  
9

10  
11 We will test consistency between the model impact projections and observed changes in HCV  
12 chronic prevalence and incidence from Tayside to disentangle the impact of HCV TasP from other  
13 interventions (OST/NSP) or epidemiological changes, and predict the impact of the TasP on number  
14 of HCV infections averted. If they are not consistent then alternative evidence-based hypotheses will  
15 be tested for why the model projects a different impact and the best fitting models will then be used  
16 to project the impact of the intervention. This will be assessed compared to two alternative  
17 counterfactuals where treatment rates are either at pre-scale-up levels in Tayside or at the average  
18 level achieved in other UK sites over the scale-up period. The impact of any changes in OST and NSP  
19 coverage will also be assessed to determine the contribution of those changes on observed effects.  
20 Impact will be assessed in terms of the relative decrease in prevalence and incidence, as well as the  
21 number and percent of infections averted in the intervention model projections compared to each  
22 counterfactual over different time frames. These model projections can also be taken forward to  
23 evaluate the possible impact of the intervention over next 5 or 10 years.  
24  
25

26  
27 We will evaluate the cost-effectiveness of the intervention (HCV treatment scale-up) compared to  
28 status quo (expected rate of HCV case-finding and treatment among PWID in the rest of the UK)  
29 from a health care provider (NHS) perspective, with the cost-effectiveness of the different settings  
30 where case-finding occurs also being assessed. The cost-effectiveness (CE) model will be based on  
31 the same dynamic impact model, adapted to include HCV disease progression stages and tracking of  
32 health outcomes among PWID after cessation of injecting<sup>47</sup>. The economic evaluation will  
33 incorporate both individual benefits of HCV treatment (on disease progression) as well as population  
34 benefits (on HCV transmission). We will calculate the total number of infections and deaths over a  
35 50-year time horizon for the intervention and counterfactual scenario and estimate the costs and  
36 quality-adjusted life years (QALYs) based on the number of individuals in each disease stage per year  
37 in the model. We will discount all future costs and QALYs at 3.5% (NICE guidelines  
38 [https://www.nice.org.uk/process/pmg9/resources/guide-to-the-methods-of-technology-appraisal-  
39 2013-pdf-2007975843781](https://www.nice.org.uk/process/pmg9/resources/guide-to-the-methods-of-technology-appraisal-2013-pdf-2007975843781)). Probabilistic sensitivity analyses will be used to estimate the parametric  
40 uncertainty in the impact and cost projections. Cost-effectiveness results will be expressed in terms  
41 of incremental cost-effectiveness ratios (ICERs) and net monetary benefits (NMB) estimated using  
42 NICE thresholds (£20,000 and £30,000 per QALY). We will plot cost-effectiveness acceptability  
43 curves to determine the probability of the intervention being cost-effective compared to different  
44 willingness-to-pay thresholds. Analyses of covariance (ANCOVA) methods will be used to summarize  
45 the proportion of the variability in the incremental costs and QALYs explained by uncertainty in  
46 different input parameters. Univariate sensitivity analyses will consider the effect of changes in  
47 important parameters such as time horizon, treatment cost and discount rate.  
48  
49

50  
51 We focus on the incremental or additional resource costs associated with the intervention in  
52 Tayside. These costs, in part based on our earlier work for other studies, will include such things as  
53 the nurse time spent on intervention related activities (training other staff to offer HCV testing and  
54 treatment referral) as well as additional HCV testing and treatment costs, any additional OST costs  
55 due to HCV testing or treatment, and other staff time at the NSP, drug treatment centres and  
56 prisons involved with the intervention. Most of the incremental costs can be defined as variable  
57 (driven by extra nurse time and HCV testing/treatment costs). NHS HCV care costs and health  
58 utilities will be attached to each disease stage, based primarily on previous syntheses and models,  
59  
60

1  
2  
3  
4  
5  
6  
7  
8  
9  
10  
11  
12  
13  
14  
15  
16  
17  
18  
19  
20  
21  
22  
23  
24  
25  
26  
27  
28  
29  
30  
31  
32  
33  
34  
35  
36  
37  
38  
39  
40  
41  
42  
43  
44  
45  
46  
47  
48  
49  
50  
51  
52  
53  
54  
55  
56  
57  
58  
59  
60

ISRCTN72038467

which assume that PWID have a lower QoL than non-PWID of a similar age, gender and liver disease stage<sup>118-120</sup>. Additional data using the EQ-5D-5L tool during this study will generate new health utility data on the QoL amongst PWID before and after DAA treatment.

### ***Patient and Public Involvement***

Patient and Public Involvement (PPI) was led by the Hepatitis C Trust and supported by qualitative research assessing barriers and facilitators to HCV treatment access (led by Magdalena Harris). The Scottish Drug Forum (SDF) were also actively involved in the development of EPIToPe. The input from PPI groups has influenced the design of care pathways and has ensured that peer research is an essential element of the qualitative strand of EPIToPe.

A pilot NIHR funded study in England (HEPCAT) responding to NICE Guidance on Hepatitis Case Finding was co-designed with Hepatitis C trust. It showed that Hepatitis C Facilitators and peer support networks can increase the uptake of HCV case-finding and HCV treatment readiness in addiction services. This pilot study and our studies in Dundee/Tayside will influence how HCV treatment can be scaled up in England and our proposed evaluation HCV treatment as prevention.

Peer researchers will be trained to conduct the longitudinal study with PWID treated for HCV and will be involved and contribute to the analysis of the findings. Peer researchers and SDF will be members of the project management group and steering committee.

Dissemination events will be held in Dundee to discuss and present the findings from the qualitative studies with patient groups and services. These will be facilitated by SDF to support active contribution from our peer researchers. The study findings will be summarised and promoted through SDF website, social media platforms and through their sector-wide conferences in Scotland. Hepatitis Scotland, who are hosted within SDF, together with patient and public groups in England will take an active role in the wider national and international dissemination of the research, its translation into patient meaningful materials and its integration into a national policy context. The research will also be promoted via Hepatitis C Trust and Public Health England.

### ***Future Study: Natural experiment of TasP in England***

In England HCV treatment is delivered through 22 operational delivery networks (ODNs). NHS England's HCV strategy (2016-2019) prioritised 10,000 patients per year in line with the declared priorities of the network which could (and in many cases did) include people who use drugs at risk of transmission<sup>41</sup>. In October 2018 it is anticipated that a new procurement deal will substantially increase the number of patients who can access DAAs and this will enable 'trace and treat' options to be introduced. We will use the first part of EPIToPe including the manual generated by the qualitative study, enhancements to historical and ongoing surveillance of chronic HCV in PWID, infectious disease models, and methodological developments of causal impact model, to co-design with ODN leads a natural experiment of HCV TasP in England.



1  
2  
3  
4  
5  
6  
7  
8  
9  
10  
11  
12  
13  
14  
15  
16  
17  
18  
19  
20  
21  
22  
23  
24  
25  
26  
27  
28  
29  
30  
31  
32  
33  
34  
35  
36  
37  
38  
39  
40  
41  
42  
43  
44  
45  
46  
47  
48  
49  
50  
51  
52  
53  
54  
55  
56  
57  
58  
59  
60

ISRCTN72038467

### Authors' contributions:

All authors contributed to editing of the manuscript.

M Hickman (MH) and S Hutchinson (SH) are co-PIs of EPIToPe and prepared first draft of the manuscript.

J Dillon (JD) leads intervention scale-up in Tayside in collaboration with Tayside CTU (PT Donnan (PTD), S Inglis (SI)) and A Eriksen (AE).

L Elliot (LE) leads qualitative component of EPIToPe in collaboration with Scottish Drug Forum (D Liddell (DL), R Moore (RM)) and support from M Harris (MHa) and D Whitely (DW) on qualitative research and training of peer support workers, and P Flowers (PF) on behavioural science.

D De Angelis (DA) leads synthetic control estimation and multiple parameter evidence synthesis in collaboration with P Samartsidis (PS), R Harris (RA), A Presanis (AP), and N Martin (NM).

P Vickerman (PV) leads dynamic impact and economic modelling in collaboration with NM, Z Ward (ZW), H Fraser (HF) with health economics led by W Hollingworth (WH) as part of Bristol Randomised Trial Collaboration (BRTC) with advice on trial design from J Horwood (JH), C Metcalfe (CM) and A Lane (AL).

G Foster (GF) is leading design of evaluation in England based on EPIToPe with support from BRTC and K Drysdale

SH is leading on outcome measurement in Scotland with Health Protection Scotland (D Goldberg (DG), A McAuley (AMc)), and in collaboration with L Graham (LG) from ISD, R Gunson (RG), H Innes (HI), N Palmateer (NP).

S Mandal (SM) and S Ijaz (SI) are leading on outcome measurement in England with H Harris (HH), V Hope (VH), S Mighelsen (SM), M Ramsay (MR), R Simmons (RS), K Sinka (SK).

**Funding statement:** 'This paper presents independent research funded by the National Institute for Health Research (NIHR) under its Programme Grants for Applied Research Programme (Reference Number RP-PG-0616-20008). The views expressed are those of the author(s) and not necessarily those of the NHS, the NIHR or the Department of Health.'

In addition, we acknowledge support from NIHR Health Protection Research Unit in Evaluation, and the Bristol Randomised Trials Collaboration (BRTC), a UKCRC Registered Clinical Trials Unit in receipt of NIHR Clinical Trials Units (CTU) support funding. The views expressed are those of the author and not necessarily those of the NHS, the NIHR or the Department of Health and Social Care. NM is supported by the National Institute for Drug Abuse [grant number R01 DA037773] and the University of California San Diego Center for AIDS Research (CFAR), a National Institute of Health (NIH) funded program [grant number P30 AI036214].

We would like to thank all those involved in PPI from both SDF and the Hepatitis C Trust.

### Competing interests statement.

MH has received unrestricted honoraria for presenting at meetings from Abbvie, Gilead, MSD. NM has received unrestricted research grants and honoraria from Gilead and Merck. PV has received unrestricted honoraria for presenting at meetings from Abbvie and Gilead. PV has received unrestricted research grants from Gilead.

1  
2  
3  
4  
5  
6  
7  
8  
9  
10  
11  
12  
13  
14  
15  
16  
17  
18  
19  
20  
21  
22  
23  
24  
25  
26  
27  
28  
29  
30  
31  
32  
33  
34  
35  
36  
37  
38  
39  
40  
41  
42  
43  
44  
45  
46  
47  
48  
49  
50  
51  
52  
53  
54  
55  
56  
57  
58  
59  
60

ISRCTN72038467

**PTD has received unrestricted grants from Shire pharmaceuticals, Novo Nordisk and Gilead and is a member of the Scottish Medicines Consortium. HF has received an honorarium from MSD.**

For peer review only

ISRCTN72038467

## References

1. Williams R, Aspinall R, Bellis M, et al. Addressing liver disease in the UK: a blueprint for attaining excellence in health care and reducing premature mortality from lifestyle issues of excess consumption of alcohol, obesity, and viral hepatitis. *Lancet* 2014;384(9958):1953-97. doi: 10.1016/S0140-6736(14)61838-9
2. De Angelis D, Sweeting M, Ades A, et al. An evidence synthesis approach to estimating Hepatitis C prevalence in England and Wales. *Stat Methods Med Res* 2009;18(4):361-79. doi: 0962280208094691 [pii];10.1177/0962280208094691 [doi]
3. Harris RJ, Ramsay M, Hope VD, et al. Hepatitis C prevalence in England remains low and varies by ethnicity: an updated evidence synthesis. *Eur J Public Health* 2012;22(2):187-92. doi: ckr083 [pii];10.1093/eurpub/ckr083 [doi]
4. Hutchinson SJ, Roy KM, Wadd S, et al. Hepatitis C virus infection in Scotland: epidemiological review and public health challenges. *Scott Med J* 2006;51(2):8-15.
5. Prevost TC, Presanis AM, Taylor A, et al. Estimating the number of people with hepatitis C virus who have ever injected drugs and have yet to be diagnosed: an evidence synthesis approach for Scotland. *Addiction* 2015;110(8):1287-300. doi: 10.1111/add.12948
6. Hutchinson SJ, McIntyre PG, Molyneaux P, et al. Prevalence of hepatitis C among injectors in Scotland 1989-2000: declining trends among young injectors halt in the late 1990s. *Epidemiol Infect* 2002;128(3):473-77.
7. Martin NK, Foster GR, Vilar J, et al. HCV treatment rates and sustained viral response among people who inject drugs in seven UK sites: real world results and modelling of treatment impact. *J Viral Hepat* 2015;22(4):399. doi: 10.1111/jvh.12338
8. McLeod A, Weir A, Aitken C, et al. Rise in testing and diagnosis associated with Scotland's Action Plan on Hepatitis C and introduction of dried blood spot testing. *J Epidemiol Community Health* 2014;68(12):1182-8. doi: 10.1136/jech-2014-204451
9. Palmateer NE, Hutchinson SJ, Innes H, et al. Review and meta-analysis of the association between self-reported sharing of needles/syringes and hepatitis C virus prevalence and incidence among people who inject drugs in Europe. *Int J Drug Policy* 2013;24(2):85-100. doi: S0955-3959(12)00123-5 [pii];10.1016/j.drugpo.2012.08.006 [doi]
10. Palmateer NE, Taylor A, Goldberg DJ, et al. Rapid decline in HCV incidence among people who inject drugs associated with national scale-up in coverage of a combination of harm reduction interventions. *PLoS One* 2014;9(8):e104515. doi: 10.1371/journal.pone.0104515
11. Roy KM, Hutchinson SJ, Wadd S, et al. Hepatitis C virus infection among injecting drug users in Scotland: a review of prevalence and incidence data and the methods used to generate them. *Epidemiol Infect* 2007;135(3):433-42.
12. Turner KM, Hutchinson S, Vickerman P, et al. The impact of needle and syringe provision and opiate substitution therapy on the incidence of hepatitis C virus in injecting drug users: pooling of UK evidence. *Addiction* 2011;106(11):1978-88. doi: 10.1111/j.1360-0443.2011.03515.x [doi]
13. Harris RJ, Hope VD, Morongiu A, et al. Spatial mapping of hepatitis C prevalence in recent injecting drug users in contact with services. *Epidemiol Infect* 2011:1-10. doi: S0950268811001634 [pii];10.1017/S0950268811001634 [doi]
14. Hickman M, Hope V, Brady T, et al. Hepatitis C virus (HCV) prevalence, and injecting risk behaviour in multiple sites in England in 2004. *J Viral Hepat* 2007;14(9):645-52.
15. Hope VD, Hickman M, Ngui SL, et al. Measuring the incidence, prevalence and genetic relatedness of hepatitis C infections among a community recruited sample of injecting drug users, using dried blood spots. *J Viral Hepat* 2011;18:262-70. doi: JVH1297 [pii];10.1111/j.1365-2893.2010.01297.x [doi]

ISRCTN72038467

16. Sutton AJ, Gay NJ, Edmunds WJ, et al. Modelling the force of infection for hepatitis B and hepatitis C in injecting drug users in England and Wales. *BMC Infect Dis* 2006;6:93. doi: 1471-2334-6-93 [pii];10.1186/1471-2334-6-93 [doi]
17. Sweeting MJ, Hope VD, Hickman M, et al. Hepatitis C infection among injecting drug users in England and Wales (1992-2006): there and back again? *Am J Epidemiol* 2009;170(3):352-60. doi: kwp141 [pii];10.1093/aje/kwp141 [doi]
18. Wiessing L, Ferri M, Grady B, et al. Hepatitis C virus infection epidemiology among people who inject drugs in Europe: a systematic review of data for scaling up treatment and prevention. *PLoS One* 2014;9(7):e103345. doi: 10.1371/journal.pone.0103345
19. Hickman MM, N., editor. *Hepatitis C among drug users in Europe: epidemiology, treatment and prevention*. Lisbon: EMCDDA, 2016.
20. Van Den Berg C, Smit C, Van BG, et al. Full participation in harm reduction programmes is associated with decreased risk for human immunodeficiency virus and hepatitis C virus: evidence from the Amsterdam Cohort Studies among drug users. *Addiction* 2007;102(9):1454-62. doi: ADD1912 [pii];10.1111/j.1360-0443.2007.01912.x [doi]
21. Hagan H, Pouget ER, Des Jarlais DC. A systematic review and meta-analysis of interventions to prevent hepatitis C virus infection in people who inject drugs. *J Infect Dis* 2011;204(1):74-83. doi: jir196 [pii];10.1093/infdis/jir196 [doi]
22. Platt L, Reed J, Minozzi S, et al. Effectiveness of needle/syringe programmes and opiate substitution therapy in preventing HCV transmission among people who inject drugs. *Cochrane Database Syst Rev* 2016;2016(1) doi: 10.1002/14651858.CD012021
23. Hutchinson SJ, Dillon JF, Fox R, et al. Expansion of HCV treatment access to people who have injected drugs through effective translation of research into public health policy: Scotland's experience. *Int J Drug Policy* 2015 doi: 10.1016/j.drugpo.2015.05.019
24. Fraser H, Mukandavire C, Martin NK, et al. Modelling the impact of a national scale-up of interventions on hepatitis C virus transmission among people who inject drugs in Scotland. *Addiction* 2018 doi: 10.1111/add.14267 [published Online First: 2018/05/22]
25. de Vos AS, van der Helm JJ, Matser A, et al. Decline in incidence of HIV and hepatitis C virus infection among injecting drug users in Amsterdam; evidence for harm reduction? *Addiction* 2013;108(6):1070-81. doi: 10.1111/add.12125
26. Vickerman P, Martin N, Turner K, et al. Can needle and syringe programmes and opiate substitution therapy achieve substantial reductions in hepatitis C virus prevalence? Model projections for different epidemic settings. *Addiction* 2012;107(11):1984-95. doi: 10.1111/j.1360-0443.2012.03932.x [doi]
27. Dore GJ, Feld JJ. Hepatitis C virus therapeutic development: in pursuit of "perfectovir". *Clin Infect Dis* 2015;60(12):1829-36. doi: 10.1093/cid/civ197
28. Gogela NA, Lin MV, Wisocky JL, et al. Enhancing our understanding of current therapies for hepatitis C virus (HCV). *Curr HIV/AIDS Rep* 2015;12(1):68-78. doi: 10.1007/s11904-014-0243-7
29. Walker DR, Pedrosa MC, Manthena SR, et al. Early View of the Effectiveness of New Direct-Acting Antiviral (DAA) Regimens in Patients with Hepatitis C Virus (HCV). *Adv Ther* 2015;32(11):1117-27. doi: 10.1007/s12325-015-0258-5
30. Hellard M, Doyle JS, Sacks-Davis R, et al. Eradication of hepatitis C infection: The importance of targeting people who inject drugs. *Hepatology* 2014;59(2):366-69. doi: 10.1002/hep.26623
31. Hagan LM, Wolpe PR, Schinazi RF. Treatment as prevention and cure towards global eradication of hepatitis C virus. *Trends in Microbiology* 2013;21(12):625-33. doi: <http://dx.doi.org/10.1016/j.tim.2013.09.008>
32. Grebely J, Matthews GV, Lloyd AR, et al. Elimination of hepatitis C virus infection among people who inject drugs through treatment as prevention: feasibility and future requirements. *Clin Infect Dis* 2013;57(7):1014-20. doi: 10.1093/cid/cit377

ISRCTN72038467

- 1  
2  
3 33. Bruggmann P. Treatment as prevention: The breaking of taboos is required in the fight against  
4 hepatitis C among people who inject drugs. *Hepatology* 2013;58(5):1523-25. doi:  
5 10.1002/hep.26539  
6  
7 34. Martin NK, Vickerman P, Grebely J, et al. HCV treatment for prevention among people who inject  
8 drugs: Modeling treatment scale-up in the age of direct-acting antivirals. *Hepatology* 2013  
9 doi: 10.1002/hep.26431 [doi]  
10 35. Wedemeyer H, Duberg AS, Buti M, et al. Strategies to manage hepatitis C virus (HCV) disease  
11 burden. *J Viral Hepat* 2014;21 Suppl 1:60-89. doi: 10.1111/jvh.12249  
12 36. Fraser H, Zibbell J, Hoerger T, et al. Scaling-up HCV prevention and treatment interventions in  
13 rural United States-model projections for tackling an increasing epidemic. *Addiction*  
14 2018;113(1):173-82. doi: 10.1111/add.13948 [published Online First: 2017/07/25]  
15 37. Organization WH. Global Health Sector Strategy on Viral Hepatitis 2016-2021: Towards ending  
16 viral hepatitis. In: Organization WH, ed. Geneva: WHO, 2016.  
17 38. Innes HA, McDonald SA, Dillon JF, et al. Toward a more complete understanding of the  
18 association between a hepatitis C sustained viral response and cause-specific outcomes.  
19 *Hepatology* 2015;62(2):355-64. doi: 10.1002/hep.27766  
20 39. Innes HA, Hutchinson SJ, Allen S, et al. Excess liver-related morbidity of chronic hepatitis C  
21 patients, who achieve a sustained viral response, and are discharged from care. *Hepatology*  
22 2011;54(5):1547-58. doi: 10.1002/hep.24561  
23 40. Innes H, Goldberg D, Dillon J, et al. Strategies for the treatment of Hepatitis C in an era of  
24 interferon-free therapies: what public health outcomes do we value most? *Gut* 2014 doi:  
25 10.1136/gutjnl-2014-308166  
26 41. Harris RJ, Martin NK, Rand E, et al. New treatments for hepatitis C virus (HCV): scope for  
27 preventing liver disease and HCV transmission in England. *J Viral Hepat* 2016 doi:  
28 10.1111/jvh.12529  
29 42. European Association for the Study of the L. EASL recommendations on treatment of hepatitis C  
30 2014. *J Hepatol* 2014;61(2):373-95. doi: 10.1016/j.jhep.2014.05.001  
31 43. European Association for the Study of the Liver. Electronic address eee. EASL Recommendations  
32 on Treatment of Hepatitis C 2015. *J Hepatol* 2015;63(1):199-236. doi:  
33 10.1016/j.jhep.2015.03.025  
34 44. Panel AIHG. Hepatitis C guidance: AASLD-IDSAs recommendations for testing, managing, and  
35 treating adults infected with hepatitis C virus. *Hepatology* 2015 doi: 10.1002/hep.27950  
36 45. Grebely J, Robaey G, Bruggmann P, et al. Recommendations for the management of hepatitis C  
37 virus infection among people who inject drugs. *Int J Drug Policy* 2015;26(10):1028-38. doi:  
38 10.1016/j.drugpo.2015.07.005  
39 46. European Association for the Study of the Liver. Electronic address eee. EASL Recommendations  
40 on Treatment of Hepatitis C 2016. *J Hepatol* 2016 doi: 10.1016/j.jhep.2016.09.001  
41 47. Martin NK, Vickerman P, Dore GJ, et al. Prioritization of HCV treatment in the direct-acting  
42 antiviral era: An economic evaluation. *J Hepatol* 2016;65(1):17-25. doi:  
43 10.1016/j.jhep.2016.02.007  
44 48. Aleman S, Rahbin N, Weiland O, et al. A risk for hepatocellular carcinoma persists long-term after  
45 sustained virologic response in patients with hepatitis C-associated liver cirrhosis. *Clin Infect*  
46 *Dis* 2013;57(2):230-6. doi: 10.1093/cid/cit234  
47 49. van der Meer AJ, Veldt BJ, Feld JJ, et al. Association between sustained virological response and  
48 all-cause mortality among patients with chronic hepatitis C and advanced hepatic fibrosis.  
49 *JAMA* 2012;308(24):2584-93. doi: 10.1001/jama.2012.144878  
50 50. Innes H, Hutchinson SJ, Obel N, et al. Liver mortality attributable to chronic hepatitis C virus  
51 infection in Denmark and Scotland--using spontaneous resolvers as the benchmark  
52 comparator. *Hepatology* 2016;63(5):1506-16. doi: 10.1002/hep.28458  
53 51. Hickman M, De Angelis D, Vickerman P, et al. HCV Treatment as Prevention in People Who Inject  
54 Drugs--testing the evidence. *Current opinion in infectious diseases* 2015;28(6):576.  
55  
56  
57  
58  
59  
60

ISRCTN72038467

- 1  
2  
3  
4  
5  
6  
7  
8  
9  
10  
11  
12  
13  
14  
15  
16  
17  
18  
19  
20  
21  
22  
23  
24  
25  
26  
27  
28  
29  
30  
31  
32  
33  
34  
35  
36  
37  
38  
39  
40  
41  
42  
43  
44  
45  
46  
47  
48  
49  
50  
51  
52  
53  
54  
55  
56  
57  
58  
59  
60
52. Martin NK, Vickerman P, Dore GJ, et al. The hepatitis C virus epidemics in key populations (including people who inject drugs, prisoners and MSM): the use of direct-acting antivirals as treatment for prevention. *Current opinion in HIV and AIDS* 2015;10(5):374-80. doi: 10.1097/COH.000000000000179
  53. Fraser H, Martin NK, Brummer-Korvenkontio H, et al. Model projections on the impact of HCV treatment in the prevention of HCV transmission among people who inject drugs in Europe. *J Hepatol* 2018;68(3):402-11. doi: 10.1016/j.jhep.2017.10.010 [published Online First: 2017/10/31]
  54. Judd A, Parry J, Hickman M, et al. Evaluation of a modified commercial assay in detecting antibody to hepatitis C virus in oral fluids and dried blood spots. *J Med Virol* 2003;71(1):49-55.
  55. Bennett S, Gunson RN, McAllister GE, et al. Detection of hepatitis C virus RNA in dried blood spots. *J Clin Virol* 2012;54(2):106-09. doi: S1386-6532(12)00053-4 [pii];10.1016/j.jcv.2012.02.004 [doi]
  56. Martin NK, Vickerman P, Brew IF, et al. Is increased hepatitis C virus case-finding combined with current or 8-week to 12-week direct-acting antiviral therapy cost-effective in UK prisons? A prevention benefit analysis. *Hepatology* 2016;63(6):1796-808. doi: 10.1002/hep.28497
  57. MacArthur GJ, Minozzi S, Martin N, et al. Opiate substitution treatment and HIV transmission in people who inject drugs: systematic review and meta-analysis. *BMJ* 2012;345:e5945.
  58. MacArthur GJ, van VE, Palmateer N, et al. Interventions to prevent HIV and Hepatitis C in people who inject drugs: A review of reviews to assess evidence of effectiveness. *IntJ Drug Policy* 2013 doi: S0955-3959(13)00116-3 [pii];10.1016/j.drugpo.2013.07.001 [doi]
  59. Palmateer N, Hutchinson S, McAllister G, et al. Risk of transmission associated with sharing drug injecting paraphernalia: analysis of recent hepatitis C virus (HCV) infection using cross-sectional survey data. *J Viral Hepat* 2014;21(1):25-32. doi: 10.1111/jvh.12117
  60. Palmateer N, Kimber J, Hickman M, et al. Evidence for the effectiveness of sterile injecting equipment provision in preventing hepatitis C and human immunodeficiency virus transmission among injecting drug users: a review of reviews. *Addiction* 2010;105(5):844-59. doi: ADD2888 [pii];10.1111/j.1360-0443.2009.02888.x [doi]
  61. Presanis AM, Gill ON, Chadborn TR, et al. Insights into the rise in HIV infections, 2001 to 2008: a Bayesian synthesis of prevalence evidence. *AIDS* 2010;24(18):2849-58. doi: 10.1097/QAD.0b013e32834021ed [doi]
  62. England PH. Hepatitis C in the UK 2016 report: Working towards its elimination as a major public health threat. In: Harris HE, ed. London: Public Health England, 2016.
  63. Health Protection Scotland UotWoS, Glasgow Caledonian University and the West of Scotland Specialist Virology Centre. The Needle Exchange Surveillance Initiative: Prevalence of blood-borne viruses and injecting risk behaviours among people who inject drugs attending injecting equipment provision services in Scotland, 2008-09 to 2015-16. In: Scotland HP, ed. Glasgow, 2017.
  64. Brant LJ, Hurrelle M, Balogun MA, et al. Sentinel laboratory surveillance of hepatitis C antibody testing in England: understanding the epidemiology of HCV infection. *Epidemiol Infect* 2007;135(3):417-26. doi: 10.1017/S0950268806006832
  65. Brant LJ, Hurrelle M, Balogun MA, et al. Where are people being tested for anti-HCV in England? Results from sentinel laboratory surveillance. *J Viral Hepat* 2008;15(10):729-39. doi: 10.1111/j.1365-2893.2008.01000.x
  66. Lattimore S, Irving W, Collins S, et al. Using surveillance data to determine treatment rates and outcomes for patients with chronic hepatitis C virus infection. *Hepatology* 2014;59(4):1343-50. doi: 10.1002/hep.26926
  67. Ward Z, Platt L, Sweeney S, et al. Impact of current and scaled-up levels of hepatitis C prevention and treatment interventions for people who inject drugs in three UK settings-what is

ISRCTN72038467

- 1  
2  
3 required to achieve the WHO's HCV elimination targets? *Addiction* 2018 doi:  
4 10.1111/add.14217 [published Online First: 2018/05/19]  
5  
6 68. Abadie A DA, Hainmueller, J. Comparative Politics and the Synthetic Control Method. *American*  
7 *Journal of Political Science* 2015;59:15.  
8  
9 69. Abadie A DA, Hainmueller J. Synthetic Control Methods for Comparative Case Studies: Estimating  
10 the Effect of California's Tobacco Control  
11 Program. *Journal of the American Statistical Association* 2010;105:12.  
12  
13 70. Bouttell J, Craig P, Lewsey J, et al. Synthetic control methodology as a tool for evaluating  
14 population-level health interventions. *J Epidemiol Community Health* 2018 doi:  
15 10.1136/jech-2017-210106 [published Online First: 2018/04/15]  
16  
17 71. Brodersen KH, Gallusser F, Koehler J, et al. Inferring causal impact using Bayesian structural time-  
18 series models. 2015:247-74. doi: 10.1214/14-AOAS788  
19  
20 72. Scott S VH. Predicting the present with bayesian structural time series. *International Journal of*  
21 *Mathematical Modelling and Numerical Optimisation* 2014;2014(5):23.  
22  
23 73. Treloar C, Newland J, Rance J, et al. Uptake and delivery of hepatitis C treatment in opiate  
24 substitution treatment: perceptions of clients and health professionals. *J Viral Hepat*  
25 2010;17(12):839-44. doi: JVH1250 [pii];10.1111/j.1365-2893.2009.01250.x [doi]  
26  
27 74. Treloar C, Rance J, Dore GJ, et al. Barriers and facilitators for assessment and treatment of  
28 hepatitis C virus infection in the opioid substitution treatment setting: insights from the  
29 ETHOS study. *J Viral Hepat* 2014;21(8):560-7. doi: 10.1111/jvh.12183  
30  
31 75. Harris M, Rhodes T. Hepatitis C treatment access and uptake for people who inject drugs: a  
32 review mapping the role of social factors. *Harm Reduct J* 2013;10:7. doi: 10.1186/1477-  
33 7517-10-7  
34  
35 76. Swan D, Long J, Carr O, et al. Barriers to and facilitators of hepatitis C testing, management, and  
36 treatment among current and former injecting drug users: a qualitative exploration. *AIDS*  
37 *Patient Care STDS* 2010;24(12):753-62. doi: 10.1089/apc.2010.0142  
38  
39 77. Rhodes T, Harris M, Martin A. Negotiating access to medical treatment and the making of patient  
40 citizenship: the case of hepatitis C treatment. *Social Health Illn* 2013;35(7):1023-44. doi:  
41 10.1111/1467-9566.12018  
42  
43 78. Harris M, Albers E, Swan T. The promise of treatment as prevention for hepatitis C: Meeting the  
44 needs of people who inject drugs? *Int J Drug Policy* 2015;26(10):963-9. doi:  
45 10.1016/j.drugpo.2015.05.005  
46  
47 79. Rance J, Treloar C, Group ES. 'Not just methadone Tracy': transformations in service-user identity  
48 following the introduction of hepatitis C treatment into Australian opiate substitution  
49 settings. *Addiction* 2014;109(3):452-9.  
50  
51 80. Treloar C, Rance J, Backmund M. Understanding barriers to hepatitis C virus care and  
52 stigmatization from a social perspective. *Clin Infect Dis* 2013;57 Suppl 2:S51-5. doi:  
53 10.1093/cid/cit263  
54  
55 81. Treloar C, Rance J, Bryant J, et al. Harm reduction workers and the challenge of engaging couples  
56 who inject drugs in hepatitis C prevention. *Drug Alcohol Depend* 2016;168:170-75. doi:  
57 10.1016/j.drugalcdep.2016.09.010  
58  
59 82. Treloar C, Rance J, Bryant J, et al. Understanding decisions made about hepatitis C treatment by  
60 couples who inject drugs. *J Viral Hepat* 2016;23(2):89-95. doi: 10.1111/jvh.12451  
61  
62 83. Jack K, Islip N, Linsley P, et al. Prison officers' views about hepatitis C testing and treatment: A  
63 qualitative enquiry. *J Clin Nurs* 2016 doi: 10.1111/jocn.13489  
64  
65 84. Rich ZC, Chu C, Mao J, et al. Facilitators of HCV treatment adherence among people who inject  
66 drugs: a systematic qualitative review and implications for scale up of direct acting antivirals.  
67 *BMC Public Health* 2016;16:994. doi: 10.1186/s12889-016-3671-z  
68  
69 85. Harris M. Managing expense and expectation in a treatment revolution: Problematizing  
70 prioritisation through an exploration of hepatitis C treatment 'benefit'. *Int J Drug Policy*  
2017;47:161-68. doi: 10.1016/j.drugpo.2017.03.015 [published Online First: 2017/04/30]

ISRCTN72038467

- 1  
2  
3  
4  
5  
6  
7  
8  
9  
10  
11  
12  
13  
14  
15  
16  
17  
18  
19  
20  
21  
22  
23  
24  
25  
26  
27  
28  
29  
30  
31  
32  
33  
34  
35  
36  
37  
38  
39  
40  
41  
42  
43  
44  
45  
46  
47  
48  
49  
50  
51  
52  
53  
54  
55  
56  
57  
58  
59  
60
86. Rance J, Newland J, Hopwood M, et al. The politics of place(ment): problematising the provision of hepatitis C treatment within opiate substitution clinics. *Soc Sci Med* 2012;74(2):245-53. doi: S0277-9536(11)00644-7 [pii];10.1016/j.socscimed.2011.10.003 [doi]
87. Lankenau SE, Sanders B, Hathazi D, et al. Recruiting and retaining mobile young injection drug users in a longitudinal study. *Subst Use Misuse* 2010;45(5):684-99. doi: 10.3109/10826081003594914
88. Stewart KE, Wright PB, Sims D, et al. The "translators": engaging former drug users as key research staff to design and implement a risk reduction program for rural cocaine users. *Subst Use Misuse* 2012;47(5):547-54. doi: 10.3109/10826084.2011.644379
89. Harris M. "Three in the Room": Embodiment, Disclosure, and Vulnerability in Qualitative Research. *Qual Health Res* 2015;25(12):1689-99. doi: 10.1177/1049732314566324
90. Braun V, Clarke V. Using thematic analysis in psychology. *Qualitative Research in Psychology* 2006;3(2):77-101. doi: 10.1191/1478088706qp063oa
91. Rogers EM. Diffusion of preventive innovations. *Addict Behav* 2002;27(6):989-93.
92. Cane J, O'Connor D, Michie S. Validation of the theoretical domains framework for use in behaviour change and implementation research. *Implement Sci* 2012;7:37. doi: 10.1186/1748-5908-7-37
93. Clark JA, Gifford AL. Resolute efforts to cure hepatitis C: Understanding patients' reasons for completing antiviral treatment. *Health (London)* 2015;19(5):473-89. doi: 10.1177/1363459314555237
94. Batchelder AW, Peyser D, Nahvi S, et al. "Hepatitis C treatment turned me around:" Psychological and behavioral transformation related to hepatitis C treatment. *Drug Alcohol Depend* 2015;153:66-71. doi: 10.1016/j.drugalcdep.2015.06.007
95. Aspinall EJ, Hutchinson SJ, Janjua NZ, et al. Trends in mortality after diagnosis of hepatitis C virus infection: an international comparison and implications for monitoring the population impact of treatment. *J Hepatol* 2015;62(2):269-77. doi: 10.1016/j.jhep.2014.09.001
96. Aspinall EJ, Corson S, Doyle JS, et al. Treatment of hepatitis C virus infection among people who are actively injecting drugs: a systematic review and meta-analysis. *Clin Infect Dis* 2013;57 Suppl 2:S80-9. doi: 10.1093/cid/cit306
97. Innes HA, Hutchinson SJ, Allen S, et al. Ranking predictors of a sustained viral response for patients with chronic hepatitis C treated with pegylated interferon and ribavirin in Scotland. *Eur J Gastroenterol Hepatol* 2012;24(6):646-55. doi: 10.1097/MEG.0b013e32835201a4
98. McDonald SA, Hutchinson SJ, Bird SM, et al. Excess morbidity in the hepatitis C-diagnosed population in Scotland, 1991-2006. *Epidemiol Infect* 2011;139(3):344-53. doi: 10.1017/S0950268810001421
99. McDonald SA, Hutchinson SJ, Bird SM, et al. A record-linkage study of the development of hepatocellular carcinoma in persons with hepatitis C infection in Scotland. *Br J Cancer* 2008;99(5):805-10.
100. McDonald SA, Hutchinson SJ, Bird SM, et al. A population-based record linkage study of mortality in hepatitis C-diagnosed persons with or without HIV coinfection in Scotland. *Stat Methods Med Res* 2009;18(3):271-83. doi: 10.1177/0962280208094690
101. Gao L, Dimitropoulou P, Robertson JR, et al. Risk-factors for methadone-specific deaths in Scotland's methadone-prescription clients between 2009 and 2013. *Drug Alcohol Depend* 2016;167:214-23. doi: 10.1016/j.drugalcdep.2016.08.627
102. Bird SM, Fischbacher CM, Graham L, et al. Impact of opioid substitution therapy for Scotland's prisoners on drug-related deaths soon after prisoner release. *Addiction* 2015;110(10):1617-24. doi: 10.1111/add.12969
103. Bird SM, Hutchinson SJ. Male drugs-related deaths in the fortnight after release from prison: Scotland, 1996-99. *Addiction* 2003;98(2):185-90.



ISRCTN72038467

- 1  
2  
3 104. Alvarez-Madrado S, McTaggart S, Nangle C, et al. Data Resource Profile: The Scottish National  
4 Prescribing Information System (PIS). *Int J Epidemiol* 2016;45(3):714-15f. doi:  
5 10.1093/ije/dyw060  
6  
7 105. Graham L, Fischbacher CM, Stockton D, et al. Understanding extreme mortality among  
8 prisoners: a national cohort study in Scotland using data linkage. *Eur J Public Health*  
9 2015;25(5):879-85. doi: 10.1093/eurpub/cku252  
10  
11 106. Merrall EL, Bird SM, Hutchinson SJ. Mortality of those who attended drug services in Scotland  
12 1996-2006: record-linkage study. *Int J Drug Policy* 2012;23(1):24-32. doi:  
13 10.1016/j.drugpo.2011.05.010  
14  
15 107. McDonald SA, Hutchinson SJ, Bird SM, et al. Hospitalisation for an alcohol-related cause among  
16 injecting drug users in Scotland: increased risk following diagnosis with hepatitis C infection.  
17 *Int J Drug Policy* 2011;22(1):63-9. doi: 10.1016/j.drugpo.2010.04.003  
18  
19 108. de Vos AS, Prins M, Kretzschmar ME. Hepatitis C virus treatment as prevention among injecting  
20 drug users: who should we cure first? *Addiction* 2015;110(6):975-83. doi:  
21 10.1111/add.12842  
22  
23 109. Boily MC, Lowndes CM, Vickerman P, et al. Evaluating large-scale HIV prevention interventions:  
24 study design for an integrated mathematical modelling approach. *Sex Transm Infect*  
25 2007;83(7):582-89. doi: sti.2007.027516 [pii];10.1136/sti.2007.027516 [doi]  
26  
27 110. Boily MC, Pickles M, Lowndes CM, et al. Positive impact of a large-scale HIV prevention program  
28 among female sex workers and clients in Karnataka state, India. *AIDS* 2013 doi:  
29 10.1097/QAD.0b013e32835fba81 [doi]  
30  
31 111. Hallett TB, Gregson S, Mugurungi O, et al. Assessing evidence for behaviour change affecting  
32 the course of HIV epidemics: a new mathematical modelling approach and application to  
33 data from Zimbabwe. *Epidemics* 2009;1(2):108-17. doi: 10.1016/j.epidem.2009.03.001  
34  
35 112. Pickles M, Boily MC, Vickerman P, et al. Assessment of the population-level effectiveness of the  
36 Avahan HIV-prevention programme in South India: a preplanned, causal-pathway-based  
37 modelling analysis. *Lancet Glob Health* 2013;1(5):e289-99. doi: 10.1016/S2214-  
38 109X(13)70083-4  
39  
40 113. Martin NK, Hickman M, Miners A, et al. Cost-effectiveness of HCV case-finding for people who  
41 inject drugs via dried blood spot testing in specialist addiction services and prisons. *BMJ*  
42 *open* 2013;3(8) doi: 10.1136/bmjopen-2013-003153  
43  
44 114. Martin NK, Miners A, Vickerman P. Assessing the cost-effectiveness of interventions aimed at  
45 promoting and offering hepatitis C testing to injecting drug users: An economic modelling  
46 report. London, 2012.  
47  
48 115. Martin NK, Pitcher AB, Vickerman P, et al. Optimal control of hepatitis C antiviral treatment  
49 programme delivery for prevention amongst a population of injecting drug users. *PLoS One*  
50 2011;6(8):e22309. doi: 10.1371/journal.pone.0022309 [doi];PONE-D-10-01568 [pii]  
51  
52 116. Martin NK, Vickerman P, Miners A, et al. The cost-effectiveness of HCV antiviral treatment for  
53 injecting drug user populations. *Hepatology* 2012;55(1):49-57. doi: 10.1002/hep.24656 [doi]  
54  
55 117. Martin NK, Vickerman P, Miners A, et al. How cost-effective is hepatitis C virus treatment for  
56 people who inject drugs? *Journal of gastroenterology and hepatology* 2013;28(4):590-2. doi:  
57 10.1111/jgh.12113  
58  
59 118. Kimber J, Copeland L, Hickman M, et al. Survival and cessation in injecting drug users:  
60 prospective observational study of outcomes and effect of opiate substitution treatment.  
*BMJ* 2010;341:c3172.  
119. McDonald SA, Hutchinson SJ, Palmateer NE, et al. Decrease in health-related quality of life  
associated with awareness of hepatitis C virus infection among people who inject drugs in  
Scotland. *JHepatol* 2013;58(3):460-66. doi: S0168-8278(12)00836-7  
[pii];10.1016/j.jhep.2012.11.004 [doi]  
120. Wright M, Grieve R, Roberts J, et al. Health benefits of antiviral therapy for mild chronic  
hepatitis C: randomised controlled trial and economic evaluation. *Health Technol Assess*  
2006;10(21):1-113, iii. doi: 95-24-03 [pii]

ISRCTN72038467

1  
2  
3  
4  
5  
6  
7  
8  
9  
10  
11  
12  
13  
14  
15  
16  
17  
18  
19  
20  
21  
22  
23  
24  
25  
26  
27  
28  
29  
30  
31  
32  
33  
34  
35  
36  
37  
38  
39  
40  
41  
42  
43  
44  
45  
46  
47  
48  
49  
50  
51  
52  
53  
54  
55  
56  
57  
58  
59  
60

For peer review only

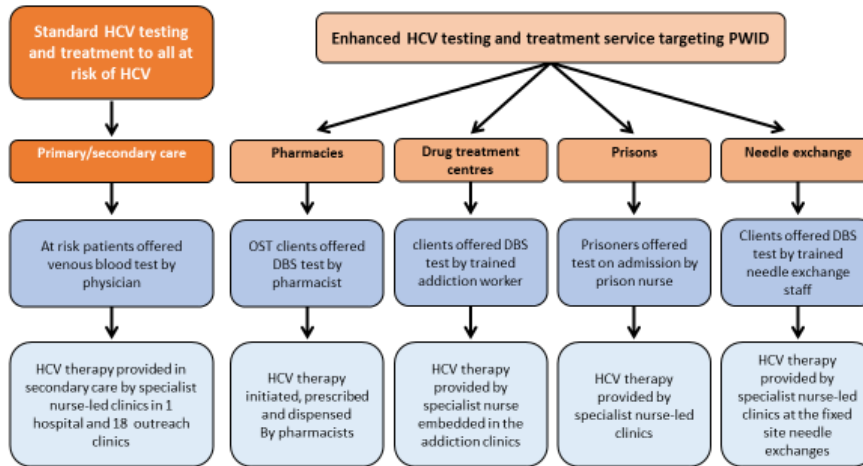

PWID defined as those who either (a) are currently injecting drugs, (b) have ever injected drugs and are currently on opioid substitute therapy, or (c) have ever injected drugs and are currently in prison

DBS: dried blood spot; OST: opioid substitution therapies; PWID: people who inject drugs

Peer review only

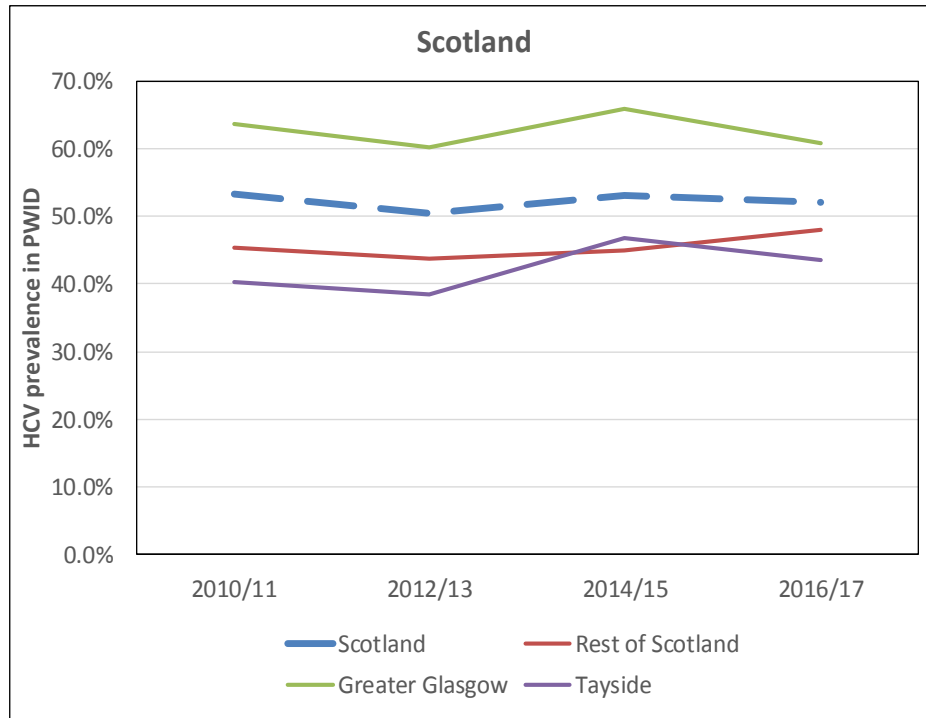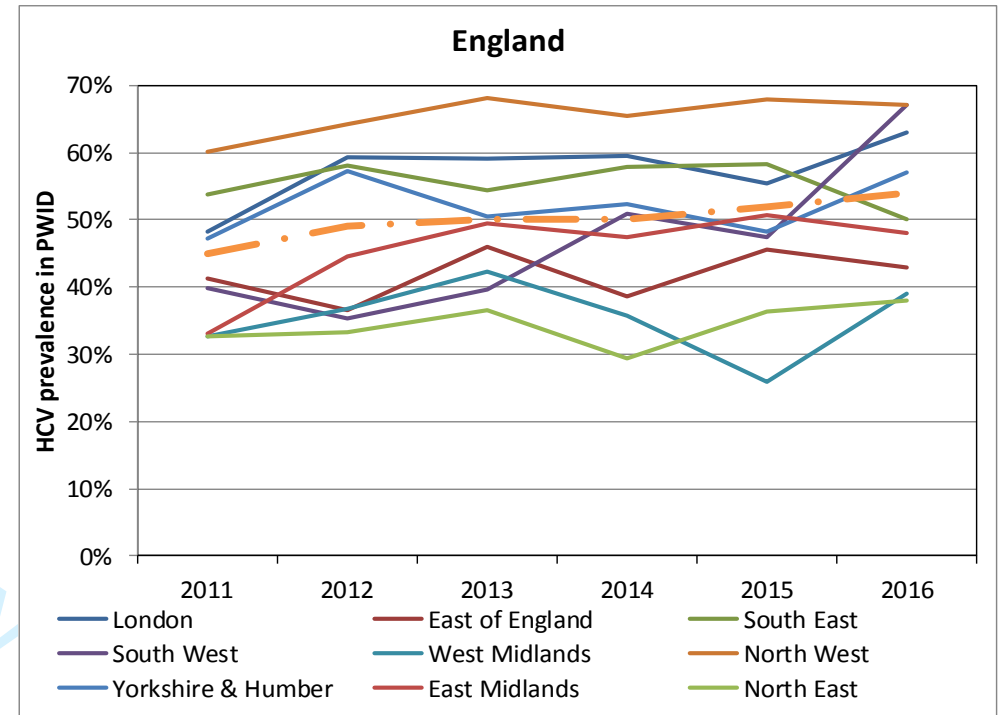

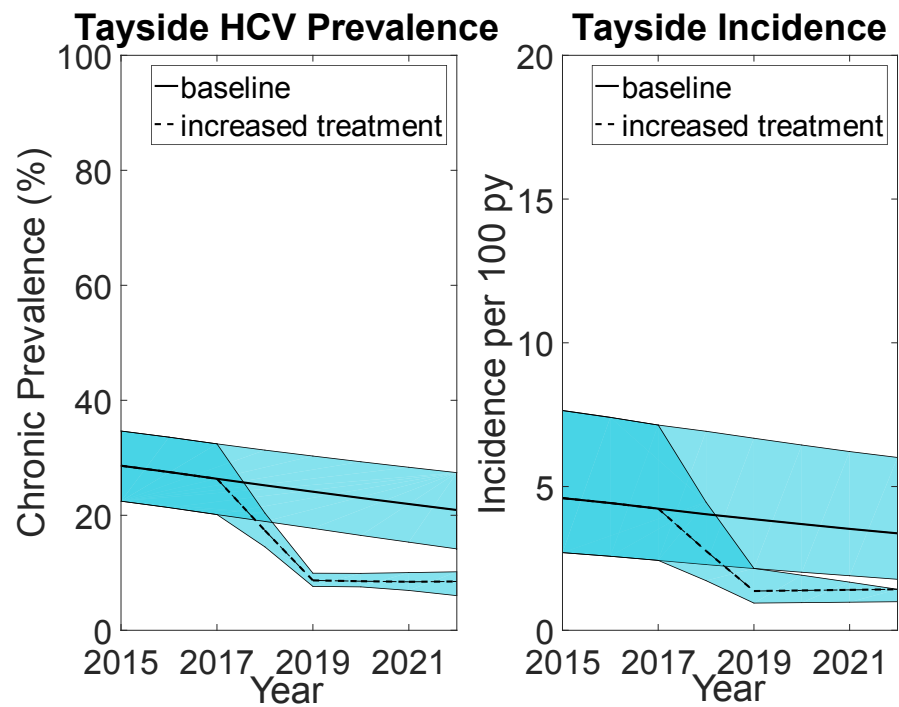

view only

1  
2  
3  
4  
5  
6  
7  
8  
9  
10  
11  
12  
13  
14  
15  
16  
17  
18  
19  
20  
21  
22  
23  
24  
25  
26  
27  
28  
29  
30  
31  
32  
33  
34  
35  
36  
37  
38  
39  
40  
41  
42  
43  
44  
45  
46

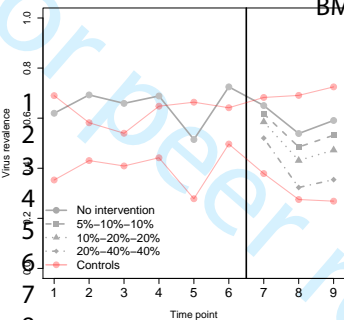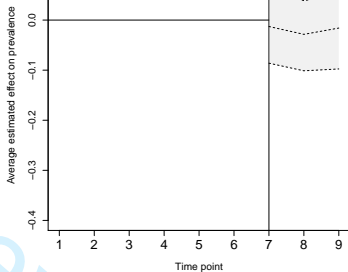

Reduction 10%–20%–20%

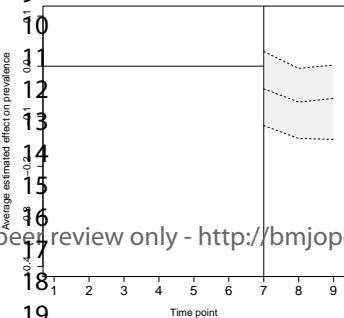

Reduction 20%–40%–40%

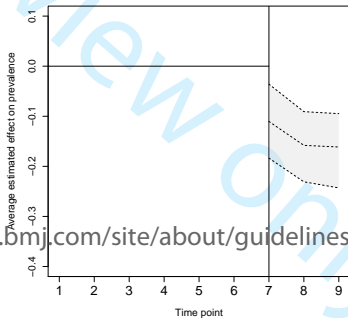

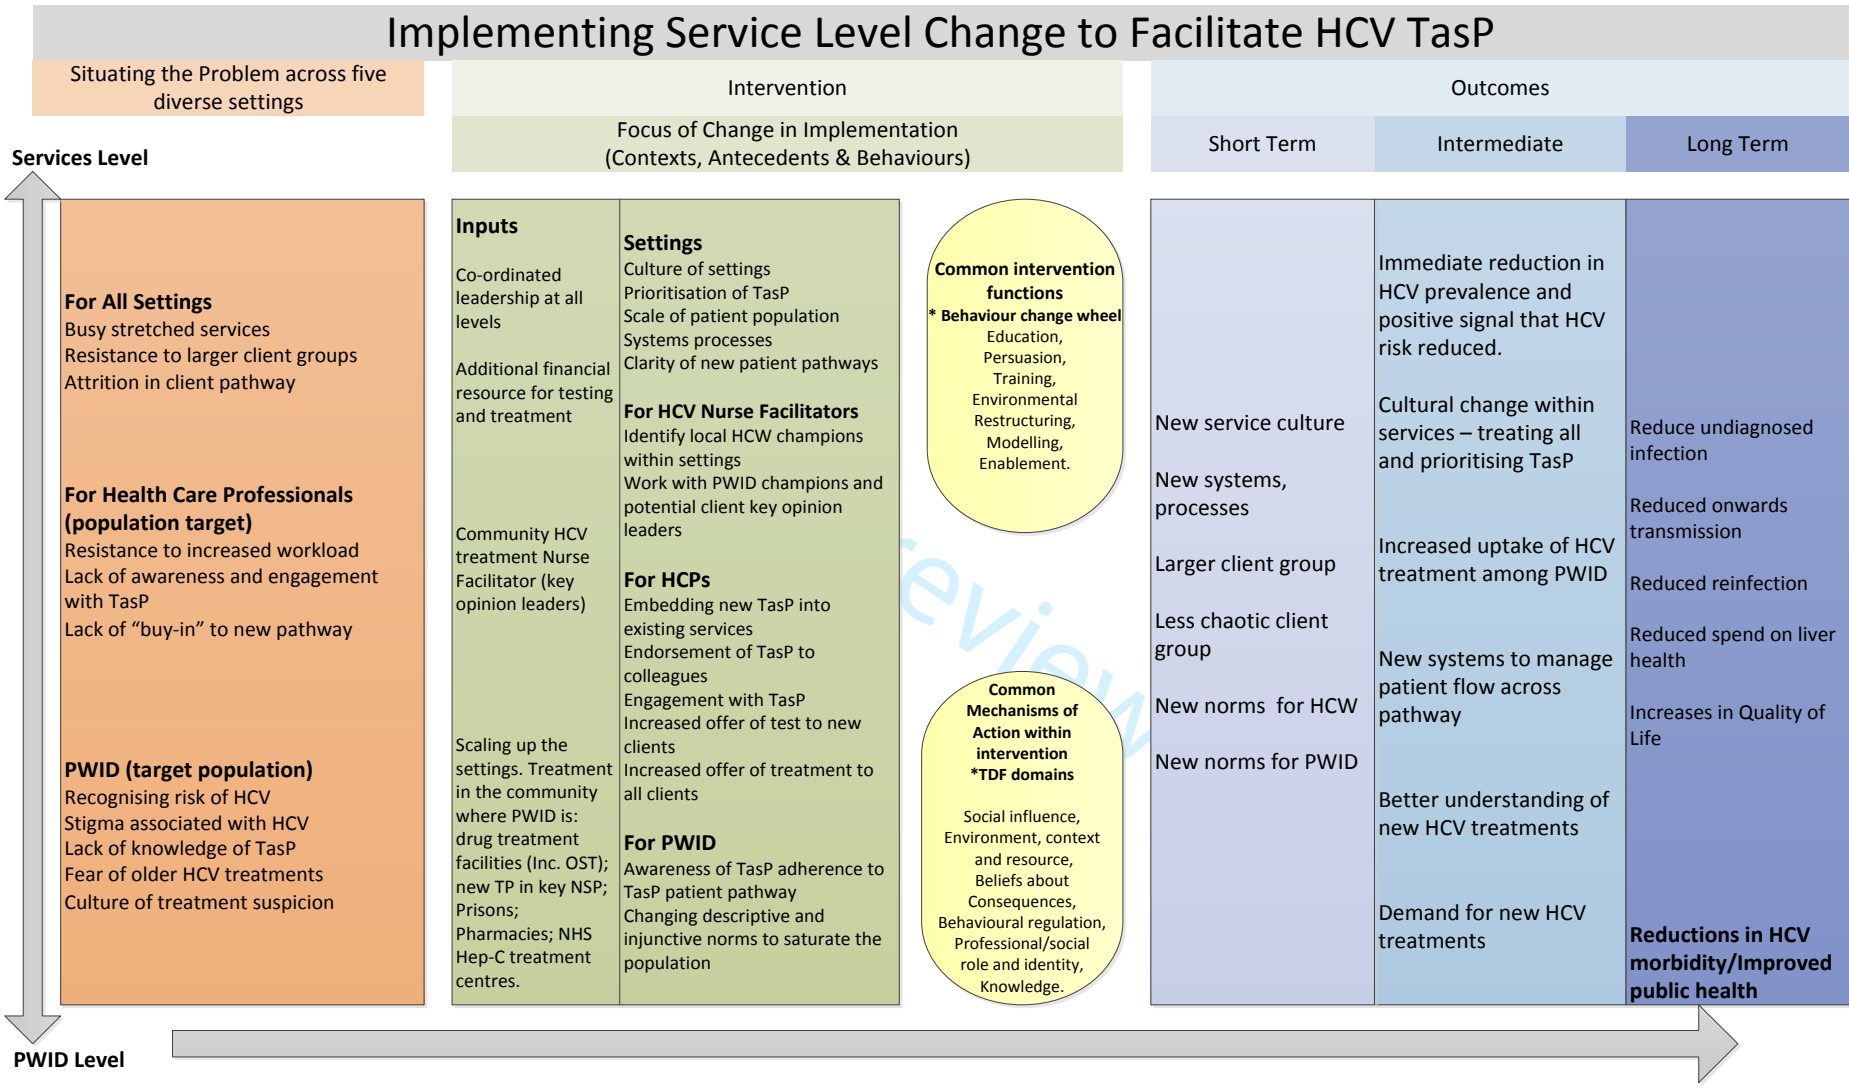

# BMJ Open

## Evaluating the Population Impact of Hepatitis C Direct Acting Antiviral Treatment as Prevention for People Who Inject Drugs (EPIToPe) – a natural experiment

|                               |                                                                                                                                                                                                                                                                                                                                                                                                                                                                                                                                                                                                                                                                                                                                                                                                                                                                                                                                                                                                                                                                                                                                                                                                                                                                                                                                                                                                                                                                                                                                                                                                                                                                                                                                                                                                                                                                                                                                                                                                                                                                        |
|-------------------------------|------------------------------------------------------------------------------------------------------------------------------------------------------------------------------------------------------------------------------------------------------------------------------------------------------------------------------------------------------------------------------------------------------------------------------------------------------------------------------------------------------------------------------------------------------------------------------------------------------------------------------------------------------------------------------------------------------------------------------------------------------------------------------------------------------------------------------------------------------------------------------------------------------------------------------------------------------------------------------------------------------------------------------------------------------------------------------------------------------------------------------------------------------------------------------------------------------------------------------------------------------------------------------------------------------------------------------------------------------------------------------------------------------------------------------------------------------------------------------------------------------------------------------------------------------------------------------------------------------------------------------------------------------------------------------------------------------------------------------------------------------------------------------------------------------------------------------------------------------------------------------------------------------------------------------------------------------------------------------------------------------------------------------------------------------------------------|
| Journal:                      | <i>BMJ Open</i>                                                                                                                                                                                                                                                                                                                                                                                                                                                                                                                                                                                                                                                                                                                                                                                                                                                                                                                                                                                                                                                                                                                                                                                                                                                                                                                                                                                                                                                                                                                                                                                                                                                                                                                                                                                                                                                                                                                                                                                                                                                        |
| Manuscript ID                 | bmjopen-2019-029538.R1                                                                                                                                                                                                                                                                                                                                                                                                                                                                                                                                                                                                                                                                                                                                                                                                                                                                                                                                                                                                                                                                                                                                                                                                                                                                                                                                                                                                                                                                                                                                                                                                                                                                                                                                                                                                                                                                                                                                                                                                                                                 |
| Article Type:                 | Protocol                                                                                                                                                                                                                                                                                                                                                                                                                                                                                                                                                                                                                                                                                                                                                                                                                                                                                                                                                                                                                                                                                                                                                                                                                                                                                                                                                                                                                                                                                                                                                                                                                                                                                                                                                                                                                                                                                                                                                                                                                                                               |
| Date Submitted by the Author: | 26-Apr-2019                                                                                                                                                                                                                                                                                                                                                                                                                                                                                                                                                                                                                                                                                                                                                                                                                                                                                                                                                                                                                                                                                                                                                                                                                                                                                                                                                                                                                                                                                                                                                                                                                                                                                                                                                                                                                                                                                                                                                                                                                                                            |
| Complete List of Authors:     | <p>Hickman, M; Bristol<br/> Dillon, John; University of Dundee Division of Cardiovascular and Diabetes Medicine, Liver Group<br/> Elliott, Lawrie; Glasgow Caledonian University, Department of Nursing and Community Health<br/> De Angelis, Daniela; MRC Biostatistics Unit<br/> Vickerman, Peter; London School of Hygiene and Tropical Medicine; University of Bristol, School of Social and Community Medicine<br/> Foster, Graham; Barts and The London School of Medicine<br/> Donnan, Peter; University of Dundee, Dundee Epidemiology and Biostatistics Unit<br/> Eriksen, Ann; Tayside Health Board<br/> Flowers, Paul; Glasgow Caledonian University,<br/> Goldberg, David; Health Protection Scotland<br/> Hollingworth, William; University of Bristol, School of Social and Community Medicine<br/> Ijaz, Samreen; Public Health England Centre for Infection<br/> Liddell, David; Scottish Drugs Forum<br/> Mandal, Sema; Public Health England, Immunisation, Hepatitis, Blood Safety and Countermeasures Response; National Institute for Health Research Health Protection Unit<br/> Martin, Natasha; University of California, San Diego<br/> Beer, Lewis; University of Dundee, Tayside Clinical Trials Unit<br/> Drysdale, Kate; Barts Health NHS Trust<br/> Fraser, Hannah; University of Bristol, School of Social and Community Medicine<br/> Glass, Rachel; Public Health England, Immunisation, Hepatitis, Blood Safety and Countermeasures Response<br/> Graham, Lesley; ISD Scotland<br/> Gunson, Rory; Gartnavel General Hospital, West Of Scotland Specialist Virology Centre<br/> Hamilton, Emma; Scottish Drug Forum<br/> Harris, Helen; Public Health England, Immunisation, Hepatitis, Blood Safety and Countermeasures Response<br/> Harris, Magdalena; London School of Hygiene and Tropical Medicine, Centre for Research on Drugs and Health Behaviours<br/> Harris, Ross; Public Health England, Immunisation, Hepatitis, Blood Safety and Countermeasures Response<br/> Heinsbroek, Ellen; Public Health England Colindale</p> |



|                                 |                                                                                                                                                                                                                                                                                                                                                                                                                                                                                                                                                                                                                                                                                                                                                                                                                                                                                                                                                                                                                                                                                                                                                                                                                                                                                                                                                                                                                                                                                                                                                                                                                                                                                                                                                                                                |
|---------------------------------|------------------------------------------------------------------------------------------------------------------------------------------------------------------------------------------------------------------------------------------------------------------------------------------------------------------------------------------------------------------------------------------------------------------------------------------------------------------------------------------------------------------------------------------------------------------------------------------------------------------------------------------------------------------------------------------------------------------------------------------------------------------------------------------------------------------------------------------------------------------------------------------------------------------------------------------------------------------------------------------------------------------------------------------------------------------------------------------------------------------------------------------------------------------------------------------------------------------------------------------------------------------------------------------------------------------------------------------------------------------------------------------------------------------------------------------------------------------------------------------------------------------------------------------------------------------------------------------------------------------------------------------------------------------------------------------------------------------------------------------------------------------------------------------------|
|                                 | <p>Hope, Vivian; Liverpool John Moores University<br/> Horwood, Jeremy; University of Bristol, UK, School of Social and Community Medicine<br/> Inglis, Sarah; University of Dundee, Division of Neuoscience; University of Dundee, Tayside Clinical Trials Unit<br/> Innes, Hamish; Glasgow Caledonian University, School of health and life sciences<br/> Lane, Athene; University of Bristol, School of Social and Community Medicine<br/> Meadows, Jade; University of Bristol School of Social and Community Medicine<br/> McAuley, Andrew; NHS Health Scotland<br/> Metcalf, Chris; University of Bristol, Social Medicine<br/> Migchelsen, Stephanie; Public Health England, Immunisation, Hepatitis, Blood Safety and Countermeasures Response<br/> Murray, Alex; Scottish Drug Forum<br/> Myring, Gareth; University of Bristol School of Social and Community Medicine<br/> Palmateer, Norah E.; Hlth Protect Scotland, Blood-borne viruses and sexually transmitted infections; Glasgow Caledonian University,<br/> Presanis, Anne; Institute of Public Health, MRC Biostatistics Unit<br/> Ramsay, Mary; Public Health England, immunisation; London School of Hygiene and Tropical Medicine, Epidemiology<br/> Samartsidis, Pantelis; MRC Biostatistics Unit<br/> Simmons, Ruth; Public Health England,<br/> Sinka, Katy; Public Health England, Immunisation, Hepatitis, Blood Safety and Countermeasures Response<br/> Vojt, Gabriele; Glasgow Caledonian University<br/> Ward, Zoe; Bristol, Population Health Sciences, Bristol Medical School<br/> Whiteley, David; Edinburgh Napier University<br/> Yeung, Alan; Glasgow Caledonian University<br/> Hutchinson, Sharon; Health Protection Scotland, ; Glasgow Caledonian University, School of Health and Life Sciences</p> |
| <b>Primary Subject Heading</b>: | Public health                                                                                                                                                                                                                                                                                                                                                                                                                                                                                                                                                                                                                                                                                                                                                                                                                                                                                                                                                                                                                                                                                                                                                                                                                                                                                                                                                                                                                                                                                                                                                                                                                                                                                                                                                                                  |
| Secondary Subject Heading:      | Addiction, Epidemiology, Gastroenterology and hepatology, Infectious diseases, Qualitative research                                                                                                                                                                                                                                                                                                                                                                                                                                                                                                                                                                                                                                                                                                                                                                                                                                                                                                                                                                                                                                                                                                                                                                                                                                                                                                                                                                                                                                                                                                                                                                                                                                                                                            |
| Keywords:                       | Hepatology < INTERNAL MEDICINE, INFECTIOUS DISEASES, Epidemiology < INFECTIOUS DISEASES, PUBLIC HEALTH, Public health < INFECTIOUS DISEASES, Infection control < INFECTIOUS DISEASES                                                                                                                                                                                                                                                                                                                                                                                                                                                                                                                                                                                                                                                                                                                                                                                                                                                                                                                                                                                                                                                                                                                                                                                                                                                                                                                                                                                                                                                                                                                                                                                                           |
|                                 |                                                                                                                                                                                                                                                                                                                                                                                                                                                                                                                                                                                                                                                                                                                                                                                                                                                                                                                                                                                                                                                                                                                                                                                                                                                                                                                                                                                                                                                                                                                                                                                                                                                                                                                                                                                                |

SCHOLARONE™  
Manuscripts

1  
2  
3  
4  
5  
6  
7  
8  
9  
10  
11  
12  
13  
14  
15  
16  
17  
18  
19  
20  
21  
22  
23  
24  
25  
26  
27  
28  
29  
30  
31  
32  
33  
34  
35  
36  
37  
38  
39  
40  
41  
42  
43  
44  
45  
46  
47  
48  
49  
50  
51  
52  
53  
54  
55  
56  
57  
58  
59  
60

ISRCTN72038467

**Evaluating the Population Impact of Hepatitis C Direct Acting Antiviral Treatment as Prevention for People Who Inject Drugs (EPIToPe) – a natural experiment (Protocol)**

**Authors:**

Hickman M<sup>1</sup>, Dillon J<sup>2</sup>, Elliott L<sup>3</sup>, De Angelis D<sup>4</sup>, Vickerman P<sup>1</sup>, Foster G<sup>5</sup>, Donnan PT<sup>2</sup>, Eriksen A<sup>6</sup>, Flowers P<sup>3</sup>, Goldberg D<sup>7</sup>, Hollingworth W<sup>1</sup>, Ijaz S<sup>8</sup>, Liddell D<sup>9</sup>, Mandal S<sup>8</sup>, Martin NK<sup>10,1</sup>, Beer L<sup>2</sup>, Drysdale K<sup>5</sup>, Fraser H<sup>1</sup>, Glass R<sup>8</sup>, Graham L<sup>11</sup>, Gunson R<sup>12</sup>, Hamilton E<sup>9</sup>, Harris H<sup>8</sup>, Harris M<sup>13</sup>, Harris R<sup>8</sup>, Heinsbroek E<sup>8</sup>, Hope V<sup>14</sup>, Horwood J<sup>1</sup>, Inglis S<sup>2</sup>, Innes H<sup>3</sup>, Lane A<sup>1</sup>, Meadows, J<sup>1</sup>, McAuley A<sup>7</sup>, Metcalfe C<sup>1</sup>, Migchelsen S<sup>8</sup>, Murray, A<sup>9</sup>, Myring G<sup>1</sup>, Palmateer N<sup>3</sup>, Presanis A<sup>4</sup>, Ramsay M<sup>8</sup>, Samartsidis P<sup>4</sup>, Simmons R<sup>8</sup>, Sinka K<sup>8</sup>, Vojt, G<sup>3</sup>, Ward Z<sup>1</sup>, Whiteley D<sup>15</sup>, Yeung, A<sup>3</sup>, Hutchinson S<sup>3</sup>

Correspondence to: Prof Matthew Hickman; [Matthew.Hickman@bristol.ac.uk](mailto:Matthew.Hickman@bristol.ac.uk)

**Affiliations**

1 Population Health Sciences, Bristol Medical School, University of Bristol

2 University of Dundee

3 Glasgow Caledonian University

4 MRC Biostatistics Unit, University of Cambridge

5 Barts Liver Centre, Queen Mary University of London

6 Tayside Health Board

7 Health Protection Scotland

8 Public Health England

9 Scottish Drug Forum

10 Division of Infectious Diseases and Global Public Health, University of California San Diego

11 Information Services Division, Scotland

12 West of Scotland Specialist Virology Centre, Glasgow Royal Infirmary

13 London School of Hygiene and Tropical Medicine

14 Liverpool John Moores University

15 Edinburgh Napier University

ISRCTN72038467

**ABSTRACT****Introduction:**

Hepatitis C Virus (HCV) is the second largest contributor to liver disease in the UK, with injecting drug use as the main risk factor among the estimated 200,000 people currently infected. Despite effective prevention interventions, chronic HCV prevalence remains at 40% among people who inject drugs (PWID). New Direct Acting Antiviral (DAA) HCV therapies combine high cure rates (>90%) and short treatment duration (8-12 weeks). Theoretical mathematical modelling evidence suggests HCV treatment scale-up can prevent transmission and substantially reduce HCV prevalence/incidence among PWID. Our primary aim is to generate empirical evidence on the effectiveness of HCV “Treatment as Prevention” (TasP) in PWID.

**Methods and Analysis**

We plan to establish a natural experiment with Tayside, Scotland, as a single intervention site where HCV care pathways are being expanded (including specialist drug treatment clinics, needle & syringe programmes (NSPs), pharmacies, and prison) and HCV treatment for PWID is being rapidly scaled-up. Other sites in Scotland and England will act as potential controls. Over two years from 2017/18, at least 500 PWID will be treated in Tayside, which simulation studies project will reduce chronic HCV prevalence among PWID by 62% (from 26% to 10%) and HCV incidence will fall by approximately 2/3 (from 4.2 per 100 person-years (p100py) to 1.4 p100py). Treatment response and re-infection rates will be monitored. We will conduct focus groups and interviews with service providers and patients that accept and decline treatment to identify barriers and facilitators in implementing TasP. We will conduct longitudinal interviews with up to 40 PWID to assess whether successful HCV treatment alters their perspectives on and engagement with drug treatment and recovery. Trained peer researchers will be involved in data collection and dissemination.

The primary outcome – chronic HCV prevalence in PWID – is measured using information from the Needle Exchange Surveillance Initiative (NESI) survey in Scotland and the Unlinked Anonymous Monitoring Programme (UAM) in England, conducted at least four times before and three times during and after the intervention. We will adapt Bayesian synthetic control methods (also called Causal Inference Models) to generate the cumulative impact of the intervention on chronic HCV prevalence and incidence. We will use a dynamic HCV transmission and economic model to evaluate the cost-effectiveness of the HCV TasP intervention, and to estimate the contribution of the scale up in HCV treatment to observed changes in HCV prevalence. Through the qualitative data we will systematically explore key mechanisms of TasP real world implementation from provider and patient perspectives to develop a manual for scaling up HCV treatment in other settings. We will compare qualitative accounts of drug treatment and recovery with a “virtual cohort” of PWID linking information on HCV treatment with Scottish Drug treatment databases to test whether DAA treatment improves drug treatment outcomes.

**Ethics and Dissemination**

Extending HCV community care pathways is covered by ethics (ERADICATE C, ISRCTN27564683, Super DOT C Trial [clinicaltrials.gov:NCT02706223](http://clinicaltrials.gov/NCT02706223)). Ethical approval for extra data collection from patients including health utilities and qualitative interviews has been granted (INSERT) and ISRCTN registration has been completed (INSERT). Our findings will have direct NHS and patient relevance;

1  
2  
3  
4  
5  
6  
7  
8  
9  
10  
11  
12  
13  
14  
15  
16  
17  
18  
19  
20  
21  
22  
23  
24  
25  
26  
27  
28  
29  
30  
31  
32  
33  
34  
35  
36  
37  
38  
39  
40  
41  
42  
43  
44  
45  
46  
47  
48  
49  
50  
51  
52  
53  
54  
55  
56  
57  
58  
59  
60

ISRCTN72038467

informing prioritization given to early HCV treatment for PWID. We will present findings to practitioners and policy makers, and support design of an evaluation of HCV TasP in England.

### Strengths and limitations of this study

1. Our control sites in the rest of Scotland and England were not randomised so there will be confounding and uncertainty in the intervention effect estimates. We consider our natural experiment design to be more robust than simple before and after studies and our preliminary simulation work suggests that we should have sufficient power to detect the large intervention effect that is planned.
2. HCV treatment and prevention strategy in UK (and Europe) is evolving - motivated both by WHO “elimination targets” and falling drug prices – and our control sites may increase treatment rates earlier than expected which will complicate the analyses and potentially dilute the intervention effect.
3. The counterfactual of “no HCV treatment scale-up” has to be generated by our transmission model so that we can estimate cost-effectiveness of the intervention in Tayside. This is not ideal but has become standard practice in economic models of HCV treatment interventions – especially as the benefit in terms of additional Quality of Life Years accrues and occurs over a prolonged period. We are using a dynamic model which means that the prevention benefit (in terms of HCV infections averted) can be incorporated into the cost-effectiveness calculations – which is essential in evaluating HCV interventions in people who inject drugs.
4. We are using peer researchers in the qualitative arm of patients’ perspectives on the intervention and on the impact of HCV treatment on addiction outcomes. This is novel but adds additional challenges. We have trained the interviewers and will be monitoring their performance of the interviewers to ensure consistent study quality – and will replace peers with our qualitative researcher if required.

ISRCTN72038467

## Introduction and Background:

Infection with Hepatitis C Virus (HCV) is a progressive disease that over 20-40 years can lead to liver cancer and premature death. HCV is the second largest contributor to liver disease in the UK and one of the few causes that is curable<sup>1</sup>. In the UK it is estimated that approximately 200,000 people are infected with HCV, over 85% of whom are people who inject or have injected drugs (PWID)<sup>2-5</sup>. Chronic HCV prevalence and incidence among PWID remains high in UK at 20-50% and 5 to 15 per 100 person- years respectively<sup>4 6-18</sup>. Prevention of HCV transmission among PWID is critical to long-term prevention of HCV related liver disease<sup>19</sup>.

We have reviewed the effectiveness of traditional primary prevention against HCV –opioid substitution treatment (OST) and needle and syringe programmes (NSPs)<sup>12 20-22</sup>. Ongoing exposure to OST and high-coverage NSPs can reduce the risk of HCV transmission by 50-80%<sup>12 22</sup>. In Scotland HCV incidence among PWID decreased from approximately 14 to 6 per 100 person- years from 2008/09 to 2011/12 coinciding with the launch of the Scottish HCV strategy and action plan which incorporated scale-up of harm reduction interventions and HCV treatment<sup>10 23</sup>. We estimated that 60% of this decline could be attributed to the scale-up of OST and NSP during the action plan and that 1,400 HCV infections were averted by 2015<sup>24</sup>. However, there was no appreciable reduction in overall anti-HCV prevalence over this short period, and there is some suggestion that incidence has increased recently to ~10 per 100 person years (<http://www.hps.scot.nhs.uk/resourcedocument.aspx?id=5863>). HCV transmission models suggest that primary prevention through NSP and OST alone is insufficient to achieve substantial reductions (of the order of 40% or more within ten years) in HCV prevalence among PWID in the UK<sup>25 26</sup>.

Prevention of hepatitis C disease and HCV transmission is now possible because highly effective, tolerable, short-course interferon-free direct acting antiviral therapies (DAAs) are available for all HCV genotypes with cure rates – defined as sustained virological response (SVR)- exceeding 90%<sup>27-29</sup>. We, and others, hypothesise that HCV Treatment scale-up for PWID, and resulting HCV Treatment as Prevention (TasP) could enhance other primary interventions and reduce HCV incidence and chronic prevalence to negligible levels (i.e. towards elimination as a major public health concern)<sup>30-35</sup>. TasP refers to the concept whereby future transmission is reduced by treating affected individuals<sup>36 37</sup>: in HIV TasP Antiretroviral Treatment reduces transmission because individuals have undetectable infection<sup>38</sup>; in HCV TasP people are cured so reducing opportunities for future transmission. World Health Organization (WHO) targets for HCV elimination, adopted by UK and other countries, aim to reduce HCV incidence by 80% and associated mortality by 65% by 2030<sup>39 40 41 42 43 44</sup>.

Clinical guidelines in Europe and US changed from recommending prioritising HCV treatment to people with moderate to severe liver disease towards removing any restrictions and recommending that people at risk of transmission irrespective of fibrosis stage are offered treatment<sup>45-49</sup>. Cost-effectiveness models that incorporate the population prevention benefit suggest early treatment should be prioritised to PWID over other patient groups (unless chronic HCV prevalence and transmission is very high)<sup>50</sup>. There is direct evidence that SVR following HCV treatment reduces liver disease progression and mortality risk<sup>51-53</sup>, but in two recent reviews we found no empirical evidence that HCV treatment scale-up has reduced chronic HCV prevalence and incidence in PWID populations<sup>36 37</sup>. In part this is because in most settings HCV treatment rates in PWID are too low and any changes generally too small to be detected, as we show in two studies of seven sites in UK<sup>7</sup> and an extension to 11 sites in Europe<sup>54</sup>. Until very recently in the UK, the annual number of HCV

ISRCTN72038467

1  
2  
3 DAA treatments was restricted -as drug costs could be expensive (>£10,000 per patient). There is  
4 the opportunity now to test whether scaling up HCV treatment will reduce chronic HCV prevalence  
5 and transmission among PWID<sup>44</sup>.  
6

7  
8 In a pilot study (“Eradicate C”) in Tayside we showed that we can increase HCV case-finding and  
9 engage and successfully treat PWID in the community<sup>55</sup>. Combining further studies on extending  
10 community HCV treatment pathways in Tayside and additional treatments provided by NHS Tayside  
11 and Scottish Government we can establish an immediate natural experiment (with Tayside as the  
12 intervention site and other sites in Scotland and England as controls) to test and generate UK  
13 empirical evidence on the and potential impact and cost-effectiveness of HCV “Treatment as  
14 Prevention” (TasP) in people who inject drugs (PWID). The UK is one of few countries worldwide to  
15 have an established nationwide surveillance system monitoring HCV infection among PWID<sup>9 12 17 22 56-</sup>  
16 <sup>60</sup>. This is undertaken through a series of cross-sectional voluntary anonymous surveys of PWID  
17 recruited at harm reduction services, referred to as the Unlinked Anonymous Monitoring  
18 Programme (UAM) in England and Wales and the Needle Exchange Surveillance Initiative (NESI) in  
19 Scotland<sup>61 62</sup>. In addition, the UK has established sentinel laboratory surveillance of HCV testing and  
20 national monitoring of HCV treatment<sup>8 63-65</sup>. The data collected in both UAM and NESI will be used to  
21 assess out outcome.  
22  
23  
24  
25

26  
27 Alongside a natural experiment in Tayside, we will collect information to assess the treatment  
28 facilitators and barriers. Historically it has proven very hard to engage PWID in HCV treatment<sup>66-69</sup>.  
29 Some barriers to engagement, such as poor efficacy or fear of interferon treatment side-effects, may  
30 be ameliorated by DAA therapy. However, other barriers such as mistrust of health services, stigma,  
31 and competing priorities faced by PWID may persist. In addition, providers may be reticent to refer  
32 or provide HCV treatment to PWID due to concerns about adherence, reinfection and perceptions of  
33 treatment ‘worth’<sup>70 71</sup>. It is expected that co-locating HCV treatment within existing services will  
34 reduce many system and provider level barriers to PWID accessing care<sup>66-68 72-77</sup>. However, this has  
35 not been tested in the context of community wide scale-up of interventions across multiple  
36 potential pathways. It is critical, therefore, that we understand how HCV TasP is embedded within  
37 the existing service landscape and incorporated into providers’ professional roles.  
38  
39  
40  
41  
42

43 Finally it has been hypothesised that successful HCV treatment in PWID may positively impact on  
44 understandings of self and identity and improve treatment of drug use disorders<sup>71 72 78-80</sup>. Accounts  
45 of ‘transformative’ outcomes extending beyond viral clearance alone include reference to reductions  
46 in drug and alcohol use, uptake of safer injecting practices, improved social relationships, enhanced  
47 sense of responsibility and self-worth. Hints of such collateral or indirect benefits are also found in  
48 quantitative studies reporting low re-infection rates and reductions in risky injecting behaviours  
49 among treated PWID<sup>81 82</sup>. We aim to test this hypothesis in our qualitative follow-up study and  
50 compare the findings to quantitative data generated from a virtual cohort.  
51  
52  
53  
54  
55  
56  
57  
58  
59  
60

ISRCTN72038467

## Methods and analysis:

### Study design

Our intention is to create and conduct a mixed methods study, including qualitative studies and economic evaluation, of a natural experiment of HCV Treatment as Prevention (TasP) among People who Inject Drugs (PWID). We also will develop methods for evaluating HCV TasP.

### Methods

#### Scaling-up HCV treatment

The **intervention** comprises the scale-up of HCV treatment in People Who Inject Drugs (PWID) which has started early in Tayside. . By combining support from Scottish Government, National Health Board Tayside (NHS Tayside) and industry (MSD, Gilead, BMS) we can deliver rapid intensive scale-up of HCV treatments for PWID (comprising an extra 400 HCV treatments, a 3.5-fold increase from treatments for PWID prior to April 2017, see sample size below). We have developed multiple integrated community HCV care pathways, including novel care pathways in pharmacies, a low threshold NSP, drug treatment services and prisons (see Figure 1). Our diagnostic pathways make extensive use of dried blood spot (DBS) testing for diagnosis of HCV antibody and chronic HCV with subsequent conventional laboratory testing in preparation for treatment (viral load, liver function and Fib4 fibrosis score)<sup>83-85</sup>.

#### Study population

Our intervention is delivered and measured at the population level – which we have created by combining several individual studies and treatment pathways as shown in Figure 1 (see ethics section below for the individual studies). We gained ethical approval East of Scotland Research Ethics Service REC 1 (ref: 18/ES/0128) to ask patients for permission to be recruited into the qualitative study (below) and extended clinical and behavioural drug history and data on health utilities (EQ5D-5L) at onset of treatment, during treatment and after the end of treatment.

Community HCV specialist nurses (3.5 FTE) coordinate and deliver case-finding and treatment across the pathways in Tayside (Figure 1).

*Figure 1: Overview of HCV testing and treatment pathways for the PWID population in NHS Tayside.*

The region of Tayside co-localises to NHS Tayside which is the provider of health care to a geographical area of 2,903 sq mi (7519 km<sup>2</sup>) including the cities of Dundee and Perth and the counties of Angus and Perth & Kinross, situated in the east of Scotland with a population of 416,000. It is a mixture of urban and rural environments with some of the most affluent and most deprived areas in Scotland. It is therefore a representative microcosm of many areas in the UK.

#### HCV treatment

Apart from expansion of community HCV care pathways, no new clinical procedures will be investigated and all PWID with chronic HCV will be offered oral DAA HCV treatment compliant with the Scottish clinical guidelines (<https://www.hps.scot.nhs.uk/resourcedocument.aspx?id=6621>).

ISRCTN72038467

As per local standard of care, participants will be offered appropriate harm reduction advice.

Standard care for patients is to test for SVR at 12 weeks after end of treatment with patients being recommended for annual follow-up if at risk of re-infection. Specialist nurses concentrate on building a good relationship with the participant to ensure that they do return for follow-up appointments. Health Protection Scotland collates national public health surveillance data on the number, characteristics and response of patients initiated onto HCV therapy, through Clinical Databases installed in 17 specialist HCV treatment centres, across Scotland<sup>41 86</sup>. A similar system also is available in England.

#### *HCV surveillance and Intervention Outcome (Chronic HCV in PWID)*

The **outcome** is chronic HCV prevalence (HCV viraemia as measured by HCV PCR) among PWID in the community (not just in the patients who undergo HCV treatment). Prevalence will be monitored using the NESI and UAM surveys, as detailed below. During 2017-22, three waves of data collection for NESI (n=7,500) and five to six for UAM (n=17,000 in England) will measure this outcome.

In our pre-intervention period from 2010/11 to 2016 there have been four NESI surveys in Scotland (n=10,000 participants in total) and six UAM surveys in England (n=16,000 in total), which have involved the collection of DBS linked to questionnaire data. Participants are recruited at sentinel sites by a team of trained interviewers in Scotland (at over 100 NSP sites) and by agency staff in over 60 low-threshold drug agencies across England<sup>58 61</sup>. Participants complete a short questionnaire, with common questions across UAM and NESI, on demographics, injecting behaviour and service utilisation, and importantly (in relation to quantifying the intervention effect) both survey approaches have remained consistent over time.

The DBS samples collected in NESI and UAM have all been tested for HCV antibody, using the same methods (where sensitivity and specificity of the assay on DBS are close to 100%)<sup>83 84</sup>, and illustrate that antibody prevalence (ever infection) has remained relatively stable among PWID during this time (Figure 2). PCR positivity among antibody positive samples is used to determine chronic infection.

All NESI and UAM samples will be tested for HCV antibody and RNA PCR to assess the impact of HCV therapy scale-up – which is critical as trends in chronic infection and antibody status will diverge as more people are cured. In addition, we will undertake RNA PCR testing of all historical samples that were HCV antibody positive shown in Figure 2 so that we can measure chronic HCV prevalence among PWID pre-, as well as post-, intervention for analysis (below)

*Figure 2: Trends in HCV antibody prevalence among PWID in Scotland and England 2010/11-16*

Data on HCV PCR positivity among antibody negative samples identify recent infections and is used to estimate HCV incidence – which has fluctuated between 5-10 infections per 100 person years across the UK during the last five years<sup>61</sup>. We will also estimate HCV incidence from our transmission dynamic models<sup>24 54</sup>.

## Sample size, Power, and Estimating Intervention Effect

We updated estimates of the prevalence of PWID in Tayside<sup>5</sup> which suggest there are 2,760 (95% Credible Interval, CrI 2,360-3,170) PWID either currently injecting and/or in OST. NESI data suggest



ISRCTN72038467

1  
2  
3 that approximately 30% have chronic HCV and over 75% of PWID with chronic HCV have been  
4 diagnosed. Prior to 2017 approximately 66 PWID were treated annually. From April 2017 we plan to  
5 treat at least 500 PWID in Tayside over 2 years (as a result of expanded community care pathways  
6 shown in Figure 1 and extra HCV treatments provided by NHS, Scottish Government and Industry  
7 funding). Adapting a transmission dynamic model that has been used in Tayside,<sup>87</sup> we hypothesize  
8 that within two years chronic HCV prevalence among PWID will reduce by approximately 62% from  
9 26% (95% CrI 20-32) to at least 10% and chronic HCV incidence will fall by approximately 2/3s from  
10 4.2 (95% CrI 2.4-7.1) per 100 person-years (p100py) to 1.4 (95%CrI 1.0 – 1.4) p100py (as shown in  
11 Figure 3). Modelling also suggests that maintaining these reductions after 2019 will require less than  
12 40 treatments per year.  
13  
14  
15

16 *Figure 3: Projected chronic HCV prevalence and incidence among PWID in Tayside with and without*  
17 *the intervention. Blue shaded area denotes the 95% credibility intervals of the model projections*  
18 *with and without the intervention*

19 We will adapt synthetic control methods or Causal Impact Model as proposed by Brodersen and  
20 colleagues<sup>88 89</sup>.

21  
22 We have performed simulation studies to test power and evaluate the utility of the CIM assuming  
23 information on chronic HCV prevalence among PWID (shown in Figure 4). Provided trends in the  
24 chronic HCV prevalence in the pre-intervention period are relatively stable (which is the case) there  
25 will be sufficient power to detect the projected reduction in chronic prevalence. For example, in  
26 Figure 4d we see that for a prevalence reduction of 40% by year 2-3 the credible intervals of the  
27 estimated cumulative effect (cumulative drop in prevalence) exclude zero, correctly identifying  
28 evidence of a successful intervention. Whereas a cumulative reduction of <20% is unlikely to be  
29 detected.  
30  
31  
32

33 *Figure 4: Causal Impact Synthetic Control Method (CIM) simulation and estimated intervention*  
34 *effects and 95% Credible Intervals for a range of assumed effects.*

35  
36  
37  
38 *Footnote:- Illustration of CIM. First subplot shows a single dataset, where solid lines represent the simulated*  
39 *prevalence in the absence of the intervention, and the dashed lines represent the outcome of treated site in the*  
40 *post intervention period under different intervention magnitude scenarios. For each one of the three scenarios,*  
41 *we calculate the estimated average intervention effect along with credible intervals. These are shown in*  
42 *Subplots 2-4. We see that as the effect increases, the intervals tend to move away from zero. However, the*  
43 *intervention effect only becomes significant in scenario 3, where zero is not included in any of the post-*  
44 *intervention time points.*  
45  
46  
47  
48

## 49 Qualitative Studies

### 50 Understanding the barriers and facilitators to scaling-up community-based HCV 51 treatment

52 The qualitative study design has two distinct arms focusing on the intervention providers, and the  
53 intervention recipients.  
54  
55  
56  
57  
58  
59  
60

1  
2  
3  
4  
5  
6  
7  
8  
9  
10  
11  
12  
13  
14  
15  
16  
17  
18  
19  
20  
21  
22  
23  
24  
25  
26  
27  
28  
29  
30  
31  
32  
33  
34  
35  
36  
37  
38  
39  
40  
41  
42  
43  
44  
45  
46  
47  
48  
49  
50  
51  
52  
53  
54  
55  
56  
57  
58  
59  
60

ISRCTN72038467

### *Intervention providers*

A purposive sample of 30 intervention providers, comprising nursing leads and key individuals from collaborating organisations will be approached directly by the lead hepatitis nurse. Seven focus groups will be convened according to professional role and locality:

- HCV healthcare specialists (nurses and physicians)
- Community pharmacists
- Prison staff (both healthcare and security)
- 'Drug workers' (from OST and NSP services)

Each focus group will consist of a maximum of six individuals and ideally comprise multi-agency mixed groups. Individual interviews by telephone will be offered for those hesitant to join a group (estimate 10 interviews). Topic guides informed by previous work in this area<sup>66 68 76 90</sup> will facilitate group discussion.

### *Intervention recipients – cross-sectional and longitudinal*

The intervention recipient arm of the study will comprise both cross-sectional and longitudinal elements. A cross-sectional approach will be employed to recruit 6-10 participants who do not take up the offer of treatment. These individuals will be recruited through the treatment pathways or through our peer researcher networks. The longitudinal element will follow a cohort of up to 40 individuals recruited following their course of HCV treatment. These individuals will be purposively sampled from the existing services in which HCV TasP has been embedded (i.e. pharmacy, prison and drug service), and then followed-up at one year post-treatment (with 70% expected to be followed-up)<sup>91</sup>. We aim to recruit women as well as men, younger and older people; those treated previously and first time; those injecting and not injecting at treatment onset. Follow-up interviews will explore collateral effects of HCV TasP including outcomes pertaining to drug use and injecting practices (secondary outcome below).

Participants will be recruited by hepatitis nurses or other clinical staff in Tayside and the face-to-face semi-structured interview will be conducted by peer-researchers, trained and guided by experienced qualitative researchers. Dr Magdalena Harris explains the importance of the use of peer researchers within the context of EPIToPe: <https://www.youtube.com/watch?v=9ZZo3fKOXlg>

<sup>92 93</sup>. The Scottish Drugs Forum (SDF) works with a group of Tayside peer-researchers with lived experience of injecting. Peer-researchers will receive study-orientated training and be provided with ongoing support to co-produce data and contribute to study outputs. A £20 shopping voucher will be offered to all interviewees except those in prison (Scottish prison service ethics did not permit thank you vouchers to prison participants).

### *Qualitative Data Analysis*

Interviews and focus-groups will be audio-recorded using encrypted digital voice recorders, transcribed verbatim and anonymised. *Nvivo* v.10 software will be used to code and manage qualitative data. First level analysis will be deductive, guided by the research questions, and peer researchers will be consulted for input and feedback during the analytical process<sup>94</sup>. A constant comparison method will be used to develop the thematic analysis and will reflect diverging and converging narratives, for example, across groups of intervention recipients at different time points in the treatment pathway, or between groups of intervention providers<sup>94</sup>. The findings will be

ISRCTN72038467

contextualised in the relevant theoretical perspectives which may include the diffusion of preventive innovations (staff) or social norms and values that might underpin health behaviour (recipients)<sup>95,96</sup>. We will assess TasP both from the providers' perspective and from patients' perspective including those who refuse treatment.

We will use the findings iteratively to update the HCV TasP logic model shown in Figure 5. Our qualitative data will be used to generate a manual of an optimal intervention for other sites in UK. In previous examples, such as [<https://www.youtube.com/channel/UCBV8smLmkQQVT9D0OR-md1g/videos>] we have used the Behaviour Change Wheel<sup>96</sup> as the framework to retrospectively analyse the success and failure of implementation within Tayside and then prospectively to formulate the optimal implementation intervention.

*Figure 5: Preliminary Logic Model HCV Treatment as Prevention (EPIToPe)*

## Mixed Method Study on drug use outcomes: OST retention, drug overdose, recovery, and social transformation

Health Protection Scotland (HPS) link data on diagnostic HCV tests in the four largest Scottish NHS boards (including Tayside)<sup>8</sup> and all persons undergoing HCV treatment in the Scottish HCV Clinical database<sup>97</sup> which are also linked with other databases (including deaths, hospitalisations and drug treatment)<sup>8,42,98-100</sup> and from 2018 Scotland's Prescribing Information System (PIS) which holds data on OST and NHS prison health database (Prison Vision)<sup>101-105</sup>. PWID attending drug services who were HCV diagnosed, compared to those who were not, are at increased risk of drug-related and other cause-specific morbidity/mortality<sup>106,107</sup>. Thus, we will create a virtual cohort of chronic HCV infected PWID (estimated to involve at least 600 individuals from Tayside and 3,000 from elsewhere) and through linkage identify those who have been treated and attained SVR with those who have not. We will assess and compare the following outcomes:- retention in drug treatment (determined through linkage to drug treatment and prescribing databases), drug- and alcohol- related morbidity/mortality (through linkage to all hospital admission and mortality databases), and other markers of relapse (through linkage to prisons database).

## Economic and impact evaluation

Infectious disease models can test the extent to which observed changes in disease transmission can be attributed to specific interventions,<sup>108-112</sup> and assess cost-effectiveness of interventions that avert secondary infections, i.e. have a population prevention benefit<sup>50,85,113-117</sup>. We will update and adapt a transmission model of HCV among PWID in Scotland and Tayside to model the impact of the HCV treatment intervention based on historical trends and new observations collected as part of this programme<sup>39,87</sup>. We will stratify the PWID population into current (injected in the previous year) and temporarily ceased (in OST and not injected in the previous year); as well as by duration of injecting (< 3 years, 3 to 9 years, 10+ years since onset), prevention intervention exposure (OST and/or high coverage NSP), and intervention settings for testing and treatment. We will use

ISRCTN72038467

1  
2  
3 Approximate Bayesian Computation to calibrate the model to pre-intervention trends in chronic HCV  
4 prevalence and incidence among PWID in Tayside. The model will simulate the impact of observed  
5 rates of HCV treatment and cure rates for the intervention period, also incorporating any changes in  
6 the coverage of OST and NSP and injecting risk behaviours.  
7  
8  
9

10 We will test consistency between the model impact projections and observed changes in HCV  
11 chronic prevalence and incidence from Tayside to disentangle the impact of HCV TasP from other  
12 interventions (OST/NSP) or epidemiological changes, and predict the impact of the TasP on number  
13 of HCV infections averted. If they are not consistent then alternative evidence-based hypotheses will  
14 be tested for why the model projects a different impact and the best fitting models will then be used  
15 to project the impact of the intervention. This will be assessed compared to two alternative  
16 counterfactuals where treatment rates are either at pre-scale-up levels in Tayside or at the average  
17 level achieved in other UK sites over the scale-up period. The impact of any changes in OST and NSP  
18 coverage will also be assessed to determine the contribution of those changes on observed effects.  
19 Impact will be assessed in terms of the relative decrease in prevalence and incidence, as well as the  
20 number and percent of infections averted in the intervention model projections compared to each  
21 counterfactual over different time frames. These model projections can also be taken forward to  
22 evaluate the possible impact of the intervention over next 5 or 10 years.  
23  
24  
25  
26  
27  
28

29 We will evaluate the cost-effectiveness of the intervention (HCV treatment scale-up) compared to  
30 status quo (expected rate of HCV case-finding and treatment among PWID in the rest of the UK)  
31 from a health care provider (NHS) perspective, with the cost-effectiveness of the different settings  
32 where case-finding occurs also being assessed. The cost-effectiveness (CE) model will be based on  
33 the same dynamic impact model, adapted to include HCV disease progression stages and tracking of  
34 health outcomes among PWID after cessation of injecting<sup>50</sup>. The economic evaluation will  
35 incorporate both individual benefits of HCV treatment (on disease progression) as well as population  
36 benefits (on HCV transmission). We will calculate the total number of infections and deaths over a  
37 50-year time horizon for the intervention and counterfactual scenario and estimate the costs and  
38 quality-adjusted life years (QALYs) based on the number of individuals in each disease stage per year  
39 in the model. We will discount all future costs and QALYs at 3.5% (NICE guidelines  
40 [https://www.nice.org.uk/process/pmg9/resources/guide-to-the-methods-of-technology-appraisal-  
41 2013-pdf-2007975843781](https://www.nice.org.uk/process/pmg9/resources/guide-to-the-methods-of-technology-appraisal-2013-pdf-2007975843781)). Probabilistic sensitivity analyses will be used to estimate the parametric  
42 uncertainty in the impact and cost projections. Cost-effectiveness results will be expressed in terms  
43 of incremental cost-effectiveness ratios (ICERs) and net monetary benefits (NMB) estimated using  
44 NICE thresholds (£20,000 and £30,000 per QALY). We will plot cost-effectiveness acceptability  
45 curves to determine the probability of the intervention being cost-effective compared to different  
46 willingness-to-pay thresholds. Analyses of covariance (ANCOVA) methods will be used to summarize  
47 the proportion of the variability in the incremental costs and QALYs explained by uncertainty in  
48 different input parameters. Univariate sensitivity analyses will consider the effect of changes in  
49 important parameters such as time horizon, treatment cost and discount rate.  
50  
51  
52  
53  
54  
55  
56

57 We focus on the incremental or additional resource costs associated with the intervention in  
58 Tayside. These costs, in part based on our earlier work for other studies, will include such things as  
59 the nurse time spent on intervention related activities (training other staff to offer HCV testing and  
60

ISRCTN72038467

1  
2  
3 treatment referral) as well as additional HCV testing and treatment costs, any additional OST costs  
4 due to HCV testing or treatment, and other staff time at the NSP, drug treatment centres and  
5 prisons involved with the intervention. Most of the incremental costs can be defined as variable  
6 (driven by extra nurse time and HCV testing/treatment costs). NHS HCV care costs and health  
7 utilities will be attached to each disease stage, based primarily on previous syntheses and models,  
8 which assume that PWID have a lower QoL than non-PWID of a similar age, gender and liver disease  
9 stage<sup>118-120</sup>. Additional data using the EQ-5D-5L tool during this study will generate new health utility  
10 data on the QoL amongst PWID before and after DAA treatment.  
11  
12  
13  
14  
15

## 16 Patient and Public Involvement

17  
18 Patient and Public Involvement (PPI) was led by the Hepatitis C Trust and supported by qualitative  
19 research assessing barriers and facilitators to HCV treatment access (led by Magdalena Harris). The  
20 Scottish Drug Forum (SDF) were also actively involved in the development of EPIToPe. The input  
21 from PPI groups has influenced the design of care pathways and has ensured that peer research is an  
22 essential element of the qualitative strand of EPIToPe.  
23  
24  
25

26  
27 A pilot NIHR funded study in England (HEPCAT) responding to NICE Guidance on Hepatitis Case  
28 Finding was co-designed with Hepatitis C trust. It showed that Hepatitis C Facilitators and peer  
29 support networks can increase the uptake of HCV case-finding and HCV treatment readiness in  
30 addiction services. This pilot study and our studies in Dundee/Tayside will influence how HCV  
31 treatment can be scaled up in England and our proposed evaluation HCV treatment as prevention.  
32  
33  
34

35  
36 Peer researchers will be trained to conduct the longitudinal study with PWID treated for HCV and  
37 will be involved and contribute to the analysis of the findings. Peer researchers and SDF will be  
38 members of the project management group and steering committee.  
39  
40  
41

42  
43 Dissemination events will be held in Dundee to discuss and present the findings from the qualitative  
44 studies with patient groups and services. These will be facilitated by SDF to support active  
45 contribution from our peer researchers. The study findings will be summarised and promoted  
46 through SDF website, social media platforms and through their sector-wide conferences in Scotland.  
47 Hepatitis Scotland, who are hosted within SDF, together with patient and public groups in England  
48 will take an active role in the wider national and international dissemination of the research, it's  
49 translation into patient meaningful materials and its integration into a national policy context. The  
50 research will also be promoted via Hepatitis C Trust and Public Health England.  
51  
52

## 53 Discussion

### 56 Strengths and limitations of this study

57  
58 Several limitations arise from the "natural experiment" design as our intervention and controls were  
59 not randomised. In the UK and many other countries there is no longer sufficient equipoise in  
60

ISRCTN72038467

1  
2  
3 clinicians and policymakers – given WHO and national strategies on HCV “elimination” - to mount an  
4 RCT of HCV Treatment as Prevention. As a result, there will be confounding and additional  
5 uncertainty in the measurement of the intervention effect. However, we consider that a natural  
6 experiment and use of synthetic control methods to be a more robust design than simple before and  
7 after studies. Our preliminary simulation work also suggests that we should have sufficient power to  
8 detect the large intervention effect that is planned.  
9

10  
11 We know also that HCV treatment and prevention strategy in UK (and Europe) is evolving -  
12 motivated both by WHO “elimination targets” and falling drug prices – and our control sites in  
13 Scotland and England may increase HCV treatment rates earlier than expected. This will complicate  
14 the analyses a little and potentially dilute the intervention effect. We are confident that we can  
15 adapt the synthetic control methods to take account of changes over time – and that because  
16 Tayside has started so early in scaling up HCV treatment that we will have time to detect a difference  
17 in the outcome.  
18  
19

20  
21 The lack of randomised controls means that we have to generate the counterfactual of “no HCV  
22 treatment scale-up” through our HCV transmission model so that we can subsequently estimate  
23 cost-effectiveness of the intervention in Tayside. This is not ideal but has become standard practice  
24 in economic models of novel HCV treatment interventions – and we are involved with the modelling  
25 of HCV treatment pathways through homeless centres, prison, A&E, pharmacies, specialist drug  
26 clinics, and NSPs (P Vickerman personal communication and e.g. <sup>55 85 121</sup>. We know also, however,  
27 that the benefit in terms of additional Quality of Life Years and averted HCV infections accrues and  
28 occurs over a prolonged period <sup>50</sup>. It is more critical for any economic evaluation of HCV  
29 interventions in PWID that a dynamic model is used so that the prevention benefit (in terms of HCV  
30 infections averted) is correctly accounted for.  
31  
32

33 We are using peer researchers in the qualitative arm of patients’ perspectives on the intervention  
34 and on the impact of HCV treatment on addiction outcomes. This is novel but adds additional  
35 challenges to obtaining NHS passports and ensuring data quality across the interviews and  
36 interviewees. We are also intending to support peers in analysis and interpretation of the findings  
37 which we believe has not been done before. We have trained the interviewers and will be  
38 monitoring their performance of the interviewers to ensure consistent study quality – and will  
39 replace peers with our qualitative researcher if required.  
40  
41  
42  
43  
44

## 45 Future Study: Natural experiment of TasP in England

46 In England HCV treatment is delivered through 22 operational delivery networks (ODNs). NHS  
47 England’s HCV strategy (2016-2019) prioritised 10,000 patients per year in line with the declared  
48 priorities of the network which could (and in many cases did) include people who use drugs at risk of  
49 transmission <sup>44</sup>. In October 2018 it is anticipated that a new procurement deal will substantially  
50 increase the number of patients who can access DAAs and this will enable ‘trace and treat’ options  
51 to be introduced. We will use the first part of EPIToPe including the manual generated by the  
52 qualitative study, enhancements to historical and ongoing surveillance of chronic HCV in PWID,  
53 infectious disease models, and methodological developments of causal impact model, to co-design  
54 with ODN leads a natural experiment of HCV TasP in England.  
55  
56  
57  
58

### 59 Authors’ contributions:

1 ISRCTN72038467  
2

3 All authors contributed to editing of the manuscript.  
4

5 M Hickman (MH) and S Hutchinson (SH) are co-PIs of EPIToPe and prepared first draft of the  
6 manuscript.  
7

8 J Dillon (JD) leads intervention scale-up in Tayside in collaboration with Tayside CTU (L Beer (LB), PT  
9 Donnan (PTD), S Inglis (SI) and A Eriksen (AE)).  
10

11 L Elliot (LE) leads qualitative component of EPIToPe in collaboration with Scottish Drug Forum (D  
12 Liddell (DL), E Hamilton (EH) and A Murray (AM)) and support from M Harris (MHa), G Vojt (GV) and  
13 D Whitely (DW) on qualitative research and training of peer support workers, and P Flowers (PF) on  
14 behavioural science.  
15

16 D De Angelis (DA) leads synthetic control estimation and multiple parameter evidence synthesis in  
17 collaboration with P Samartsidis (PS), R Harris (RA), A Presanis (AP), and N Martin (NM).  
18

19 P Vickerman (PV) leads dynamic impact and economic modelling in collaboration with NM, Z Ward  
20 (ZW), H Fraser (HF) with health economics led by W Hollingworth (WH), with G Myring (GM), as part  
21 of Bristol Randomised Trial Collaboration (BRTC) with advice on trial design from J Horwood (JH), C  
22 Metcalfe (CM) and A Lane (AL).  
23

24 G Foster (GF) is leading design of evaluation in England based on EPIToPe with support from BRTC  
25 and K Drysdale  
26

27 SH is leading on outcome measurement in Scotland with Health Protection Scotland (D Goldberg  
28 (DG), A McAuley (AMc)), and in collaboration with L Graham (LG) from ISD, R Gunson (RG), H Innes  
29 (HI), N Palmateer (NP) and A Yeung (AY).  
30

31 S Mandal (SM) and S Ijaz (SI) are leading on outcome measurement in England with R Glass (RG), H  
32 Harris (HH), E Heinsbroek (EH), V Hope (VH), S Migchelsen (SM), M Ramsay (MR), R Simmons (RS), K  
33 Sinka (SK).  
34

35 J Meadows (JM) is the Programme Manager.  
36  
37

38  
39 **Funding statement:** 'This paper presents independent research funded by the National Institute for  
40 Health Research (NIHR) under its Programme Grants for Applied Research Programme (Reference  
41 Number RP-PG-0616-20008). The views expressed are those of the author(s) and not necessarily  
42 those of the NHS, the NIHR or the Department of Health.'  
43

44  
45 In addition, we acknowledge support from NIHR Health Protection Research Unit in  
46 Evaluation, and the Bristol Randomised Trials Collaboration (BRTC), a UKCRC Registered Clinical  
47 Trials Unit in receipt of NIHR Clinical Trials Units (CTU) support funding. The views expressed are  
48 those of the author and not necessarily those of the NHS, the NIHR or the Department of Health and  
49 Social Care. NM is supported by the National Institute for Drug Abuse [grant number R01 DA037773]  
50 and the University of California San Diego Center for AIDS Research (CFAR), a National Institute of  
51 Health (NIH) funded program [grant number P30 AI036214].  
52

53  
54 We would like to thank all those involved in PPI from both SDF and the Hepatitis C Trust.  
55

56 **Competing interests statement.**

57 MH has received unrestricted honoraria for presenting at meetings from Abbvie, Gilead, MSD. NM  
58 has received unrestricted research grants and honoraria from Gilead and Merck. PV has received  
59  
60

1 ISRCTN72038467

2  
3 unrestricted honoraria for presenting at meetings from Abbvie and Gilead. PV has received  
4 unrestricted research grants from Gilead.  
5

6 **PTD has received unrestricted grants from Shire pharmaceuticals, Novo Nordisk and Gilead and is**  
7 **a member of the Scottish Medicines Consortium. HF has received an honorarium from MSD.**  
8  
9

10  
11  
12  
13  
14  
15  
16  
17  
18  
19  
20  
21  
22  
23  
24  
25  
26  
27  
28  
29  
30  
31  
32  
33  
34  
35  
36  
37  
38  
39  
40  
41  
42  
43  
44  
45  
46  
47  
48  
49  
50  
51  
52  
53  
54  
55  
56  
57  
58  
59  
60

For peer review only



ISRCTN72038467

## References

1. Williams R, Aspinall R, Bellis M, et al. Addressing liver disease in the UK: a blueprint for attaining excellence in health care and reducing premature mortality from lifestyle issues of excess consumption of alcohol, obesity, and viral hepatitis. *Lancet* 2014;384(9958):1953-97. doi: 10.1016/S0140-6736(14)61838-9
2. De Angelis D, Sweeting M, Ades A, et al. An evidence synthesis approach to estimating Hepatitis C prevalence in England and Wales. *Stat Methods Med Res* 2009;18(4):361-79. doi: 0962280208094691 [pii];10.1177/0962280208094691 [doi]
3. Harris RJ, Ramsay M, Hope VD, et al. Hepatitis C prevalence in England remains low and varies by ethnicity: an updated evidence synthesis. *Eur J Public Health* 2012;22(2):187-92. doi: ckr083 [pii];10.1093/eurpub/ckr083 [doi]
4. Hutchinson SJ, Roy KM, Wadd S, et al. Hepatitis C virus infection in Scotland: epidemiological review and public health challenges. *Scott Med J* 2006;51(2):8-15.
5. Prevost TC, Presanis AM, Taylor A, et al. Estimating the number of people with hepatitis C virus who have ever injected drugs and have yet to be diagnosed: an evidence synthesis approach for Scotland. *Addiction* 2015;110(8):1287-300. doi: 10.1111/add.12948
6. Hutchinson SJ, McIntyre PG, Molyneaux P, et al. Prevalence of hepatitis C among injectors in Scotland 1989-2000: declining trends among young injectors halt in the late 1990s. *Epidemiol Infect* 2002;128(3):473-77.
7. Martin NK, Foster GR, Vilar J, et al. HCV treatment rates and sustained viral response among people who inject drugs in seven UK sites: real world results and modelling of treatment impact. *J Viral Hepat* 2015;22(4):399. doi: 10.1111/jvh.12338
8. McLeod A, Weir A, Aitken C, et al. Rise in testing and diagnosis associated with Scotland's Action Plan on Hepatitis C and introduction of dried blood spot testing. *J Epidemiol Community Health* 2014;68(12):1182-8. doi: 10.1136/jech-2014-204451
9. Palmateer NE, Hutchinson SJ, Innes H, et al. Review and meta-analysis of the association between self-reported sharing of needles/syringes and hepatitis C virus prevalence and incidence among people who inject drugs in Europe. *Int J Drug Policy* 2013;24(2):85-100. doi: S0955-3959(12)00123-5 [pii];10.1016/j.drugpo.2012.08.006 [doi]
10. Palmateer NE, Taylor A, Goldberg DJ, et al. Rapid decline in HCV incidence among people who inject drugs associated with national scale-up in coverage of a combination of harm reduction interventions. *PLoS One* 2014;9(8):e104515. doi: 10.1371/journal.pone.0104515
11. Roy KM, Hutchinson SJ, Wadd S, et al. Hepatitis C virus infection among injecting drug users in Scotland: a review of prevalence and incidence data and the methods used to generate them. *Epidemiol Infect* 2007;135(3):433-42.
12. Turner KM, Hutchinson S, Vickerman P, et al. The impact of needle and syringe provision and opiate substitution therapy on the incidence of hepatitis C virus in injecting drug users: pooling of UK evidence. *Addiction* 2011;106(11):1978-88. doi: 10.1111/j.1360-0443.2011.03515.x [doi]
13. Harris RJ, Hope VD, Morongiu A, et al. Spatial mapping of hepatitis C prevalence in recent injecting drug users in contact with services. *Epidemiol Infect* 2011:1-10. doi: S0950268811001634 [pii];10.1017/S0950268811001634 [doi]
14. Hickman M, Hope V, Brady T, et al. Hepatitis C virus (HCV) prevalence, and injecting risk behaviour in multiple sites in England in 2004. *J Viral Hepat* 2007;14(9):645-52.
15. Hope VD, Hickman M, Ngui SL, et al. Measuring the incidence, prevalence and genetic relatedness of hepatitis C infections among a community recruited sample of injecting drug users, using dried blood spots. *J Viral Hepat* 2011;18:262-70. doi: JVH1297 [pii];10.1111/j.1365-2893.2010.01297.x [doi]

ISRCTN72038467

16. Sutton AJ, Gay NJ, Edmunds WJ, et al. Modelling the force of infection for hepatitis B and hepatitis C in injecting drug users in England and Wales. *BMC Infect Dis* 2006;6:93. doi: 1471-2334-6-93 [pii];10.1186/1471-2334-6-93 [doi]
17. Sweeting MJ, Hope VD, Hickman M, et al. Hepatitis C infection among injecting drug users in England and Wales (1992-2006): there and back again? *Am J Epidemiol* 2009;170(3):352-60. doi: kwp141 [pii];10.1093/aje/kwp141 [doi]
18. Wiessing L, Ferri M, Grady B, et al. Hepatitis C virus infection epidemiology among people who inject drugs in Europe: a systematic review of data for scaling up treatment and prevention. *PLoS One* 2014;9(7):e103345. doi: 10.1371/journal.pone.0103345
19. Hickman MM, N., editor. *Hepatitis C among drug users in Europe: epidemiology, treatment and prevention*. Lisbon: EMCDDA, 2016.
20. Van Den Berg C, Smit C, Van BG, et al. Full participation in harm reduction programmes is associated with decreased risk for human immunodeficiency virus and hepatitis C virus: evidence from the Amsterdam Cohort Studies among drug users. *Addiction* 2007;102(9):1454-62. doi: ADD1912 [pii];10.1111/j.1360-0443.2007.01912.x [doi]
21. Hagan H, Pouget ER, Des Jarlais DC. A systematic review and meta-analysis of interventions to prevent hepatitis C virus infection in people who inject drugs. *J Infect Dis* 2011;204(1):74-83. doi: jir196 [pii];10.1093/infdis/jir196 [doi]
22. Platt L, Reed J, Minozzi S, et al. Effectiveness of needle/syringe programmes and opiate substitution therapy in preventing HCV transmission among people who inject drugs. *Cochrane Database Syst Rev* 2016;2016(1) doi: 10.1002/14651858.CD012021
23. Hutchinson SJ, Dillon JF, Fox R, et al. Expansion of HCV treatment access to people who have injected drugs through effective translation of research into public health policy: Scotland's experience. *Int J Drug Policy* 2015 doi: 10.1016/j.drugpo.2015.05.019
24. Fraser H, Mukandavire C, Martin NK, et al. Modelling the impact of a national scale-up of interventions on hepatitis C virus transmission among people who inject drugs in Scotland. *Addiction* 2018 doi: 10.1111/add.14267 [published Online First: 2018/05/22]
25. de Vos AS, van der Helm JJ, Matser A, et al. Decline in incidence of HIV and hepatitis C virus infection among injecting drug users in Amsterdam; evidence for harm reduction? *Addiction* 2013;108(6):1070-81. doi: 10.1111/add.12125
26. Vickerman P, Martin N, Turner K, et al. Can needle and syringe programmes and opiate substitution therapy achieve substantial reductions in hepatitis C virus prevalence? Model projections for different epidemic settings. *Addiction* 2012;107(11):1984-95. doi: 10.1111/j.1360-0443.2012.03932.x [doi]
27. Dore GJ, Feld JJ. Hepatitis C virus therapeutic development: in pursuit of "perfectovir". *Clin Infect Dis* 2015;60(12):1829-36. doi: 10.1093/cid/civ197
28. Gogela NA, Lin MV, Wisocky JL, et al. Enhancing our understanding of current therapies for hepatitis C virus (HCV). *Curr HIV/AIDS Rep* 2015;12(1):68-78. doi: 10.1007/s11904-014-0243-7
29. Walker DR, Pedrosa MC, Manthena SR, et al. Early View of the Effectiveness of New Direct-Acting Antiviral (DAA) Regimens in Patients with Hepatitis C Virus (HCV). *Adv Ther* 2015;32(11):1117-27. doi: 10.1007/s12325-015-0258-5
30. Hellard M, Doyle JS, Sacks-Davis R, et al. Eradication of hepatitis C infection: The importance of targeting people who inject drugs. *Hepatology* 2014;59(2):366-69. doi: 10.1002/hep.26623
31. Hagan LM, Wolpe PR, Schinazi RF. Treatment as prevention and cure towards global eradication of hepatitis C virus. *Trends in Microbiology* 2013;21(12):625-33. doi: <http://dx.doi.org/10.1016/j.tim.2013.09.008>
32. Grebely J, Matthews GV, Lloyd AR, et al. Elimination of hepatitis C virus infection among people who inject drugs through treatment as prevention: feasibility and future requirements. *Clin Infect Dis* 2013;57(7):1014-20. doi: 10.1093/cid/cit377

ISRCTN72038467

- 1  
2  
3 33. Bruggmann P. Treatment as prevention: The breaking of taboos is required in the fight against  
4 hepatitis C among people who inject drugs. *Hepatology* 2013;58(5):1523-25. doi:  
5 10.1002/hep.26539  
6  
7 34. Martin NK, Vickerman P, Grebely J, et al. HCV treatment for prevention among people who inject  
8 drugs: Modeling treatment scale-up in the age of direct-acting antivirals. *Hepatology* 2013  
9 doi: 10.1002/hep.26431 [doi]  
10  
11 35. Wedemeyer H, Duberg AS, Buti M, et al. Strategies to manage hepatitis C virus (HCV) disease  
12 burden. *J Viral Hepat* 2014;21 Suppl 1:60-89. doi: 10.1111/jvh.12249  
13  
14 36. Martin NK, Vickerman P, Dore GJ, et al. The hepatitis C virus epidemics in key populations  
15 (including people who inject drugs, prisoners and MSM): the use of direct-acting antivirals as  
16 treatment for prevention. *Current opinion in HIV and AIDS* 2015;10(5):374-80. doi:  
17 10.1097/COH.000000000000179  
18  
19 37. Hickman M, De Angelis D, Vickerman P, et al. HCV Treatment as Prevention in People Who Inject  
20 Drugs—testing the evidence. *Current opinion in infectious diseases* 2015;28(6):576.  
21  
22 38. Hayes R, Ayles H, Beyers N, et al. HPTN 071 (PopART): rationale and design of a cluster-  
23 randomised trial of the population impact of an HIV combination prevention intervention  
24 including universal testing and treatment - a study protocol for a cluster randomised trial.  
25 *Trials* 2014;15:57. doi: 10.1186/1745-6215-15-57  
26  
27 39. Fraser H, Zibbell J, Hoerger T, et al. Scaling-up HCV prevention and treatment interventions in  
28 rural United States—model projections for tackling an increasing epidemic. *Addiction*  
29 2018;113(1):173-82. doi: 10.1111/add.13948 [published Online First: 2017/07/25]  
30  
31 40. Organization WH. Global Health Sector Strategy on Viral Hepatitis 2016-2021: Towards ending  
32 viral hepatitis. In: Organization WH, ed. Geneva: WHO, 2016.  
33  
34 41. Innes HA, McDonald SA, Dillon JF, et al. Toward a more complete understanding of the  
35 association between a hepatitis C sustained viral response and cause-specific outcomes.  
36 *Hepatology* 2015;62(2):355-64. doi: 10.1002/hep.27766  
37  
38 42. Innes HA, Hutchinson SJ, Allen S, et al. Excess liver-related morbidity of chronic hepatitis C  
39 patients, who achieve a sustained viral response, and are discharged from care. *Hepatology*  
40 2011;54(5):1547-58. doi: 10.1002/hep.24561  
41  
42 43. Innes H, Goldberg D, Dillon J, et al. Strategies for the treatment of Hepatitis C in an era of  
43 interferon-free therapies: what public health outcomes do we value most? *Gut* 2014 doi:  
44 10.1136/gutjnl-2014-308166  
45  
46 44. Harris RJ, Martin NK, Rand E, et al. New treatments for hepatitis C virus (HCV): scope for  
47 preventing liver disease and HCV transmission in England. *J Viral Hepat* 2016 doi:  
48 10.1111/jvh.12529  
49  
50 45. European Association for the Study of the L. EASL recommendations on treatment of hepatitis C  
51 2014. *J Hepatol* 2014;61(2):373-95. doi: 10.1016/j.jhep.2014.05.001  
52  
53 46. European Association for the Study of the Liver. Electronic address eee. EASL Recommendations  
54 on Treatment of Hepatitis C 2015. *J Hepatol* 2015;63(1):199-236. doi:  
55 10.1016/j.jhep.2015.03.025  
56  
57 47. Panel AIHG. Hepatitis C guidance: AASLD-IDSAs recommendations for testing, managing, and  
58 treating adults infected with hepatitis C virus. *Hepatology* 2015 doi: 10.1002/hep.27950  
59  
60 48. Grebely J, Robaey G, Bruggmann P, et al. Recommendations for the management of hepatitis C  
virus infection among people who inject drugs. *Int J Drug Policy* 2015;26(10):1028-38. doi:  
10.1016/j.drugpo.2015.07.005  
49. European Association for the Study of the Liver. Electronic address eee. EASL Recommendations  
on Treatment of Hepatitis C 2016. *J Hepatol* 2016 doi: 10.1016/j.jhep.2016.09.001  
50. Martin NK, Vickerman P, Dore GJ, et al. Prioritization of HCV treatment in the direct-acting  
antiviral era: An economic evaluation. *J Hepatol* 2016;65(1):17-25. doi:  
10.1016/j.jhep.2016.02.007

ISRCTN72038467

- 1
- 2
- 3
- 4 51. Aleman S, Rahbin N, Weiland O, et al. A risk for hepatocellular carcinoma persists long-term after
- 5 sustained virologic response in patients with hepatitis C-associated liver cirrhosis. *Clin Infect*
- 6 *Dis* 2013;57(2):230-6. doi: 10.1093/cid/cit234
- 7 52. van der Meer AJ, Veldt BJ, Feld JJ, et al. Association between sustained virological response and
- 8 all-cause mortality among patients with chronic hepatitis C and advanced hepatic fibrosis.
- 9 *JAMA* 2012;308(24):2584-93. doi: 10.1001/jama.2012.144878
- 10 53. Innes H, Hutchinson SJ, Obel N, et al. Liver mortality attributable to chronic hepatitis C virus
- 11 infection in Denmark and Scotland--using spontaneous resolvers as the benchmark
- 12 comparator. *Hepatology* 2016;63(5):1506-16. doi: 10.1002/hep.28458
- 13 54. Fraser H, Martin NK, Brummer-Korvenkontio H, et al. Model projections on the impact of HCV
- 14 treatment in the prevention of HCV transmission among people who inject drugs in Europe. *J*
- 15 *Hepatol* 2018;68(3):402-11. doi: 10.1016/j.jhep.2017.10.010 [published Online First:
- 16 2017/10/31]
- 17 55. Schulkind J, Stephens B, Ahmad F, et al. High response and re-infection rates among people who
- 18 inject drugs treated for hepatitis C in a community needle and syringe programme. *Journal*
- 19 *of Viral Hepatitis* 2018 doi: 10.1111/jvh.13035
- 20 56. MacArthur GJ, Minozzi S, Martin N, et al. Opiate substitution treatment and HIV transmission in
- 21 people who inject drugs: systematic review and meta-analysis. *BMJ* 2012;345:e5945.
- 22 57. MacArthur GJ, van VE, Palmateer N, et al. Interventions to prevent HIV and Hepatitis C in people
- 23 who inject drugs: A review of reviews to assess evidence of effectiveness. *IntJ Drug Policy*
- 24 2013 doi: S0955-3959(13)00116-3 [pii];10.1016/j.drugpo.2013.07.001 [doi]
- 25 58. Palmateer N, Hutchinson S, McAllister G, et al. Risk of transmission associated with sharing drug
- 26 injecting paraphernalia: analysis of recent hepatitis C virus (HCV) infection using cross-
- 27 sectional survey data. *J Viral Hepat* 2014;21(1):25-32. doi: 10.1111/jvh.12117
- 28 59. Palmateer N, Kimber J, Hickman M, et al. Evidence for the effectiveness of sterile injecting
- 29 equipment provision in preventing hepatitis C and human immunodeficiency virus
- 30 transmission among injecting drug users: a review of reviews. *Addiction* 2010;105(5):844-59.
- 31 doi: ADD2888 [pii];10.1111/j.1360-0443.2009.02888.x [doi]
- 32 60. Presanis AM, Gill ON, Chadborn TR, et al. Insights into the rise in HIV infections, 2001 to 2008: a
- 33 Bayesian synthesis of prevalence evidence. *AIDS* 2010;24(18):2849-58. doi:
- 34 10.1097/QAD.0b013e32834021ed [doi]
- 35 61. England PH. Hepatitis C in the UK 2016 report: Working towards its elimination as a major public
- 36 health threat. In: Harris HE, ed. London: Public Health England, 2016.
- 37 62. Health Protection Scotland UotWoS, Glasgow Caledonian University and the West of Scotland
- 38 Specialist Virology Centre. The Needle Exchange Surveillance Initiative: Prevalence of blood-
- 39 borne viruses and injecting risk behaviours among people who inject drugs attending
- 40 injecting equipment provision services in Scotland, 2008-09 to 2015-16. In: Scotland HP, ed.
- 41 Glasgow, 2017.
- 42 63. Brant LJ, Hurrelle M, Balogun MA, et al. Sentinel laboratory surveillance of hepatitis C antibody
- 43 testing in England: understanding the epidemiology of HCV infection. *Epidemiol Infect*
- 44 2007;135(3):417-26. doi: 10.1017/S0950268806006832
- 45 64. Brant LJ, Hurrelle M, Balogun MA, et al. Where are people being tested for anti-HCV in England?
- 46 Results from sentinel laboratory surveillance. *J Viral Hepat* 2008;15(10):729-39. doi:
- 47 10.1111/j.1365-2893.2008.01000.x
- 48 65. Lattimore S, Irving W, Collins S, et al. Using surveillance data to determine treatment rates and
- 49 outcomes for patients with chronic hepatitis C virus infection. *Hepatology* 2014;59(4):1343-
- 50 50. doi: 10.1002/hep.26926
- 51 66. Treloar C, Newland J, Rance J, et al. Uptake and delivery of hepatitis C treatment in opiate
- 52 substitution treatment: perceptions of clients and health professionals. *J Viral Hepat*
- 53 2010;17(12):839-44. doi: JVH1250 [pii];10.1111/j.1365-2893.2009.01250.x [doi]
- 54
- 55
- 56
- 57
- 58
- 59
- 60

ISRCTN72038467

- 1  
2  
3  
4  
5  
6  
7  
8  
9  
10  
11  
12  
13  
14  
15  
16  
17  
18  
19  
20  
21  
22  
23  
24  
25  
26  
27  
28  
29  
30  
31  
32  
33  
34  
35  
36  
37  
38  
39  
40  
41  
42  
43  
44  
45  
46  
47  
48  
49  
50  
51  
52  
53  
54  
55  
56  
57  
58  
59  
60
67. Treloar C, Rance J, Dore GJ, et al. Barriers and facilitators for assessment and treatment of hepatitis C virus infection in the opioid substitution treatment setting: insights from the ETHOS study. *J Viral Hepat* 2014;21(8):560-7. doi: 10.1111/jvh.12183
68. Harris M, Rhodes T. Hepatitis C treatment access and uptake for people who inject drugs: a review mapping the role of social factors. *Harm Reduct J* 2013;10:7. doi: 10.1186/1477-7517-10-7
69. Swan D, Long J, Carr O, et al. Barriers to and facilitators of hepatitis C testing, management, and treatment among current and former injecting drug users: a qualitative exploration. *AIDS Patient Care STDS* 2010;24(12):753-62. doi: 10.1089/apc.2010.0142
70. Rhodes T, Harris M, Martin A. Negotiating access to medical treatment and the making of patient citizenship: the case of hepatitis C treatment. *Sociol Health Illn* 2013;35(7):1023-44. doi: 10.1111/1467-9566.12018
71. Harris M, Albers E, Swan T. The promise of treatment as prevention for hepatitis C: Meeting the needs of people who inject drugs? *Int J Drug Policy* 2015;26(10):963-9. doi: 10.1016/j.drugpo.2015.05.005
72. Rance J, Treloar C, Group ES. 'Not just methadone Tracy': transformations in service-user identity following the introduction of hepatitis C treatment into Australian opiate substitution settings. *Addiction* 2014;109(3):452-9.
73. Treloar C, Rance J, Backmund M. Understanding barriers to hepatitis C virus care and stigmatization from a social perspective. *Clin Infect Dis* 2013;57 Suppl 2:S51-5. doi: 10.1093/cid/cit263
74. Treloar C, Rance J, Bryant J, et al. Harm reduction workers and the challenge of engaging couples who inject drugs in hepatitis C prevention. *Drug Alcohol Depend* 2016;168:170-75. doi: 10.1016/j.drugalcdep.2016.09.010
75. Treloar C, Rance J, Bryant J, et al. Understanding decisions made about hepatitis C treatment by couples who inject drugs. *J Viral Hepat* 2016;23(2):89-95. doi: 10.1111/jvh.12451
76. Jack K, Islip N, Linsley P, et al. Prison officers' views about hepatitis C testing and treatment: A qualitative enquiry. *J Clin Nurs* 2016 doi: 10.1111/jocn.13489
77. Rich ZC, Chu C, Mao J, et al. Facilitators of HCV treatment adherence among people who inject drugs: a systematic qualitative review and implications for scale up of direct acting antivirals. *BMC Public Health* 2016;16:994. doi: 10.1186/s12889-016-3671-z
78. Clark JA, Gifford AL. Resolute efforts to cure hepatitis C: Understanding patients' reasons for completing antiviral treatment. *Health (London)* 2015;19(5):473-89. doi: 10.1177/1363459314555237
79. Batchelder AW, Peyser D, Nahvi S, et al. "Hepatitis C treatment turned me around:" Psychological and behavioral transformation related to hepatitis C treatment. *Drug Alcohol Depend* 2015;153:66-71. doi: 10.1016/j.drugalcdep.2015.06.007
80. Harris M. Managing expense and expectation in a treatment revolution: Problematizing prioritisation through an exploration of hepatitis C treatment 'benefit'. *Int J Drug Policy* 2017;47:161-68. doi: 10.1016/j.drugpo.2017.03.015 [published Online First: 2017/04/30]
81. Aspinall EJ, Hutchinson SJ, Janjua NZ, et al. Trends in mortality after diagnosis of hepatitis C virus infection: an international comparison and implications for monitoring the population impact of treatment. *J Hepatol* 2015;62(2):269-77. doi: 10.1016/j.jhep.2014.09.001
82. Aspinall EJ, Corson S, Doyle JS, et al. Treatment of hepatitis C virus infection among people who are actively injecting drugs: a systematic review and meta-analysis. *Clin Infect Dis* 2013;57 Suppl 2:S80-9. doi: 10.1093/cid/cit306
83. Judd A, Parry J, Hickman M, et al. Evaluation of a modified commercial assay in detecting antibody to hepatitis C virus in oral fluids and dried blood spots. *J Med Virol* 2003;71(1):49-55.

ISRCTN72038467

- 1  
2  
3  
4  
5  
6  
7  
8  
9  
10  
11  
12  
13  
14  
15  
16  
17  
18  
19  
20  
21  
22  
23  
24  
25  
26  
27  
28  
29  
30  
31  
32  
33  
34  
35  
36  
37  
38  
39  
40  
41  
42  
43  
44  
45  
46  
47  
48  
49  
50  
51  
52  
53  
54  
55  
56  
57  
58  
59  
60
84. Bennett S, Gunson RN, McAllister GE, et al. Detection of hepatitis C virus RNA in dried blood spots. *J Clin Virol* 2012;54(2):106-09. doi: S1386-6532(12)00053-4 [pii];10.1016/j.jcv.2012.02.004 [doi]
  85. Martin NK, Vickerman P, Brew IF, et al. Is increased hepatitis C virus case-finding combined with current or 8-week to 12-week direct-acting antiviral therapy cost-effective in UK prisons? A prevention benefit analysis. *Hepatology* 2016;63(6):1796-808. doi: 10.1002/hep.28497
  86. McDonald SA, Innes HA, Hayes PC, et al. What is the impact of a country-wide scale-up in antiviral therapy on the characteristics and sustained viral response rates of patients treated for hepatitis C? *J Hepatol* 2015;62(2):262-8. doi: 10.1016/j.jhep.2014.08.046 [published Online First: 2014/09/10]
  87. Ward Z, Platt L, Sweeney S, et al. Impact of current and scaled-up levels of hepatitis C prevention and treatment interventions for people who inject drugs in three UK settings-what is required to achieve the WHO's HCV elimination targets? *Addiction* 2018 doi: 10.1111/add.14217 [published Online First: 2018/05/19]
  88. Brodersen KH, Gallusser F, Koehler J, et al. Inferring causal impact using Bayesian structural time-series models. 2015:247-74. doi: 10.1214/14-AOAS788
  89. Scott S VH. Predicting the present with bayesian structural time series. *International Journal of Mathematical Modelling and Numerical Optimisation* 2014;2014(5):23.
  90. Rance J, Newland J, Hopwood M, et al. The politics of place(ment): problematising the provision of hepatitis C treatment within opiate substitution clinics. *Soc Sci Med* 2012;74(2):245-53. doi: S0277-9536(11)00644-7 [pii];10.1016/j.socscimed.2011.10.003 [doi]
  91. Lankenau SE, Sanders B, Hathazi D, et al. Recruiting and retaining mobile young injection drug users in a longitudinal study. *Subst Use Misuse* 2010;45(5):684-99. doi: 10.3109/10826081003594914
  92. Stewart KE, Wright PB, Sims D, et al. The "translators": engaging former drug users as key research staff to design and implement a risk reduction program for rural cocaine users. *Subst Use Misuse* 2012;47(5):547-54. doi: 10.3109/10826084.2011.644379
  93. Harris M. "Three in the Room": Embodiment, Disclosure, and Vulnerability in Qualitative Research. *Qual Health Res* 2015;25(12):1689-99. doi: 10.1177/1049732314566324
  94. Braun V, Clarke V. Using thematic analysis in psychology. *Qualitative Research in Psychology* 2006;3(2):77-101. doi: 10.1191/1478088706qp063oa
  95. Rogers EM. Diffusion of preventive innovations. *Addict Behav* 2002;27(6):989-93.
  96. Cane J, O'Connor D, Michie S. Validation of the theoretical domains framework for use in behaviour change and implementation research. *Implement Sci* 2012;7:37. doi: 10.1186/1748-5908-7-37
  97. Innes HA, Hutchinson SJ, Allen S, et al. Ranking predictors of a sustained viral response for patients with chronic hepatitis C treated with pegylated interferon and ribavirin in Scotland. *Eur J Gastroenterol Hepatol* 2012;24(6):646-55. doi: 10.1097/MEG.0b013e32835201a4
  98. McDonald SA, Hutchinson SJ, Bird SM, et al. Excess morbidity in the hepatitis C-diagnosed population in Scotland, 1991-2006. *Epidemiol Infect* 2011;139(3):344-53. doi: 10.1017/S0950268810001421
  99. McDonald SA, Hutchinson SJ, Bird SM, et al. A record-linkage study of the development of hepatocellular carcinoma in persons with hepatitis C infection in Scotland. *Br J Cancer* 2008;99(5):805-10.
  100. McDonald SA, Hutchinson SJ, Bird SM, et al. A population-based record linkage study of mortality in hepatitis C-diagnosed persons with or without HIV coinfection in Scotland. *Stat Methods Med Res* 2009;18(3):271-83. doi: 10.1177/0962280208094690
  101. Gao L, Dimitropoulou P, Robertson JR, et al. Risk-factors for methadone-specific deaths in Scotland's methadone-prescription clients between 2009 and 2013. *Drug Alcohol Depend* 2016;167:214-23. doi: 10.1016/j.drugalcdep.2016.08.627

ISRCTN72038467

- 1  
2  
3 102. Bird SM, Fischbacher CM, Graham L, et al. Impact of opioid substitution therapy for Scotland's  
4 prisoners on drug-related deaths soon after prisoner release. *Addiction* 2015;110(10):1617-  
5 24. doi: 10.1111/add.12969  
6  
7 103. Bird SM, Hutchinson SJ. Male drugs-related deaths in the fortnight after release from prison:  
8 Scotland, 1996-99. *Addiction* 2003;98(2):185-90.  
9  
10 104. Alvarez-Madrado S, McTaggart S, Nangle C, et al. Data Resource Profile: The Scottish National  
11 Prescribing Information System (PIS). *Int J Epidemiol* 2016;45(3):714-15f. doi:  
12 10.1093/ije/dyw060  
13  
14 105. Graham L, Fischbacher CM, Stockton D, et al. Understanding extreme mortality among  
15 prisoners: a national cohort study in Scotland using data linkage. *Eur J Public Health*  
16 2015;25(5):879-85. doi: 10.1093/eurpub/cku252  
17  
18 106. Merrall EL, Bird SM, Hutchinson SJ. Mortality of those who attended drug services in Scotland  
19 1996-2006: record-linkage study. *Int J Drug Policy* 2012;23(1):24-32. doi:  
20 10.1016/j.drugpo.2011.05.010  
21  
22 107. McDonald SA, Hutchinson SJ, Bird SM, et al. Hospitalisation for an alcohol-related cause among  
23 injecting drug users in Scotland: increased risk following diagnosis with hepatitis C infection.  
24 *Int J Drug Policy* 2011;22(1):63-9. doi: 10.1016/j.drugpo.2010.04.003  
25  
26 108. de Vos AS, Prins M, Kretzschmar ME. Hepatitis C virus treatment as prevention among injecting  
27 drug users: who should we cure first? *Addiction* 2015;110(6):975-83. doi:  
28 10.1111/add.12842  
29  
30 109. Boily MC, Lowndes CM, Vickerman P, et al. Evaluating large-scale HIV prevention interventions:  
31 study design for an integrated mathematical modelling approach. *Sex Transm Infect*  
32 2007;83(7):582-89. doi: sti.2007.027516 [pii];10.1136/sti.2007.027516 [doi]  
33  
34 110. Boily MC, Pickles M, Lowndes CM, et al. Positive impact of a large-scale HIV prevention program  
35 among female sex workers and clients in Karnataka state, India. *AIDS* 2013 doi:  
36 10.1097/QAD.0b013e32835fba81 [doi]  
37  
38 111. Hallett TB, Gregson S, Mugurungi O, et al. Assessing evidence for behaviour change affecting  
39 the course of HIV epidemics: a new mathematical modelling approach and application to  
40 data from Zimbabwe. *Epidemics* 2009;1(2):108-17. doi: 10.1016/j.epidem.2009.03.001  
41  
42 112. Pickles M, Boily MC, Vickerman P, et al. Assessment of the population-level effectiveness of the  
43 Avahan HIV-prevention programme in South India: a preplanned, causal-pathway-based  
44 modelling analysis. *Lancet Glob Health* 2013;1(5):e289-99. doi: 10.1016/S2214-  
45 109X(13)70083-4  
46  
47 113. Martin NK, Hickman M, Miners A, et al. Cost-effectiveness of HCV case-finding for people who  
48 inject drugs via dried blood spot testing in specialist addiction services and prisons. *BMJ*  
49 *open* 2013;3(8) doi: 10.1136/bmjopen-2013-003153  
50  
51 114. Martin NK, Miners A, Vickerman P. Assessing the cost-effectiveness of interventions aimed at  
52 promoting and offering hepatitis C testing to injecting drug users: An economic modelling  
53 report. London, 2012.  
54  
55 115. Martin NK, Pitcher AB, Vickerman P, et al. Optimal control of hepatitis C antiviral treatment  
56 programme delivery for prevention amongst a population of injecting drug users. *PLoS One*  
57 2011;6(8):e22309. doi: 10.1371/journal.pone.0022309 [doi];PONE-D-10-01568 [pii]  
58  
59 116. Martin NK, Vickerman P, Miners A, et al. The cost-effectiveness of HCV antiviral treatment for  
60 injecting drug user populations. *Hepatology* 2012;55(1):49-57. doi: 10.1002/hep.24656 [doi]  
117. Martin NK, Vickerman P, Miners A, et al. How cost-effective is hepatitis C virus treatment for  
people who inject drugs? *Journal of gastroenterology and hepatology* 2013;28(4):590-2. doi:  
10.1111/jgh.12113  
118. Kimber J, Copeland L, Hickman M, et al. Survival and cessation in injecting drug users:  
prospective observational study of outcomes and effect of opiate substitution treatment.  
*BMJ* 2010;341:c3172.  
119. McDonald SA, Hutchinson SJ, Palmateer NE, et al. Decrease in health-related quality of life  
associated with awareness of hepatitis C virus infection among people who inject drugs in

ISRCTN72038467

- 1  
2  
3 Scotland. *JHepatol* 2013;58(3):460-66. doi: S0168-8278(12)00836-7  
4 [pii];10.1016/j.jhep.2012.11.004 [doi]  
5  
6 120. Wright M, Grieve R, Roberts J, et al. Health benefits of antiviral therapy for mild chronic  
7 hepatitis C: randomised controlled trial and economic evaluation. *Health Technol Assess*  
8 2006;10(21):1-113, iii. doi: 95-24-03 [pii]  
9  
10 121. Harrison GI, Murray K, Gore R, et al. The Hepatitis C Awareness Through to Treatment  
11 (HepCATT) study: Improving the cascade of care for hepatitis C virus-infected people who  
12 inject drugs in England. *Addiction* 2019 doi: 10.1111/add.14569 [published Online First:  
13 2019/01/30]  
14  
15  
16  
17  
18  
19  
20  
21  
22  
23  
24  
25  
26  
27  
28  
29  
30  
31  
32  
33  
34  
35  
36  
37  
38  
39  
40  
41  
42  
43  
44  
45  
46  
47  
48  
49  
50  
51  
52  
53  
54  
55  
56  
57  
58  
59  
60

For peer review only





PWID defined as those who either (a) are currently injecting drugs, (b) have ever injected drugs and are currently on opioid substitute therapy, or (c) have ever injected drugs and are currently in prison

DBS: dried blood spot; OST: opioid substitution therapies; PWID: people who inject drugs

Peer review only

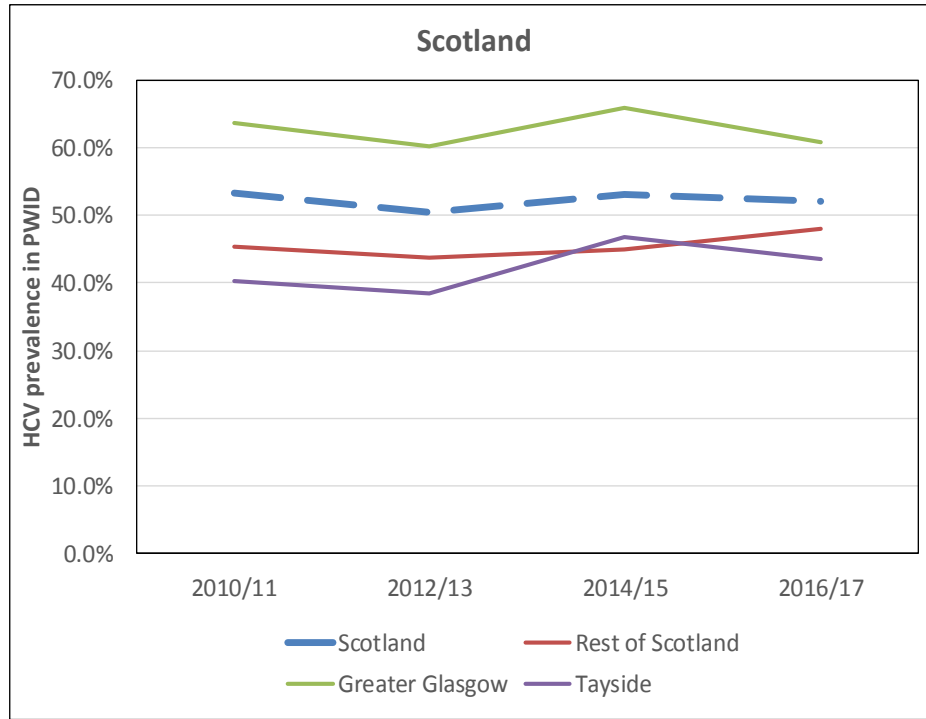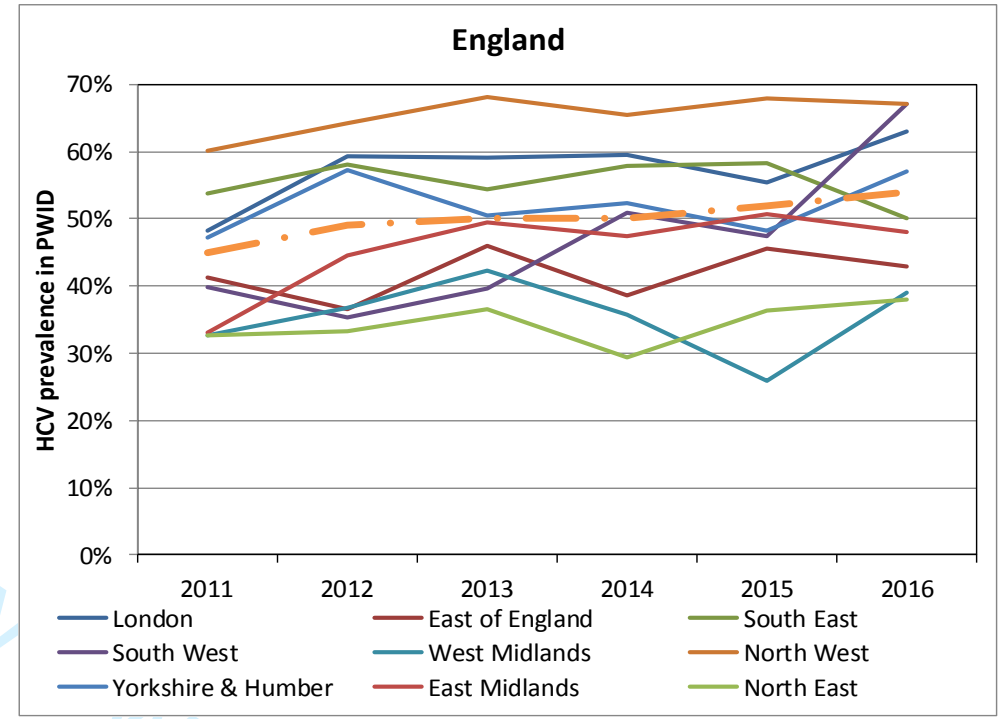



view only

1  
2  
3  
4  
5  
6  
7  
8  
9  
10  
11  
12  
13  
14  
15  
16  
17  
18  
19  
20  
21  
22  
23  
24  
25  
26  
27  
28  
29  
30  
31  
32  
33  
34  
35  
36  
37  
38  
39  
40  
41  
42  
43  
44  
45  
46



Reduction 10%–20%–20%

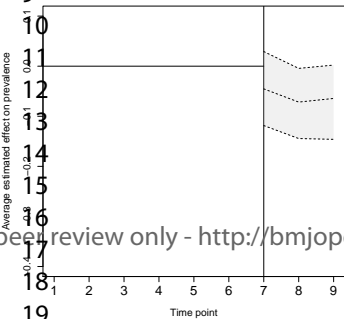

Reduction 20%–40%–40%

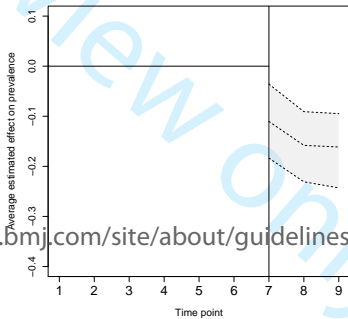

1  
2  
3  
4  
5  
6  
7  
8  
9  
10  
11  
12  
13  
14  
15  
16  
17  
18  
19  
20  
21  
22  
23  
24  
25  
26  
27  
28  
29  
30  
31  
32  
33  
34  
35  
36  
37  
38  
39  
40  
41  
42  
43  
44  
45  
46

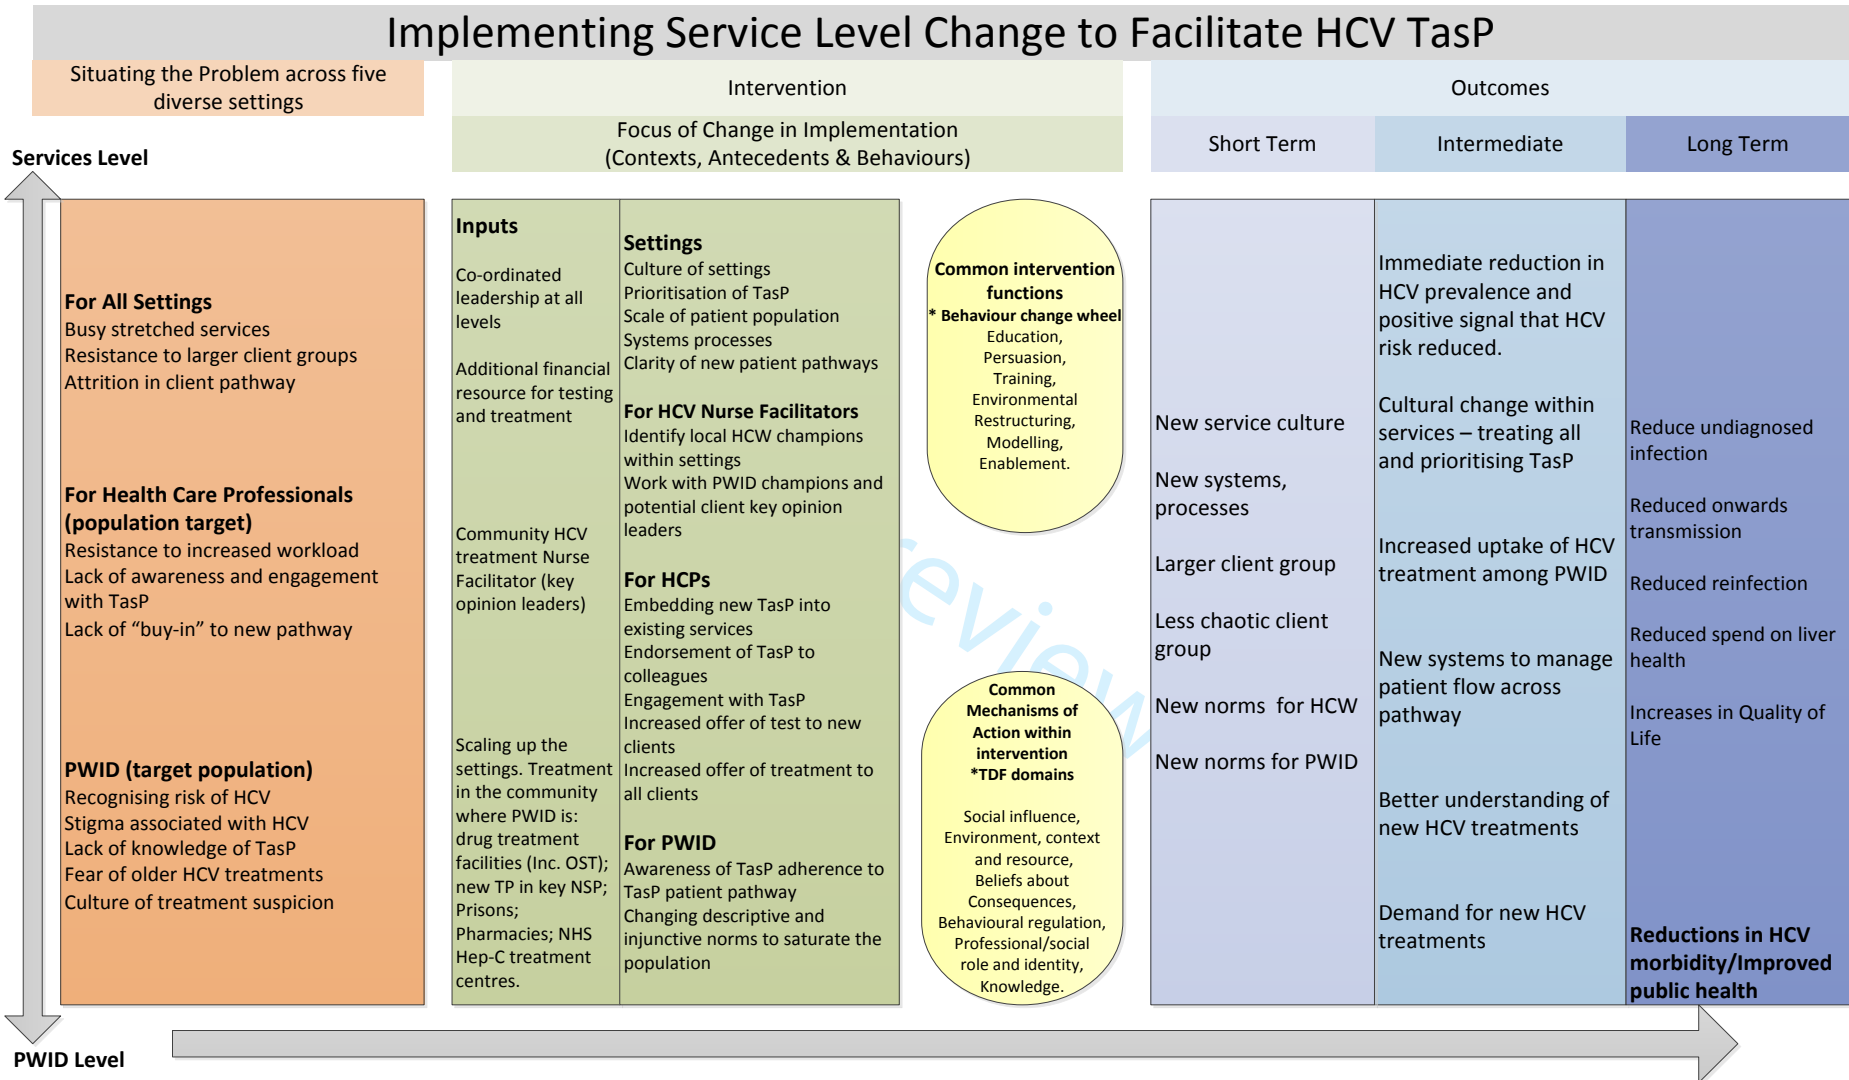

# BMJ Open

## Evaluating the Population Impact of Hepatitis C Direct Acting Antiviral Treatment as Prevention for People Who Inject Drugs (EPIToPe) – a natural experiment (Protocol)

|                               |                                                                                                                                                                                                                                                                                                                                                                                                                                                                                                                                                                                                                                                                                                                                                                                                                                                                                                                                                                                                                                                                                                                                                                                                                                                                                                                                                                                                                                                                                                                                                                                                                                                                                                                                                                                                                                                                                                                                                                                                                                                                        |
|-------------------------------|------------------------------------------------------------------------------------------------------------------------------------------------------------------------------------------------------------------------------------------------------------------------------------------------------------------------------------------------------------------------------------------------------------------------------------------------------------------------------------------------------------------------------------------------------------------------------------------------------------------------------------------------------------------------------------------------------------------------------------------------------------------------------------------------------------------------------------------------------------------------------------------------------------------------------------------------------------------------------------------------------------------------------------------------------------------------------------------------------------------------------------------------------------------------------------------------------------------------------------------------------------------------------------------------------------------------------------------------------------------------------------------------------------------------------------------------------------------------------------------------------------------------------------------------------------------------------------------------------------------------------------------------------------------------------------------------------------------------------------------------------------------------------------------------------------------------------------------------------------------------------------------------------------------------------------------------------------------------------------------------------------------------------------------------------------------------|
| Journal:                      | <i>BMJ Open</i>                                                                                                                                                                                                                                                                                                                                                                                                                                                                                                                                                                                                                                                                                                                                                                                                                                                                                                                                                                                                                                                                                                                                                                                                                                                                                                                                                                                                                                                                                                                                                                                                                                                                                                                                                                                                                                                                                                                                                                                                                                                        |
| Manuscript ID                 | bmjopen-2019-029538.R2                                                                                                                                                                                                                                                                                                                                                                                                                                                                                                                                                                                                                                                                                                                                                                                                                                                                                                                                                                                                                                                                                                                                                                                                                                                                                                                                                                                                                                                                                                                                                                                                                                                                                                                                                                                                                                                                                                                                                                                                                                                 |
| Article Type:                 | Protocol                                                                                                                                                                                                                                                                                                                                                                                                                                                                                                                                                                                                                                                                                                                                                                                                                                                                                                                                                                                                                                                                                                                                                                                                                                                                                                                                                                                                                                                                                                                                                                                                                                                                                                                                                                                                                                                                                                                                                                                                                                                               |
| Date Submitted by the Author: | 25-Jul-2019                                                                                                                                                                                                                                                                                                                                                                                                                                                                                                                                                                                                                                                                                                                                                                                                                                                                                                                                                                                                                                                                                                                                                                                                                                                                                                                                                                                                                                                                                                                                                                                                                                                                                                                                                                                                                                                                                                                                                                                                                                                            |
| Complete List of Authors:     | <p>Hickman, M; Bristol<br/> Dillon, John; University of Dundee Division of Cardiovascular and Diabetes Medicine, Liver Group<br/> Elliott, Lawrie; Glasgow Caledonian University, Department of Nursing and Community Health<br/> De Angelis, Daniela; MRC Biostatistics Unit<br/> Vickerman, Peter; London School of Hygiene and Tropical Medicine; University of Bristol, School of Social and Community Medicine<br/> Foster, Graham; Barts and The London School of Medicine<br/> Donnan, Peter; University of Dundee, Dundee Epidemiology and Biostatistics Unit<br/> Eriksen, Ann; Tayside Health Board<br/> Flowers, Paul; Glasgow Caledonian University,<br/> Goldberg, David; Health Protection Scotland<br/> Hollingworth, William; University of Bristol, School of Social and Community Medicine<br/> Ijaz, Samreen; Public Health England Centre for Infection<br/> Liddell, David; Scottish Drugs Forum<br/> Mandal, Sema; Public Health England, Immunisation, Hepatitis, Blood Safety and Countermeasures Response; National Institute for Health Research Health Protection Unit<br/> Martin, Natasha; University of California, San Diego<br/> Beer, Lewis; University of Dundee, Tayside Clinical Trials Unit<br/> Drysdale, Kate; Barts Health NHS Trust<br/> Fraser, Hannah; University of Bristol, School of Social and Community Medicine<br/> Glass, Rachel; Public Health England, Immunisation, Hepatitis, Blood Safety and Countermeasures Response<br/> Graham, Lesley; ISD Scotland<br/> Gunson, Rory; Gartnavel General Hospital, West Of Scotland Specialist Virology Centre<br/> Hamilton, Emma; Scottish Drug Forum<br/> Harris, Helen; Public Health England, Immunisation, Hepatitis, Blood Safety and Countermeasures Response<br/> Harris, Magdalena; London School of Hygiene and Tropical Medicine, Centre for Research on Drugs and Health Behaviours<br/> Harris, Ross; Public Health England, Immunisation, Hepatitis, Blood Safety and Countermeasures Response<br/> Heinsbroek, Ellen; Public Health England Colindale</p> |

|                                 |                                                                                                                                                                                                                                                                                                                                                                                                                                                                                                                                                                                                                                                                                                                                                                                                                                                                                                                                                                                                                                                                                                                                                                                                                                                                                                                                                                                                                                                                                                                                                                                                                                                                                                                                                                                                                                                                                                                                                   |
|---------------------------------|---------------------------------------------------------------------------------------------------------------------------------------------------------------------------------------------------------------------------------------------------------------------------------------------------------------------------------------------------------------------------------------------------------------------------------------------------------------------------------------------------------------------------------------------------------------------------------------------------------------------------------------------------------------------------------------------------------------------------------------------------------------------------------------------------------------------------------------------------------------------------------------------------------------------------------------------------------------------------------------------------------------------------------------------------------------------------------------------------------------------------------------------------------------------------------------------------------------------------------------------------------------------------------------------------------------------------------------------------------------------------------------------------------------------------------------------------------------------------------------------------------------------------------------------------------------------------------------------------------------------------------------------------------------------------------------------------------------------------------------------------------------------------------------------------------------------------------------------------------------------------------------------------------------------------------------------------|
|                                 | <p>Hope, Vivian; Liverpool John Moores University<br/> Horwood, Jeremy; University of Bristol, UK, School of Social and Community Medicine<br/> Inglis, Sarah; University of Dundee, Division of Neuoscience; University of Dundee, Tayside Clinical Trials Unit<br/> Innes, Hamish; Glasgow Caledonian University, School of health and life sciences<br/> Lane, Athene; University of Bristol, School of Social and Community Medicine<br/> Meadows, Jade; University of Bristol School of Social and Community Medicine<br/> McAuley, Andrew; NHS Health Scotland<br/> Metcalf, Chris; University of Bristol, Social Medicine<br/> Migchelsen, Stephanie; Public Health England, Immunisation, Hepatitis, Blood Safety and Countermeasures Response<br/> Murray, Alex; Scottish Drug Forum<br/> Myring, Gareth; University of Bristol School of Social and Community Medicine<br/> Palmateer, Norah E.; Hlth Protect Scotland, Blood-borne viruses and sexually transmitted infections; Glasgow Caledonian University,<br/> Presanis, Anne; Institute of Public Health, MRC Biostatistics Unit<br/> Radley, Andrew; NHS Tayside, Directorate of Public Health; University of Dundee Division of Cardiovascular and Diabetes Medicine, Liver Group<br/> Ramsay, Mary; Public Health England, immunisation; London School of Hygiene and Tropical Medicine, Epidemiology<br/> Samartsidis, Pantelis; MRC Biostatistics Unit<br/> Simmons, Ruth; Public Health England,<br/> Sinka, Katy; Public Health England, Immunisation, Hepatitis, Blood Safety and Countermeasures Response<br/> Vojt, Gabriele; Glasgow Caledonian University<br/> Ward, Zoe; Bristol, Population Health Sciences, Bristol Medical School<br/> Whiteley, David; Edinburgh Napier University<br/> Yeung, Alan; Glasgow Caledonian University<br/> Hutchinson, Sharon; Health Protection Scotland, ; Glasgow Caledonian University, School of Health and Life Sciences</p> |
| <b>Primary Subject Heading</b>: | Public health                                                                                                                                                                                                                                                                                                                                                                                                                                                                                                                                                                                                                                                                                                                                                                                                                                                                                                                                                                                                                                                                                                                                                                                                                                                                                                                                                                                                                                                                                                                                                                                                                                                                                                                                                                                                                                                                                                                                     |
| Secondary Subject Heading:      | Addiction, Epidemiology, Gastroenterology and hepatology, Infectious diseases, Qualitative research                                                                                                                                                                                                                                                                                                                                                                                                                                                                                                                                                                                                                                                                                                                                                                                                                                                                                                                                                                                                                                                                                                                                                                                                                                                                                                                                                                                                                                                                                                                                                                                                                                                                                                                                                                                                                                               |
| Keywords:                       | Hepatology < INTERNAL MEDICINE, INFECTIOUS DISEASES, Epidemiology < INFECTIOUS DISEASES, PUBLIC HEALTH, Public health < INFECTIOUS DISEASES, Infection control < INFECTIOUS DISEASES                                                                                                                                                                                                                                                                                                                                                                                                                                                                                                                                                                                                                                                                                                                                                                                                                                                                                                                                                                                                                                                                                                                                                                                                                                                                                                                                                                                                                                                                                                                                                                                                                                                                                                                                                              |
|                                 |                                                                                                                                                                                                                                                                                                                                                                                                                                                                                                                                                                                                                                                                                                                                                                                                                                                                                                                                                                                                                                                                                                                                                                                                                                                                                                                                                                                                                                                                                                                                                                                                                                                                                                                                                                                                                                                                                                                                                   |

SCHOLARONE™  
Manuscripts

1  
2  
3  
4  
5  
6  
7  
8  
9  
10  
11  
12  
13  
14  
15  
16  
17  
18  
19  
20  
21  
22  
23  
24  
25  
26  
27  
28  
29  
30  
31  
32  
33  
34  
35  
36  
37  
38  
39  
40  
41  
42  
43  
44  
45  
46  
47  
48  
49  
50  
51  
52  
53  
54  
55  
56  
57  
58  
59  
60

ISRCTN72038467

**Evaluating the Population Impact of Hepatitis C Direct Acting Antiviral Treatment as Prevention for People Who Inject Drugs (EPIToPe) – a natural experiment (Protocol)**

**Authors:**

Hickman M<sup>1</sup>, Dillon J<sup>2</sup>, Elliott L<sup>3</sup>, De Angelis D<sup>4</sup>, Vickerman P<sup>1</sup>, Foster G<sup>5</sup>, Donnan PT<sup>2</sup>, Eriksen A<sup>6</sup>, Flowers P<sup>3</sup>, Goldberg D<sup>7</sup>, Hollingworth W<sup>1</sup>, Ijaz S<sup>8</sup>, Liddell D<sup>9</sup>, Mandal S<sup>8</sup>, Martin NK<sup>10,1</sup>, Beer L<sup>2</sup>, Drysdale K<sup>5</sup>, Fraser H<sup>1</sup>, Glass R<sup>8</sup>, Graham L<sup>11</sup>, Gunson R<sup>12</sup>, Hamilton E<sup>9</sup>, Harris H<sup>8</sup>, Harris M<sup>13</sup>, Harris R<sup>8</sup>, Heinsbroek E<sup>8</sup>, Hope V<sup>14</sup>, Horwood J<sup>1</sup>, Inglis S K<sup>2</sup>, Innes H<sup>3</sup>, Lane A<sup>1</sup>, Meadows, J<sup>1</sup>, McAuley A<sup>7</sup>, Metcalfe C<sup>1</sup>, Migchelsen S<sup>8</sup>, Murray, A<sup>9</sup>, Myring G<sup>1</sup>, Palmateer N<sup>3</sup>, Presanis A<sup>4</sup>, Radley A<sup>2</sup>, Ramsay M<sup>8</sup>, Samartsidis P<sup>4</sup>, Simmons R<sup>8</sup>, Sinka K<sup>8</sup>, Vojt, G<sup>3</sup>, Ward Z<sup>1</sup>, Whiteley D<sup>15</sup>, Yeung, A<sup>3</sup>, Hutchinson S<sup>3</sup>

Correspondence to: Prof Matthew Hickman; [Matthew.Hickman@bristol.ac.uk](mailto:Matthew.Hickman@bristol.ac.uk)

**Affiliations**

1 Population Health Sciences, Bristol Medical School, University of Bristol

2 University of Dundee

3 Glasgow Caledonian University

4 MRC Biostatistics Unit, University of Cambridge

5 Barts Liver Centre, Queen Mary University of London

6 Tayside Health Board

7 Health Protection Scotland

8 Public Health England

9 Scottish Drug Forum

10 Division of Infectious Diseases and Global Public Health, University of California San Diego

11 Information Services Division, Scotland

12 West of Scotland Specialist Virology Centre, Glasgow Royal Infirmary

13 London School of Hygiene and Tropical Medicine

14 Liverpool John Moores University

15 Edinburgh Napier University



ISRCTN72038467

## ABSTRACT

### Introduction:

Hepatitis C Virus (HCV) is the second largest contributor to liver disease in the UK, with injecting drug use as the main risk factor among the estimated 200,000 people currently infected. Despite effective prevention interventions, chronic HCV prevalence remains at 40% among people who inject drugs (PWID). New Direct Acting Antiviral (DAA) HCV therapies combine high cure rates (>90%) and short treatment duration (8-12 weeks). Theoretical mathematical modelling evidence suggests HCV treatment scale-up can prevent transmission and substantially reduce HCV prevalence/incidence among PWID. Our primary aim is to generate empirical evidence on the effectiveness of HCV “Treatment as Prevention” (TasP) in PWID.

### Methods and Analysis

We plan to establish a natural experiment with Tayside, Scotland, as a single intervention site where HCV care pathways are being expanded (including specialist drug treatment clinics, needle & syringe programmes (NSPs), pharmacies, and prison) and HCV treatment for PWID is being rapidly scaled-up. Other sites in Scotland and England will act as potential controls. Over two years from 2017/18, at least 500 PWID will be treated in Tayside, which simulation studies project will reduce chronic HCV prevalence among PWID by 62% (from 26% to 10%) and HCV incidence will fall by approximately 2/3 (from 4.2 per 100 person-years (p100py) to 1.4 p100py). Treatment response and re-infection rates will be monitored. We will conduct focus groups and interviews with service providers and patients that accept and decline treatment to identify barriers and facilitators in implementing TasP. We will conduct longitudinal interviews with up to 40 PWID to assess whether successful HCV treatment alters their perspectives on and engagement with drug treatment and recovery. Trained peer researchers will be involved in data collection and dissemination.

The primary outcome – chronic HCV prevalence in PWID – is measured using information from the Needle Exchange Surveillance Initiative (NESI) survey in Scotland and the Unlinked Anonymous Monitoring Programme (UAM) in England, conducted at least four times before and three times during and after the intervention. We will adapt Bayesian synthetic control methods (also called Causal Inference Models) to generate the cumulative impact of the intervention on chronic HCV prevalence and incidence. We will use a dynamic HCV transmission and economic model to evaluate the cost-effectiveness of the HCV TasP intervention, and to estimate the contribution of the scale up in HCV treatment to observed changes in HCV prevalence. Through the qualitative data we will systematically explore key mechanisms of TasP real world implementation from provider and patient perspectives to develop a manual for scaling up HCV treatment in other settings. We will compare qualitative accounts of drug treatment and recovery with a “virtual cohort” of PWID linking information on HCV treatment with Scottish Drug treatment databases to test whether DAA treatment improves drug treatment outcomes.

### Ethics and Dissemination

Extending HCV community care pathways is covered by ethics (ERADICATE C, ISRCTN27564683, Super DOT C Trial [clinicaltrials.gov:NCT02706223](http://clinicaltrials.gov/NCT02706223)). Ethical approval for extra data collection from patients including health utilities and qualitative interviews has been granted (INSERT) and ISRCTN registration has been completed (INSERT). Our findings will have direct NHS and patient relevance;

1  
2  
3  
4  
5  
6  
7  
8  
9  
10  
11  
12  
13  
14  
15  
16  
17  
18  
19  
20  
21  
22  
23  
24  
25  
26  
27  
28  
29  
30  
31  
32  
33  
34  
35  
36  
37  
38  
39  
40  
41  
42  
43  
44  
45  
46  
47  
48  
49  
50  
51  
52  
53  
54  
55  
56  
57  
58  
59  
60

ISRCTN72038467

informing prioritization given to early HCV treatment for PWID. We will present findings to practitioners and policy makers, and support design of an evaluation of HCV TasP in England.

### **Strengths and limitations of this study**

1. Our control sites in the rest of Scotland and England were not randomised so there will be confounding and uncertainty in the intervention effect estimates.
2. HCV treatment and prevention strategy in UK (and Europe) is evolving - motivated both by WHO "elimination targets" and falling drug prices – which may contaminate our controls.
3. However, our statistical models suggest that we should have sufficient power to detect an intervention effect and can model changes over time.
4. We will develop dynamic transmission and economic models that can estimate cost-effectiveness including the prevention benefit of this intervention.
5. We are conducting multiple nested qualitative studies and training and using peer researchers.

ISRCTN72038467

## Introduction and Background:

Infection with Hepatitis C Virus (HCV) is a progressive disease that over 20-40 years can lead to liver cancer and premature death. HCV is the second largest contributor to liver disease in the UK and one of the few causes that is curable<sup>1</sup>. In the UK it is estimated that approximately 200,000 people are infected with HCV, over 85% of whom are people who inject or have injected drugs (PWID)<sup>2-5</sup>. Chronic HCV prevalence and incidence among PWID remains high in UK at 20-50% and 5 to 15 per 100 person- years respectively<sup>4 6-18</sup>. Prevention of HCV transmission among PWID is critical to long-term prevention of HCV related liver disease<sup>19</sup>.

We have reviewed the effectiveness of traditional primary prevention against HCV –opioid substitution treatment (OST) and needle and syringe programmes (NSPs)<sup>12 20-22</sup>. Ongoing exposure to OST and high-coverage NSPs can reduce the risk of HCV transmission by 50-80%<sup>12 22</sup>. In Scotland HCV incidence among PWID decreased from approximately 14 to 6 per 100 person- years from 2008/09 to 2011/12 coinciding with the launch of the Scottish HCV strategy and action plan which incorporated scale-up of harm reduction interventions and HCV treatment<sup>10 23</sup>. We estimated that 60% of this decline could be attributed to the scale-up of OST and NSP during the action plan and that 1,400 HCV infections were averted by 2015<sup>24</sup>. However, there was no appreciable reduction in overall anti-HCV prevalence over this short period, and there is some suggestion that incidence has increased recently to ~10 per 100 person years (<http://www.hps.scot.nhs.uk/resourcedocument.aspx?id=5863>). HCV transmission models suggest that primary prevention through NSP and OST alone is insufficient to achieve substantial reductions (of the order of 40% or more within ten years) in HCV prevalence among PWID in the UK<sup>25 26</sup>.

Prevention of hepatitis C disease and HCV transmission is now possible because highly effective, tolerable, short-course interferon-free direct acting antiviral therapies (DAAs) are available for all HCV genotypes with cure rates – defined as sustained virological response (SVR)- exceeding 90%<sup>27-29</sup>. We, and others, hypothesise that HCV Treatment scale-up for PWID, and resulting HCV Treatment as Prevention (TasP) could enhance other primary interventions and reduce HCV incidence and chronic prevalence to negligible levels (i.e. towards elimination as a major public health concern)<sup>30-35</sup>. TasP refers to the concept whereby future transmission is reduced by treating affected individuals<sup>36 37</sup>: in HIV TasP Antiretroviral Treatment reduces transmission because individuals have undetectable infection<sup>38</sup>; in HCV TasP people are cured so reducing opportunities for future transmission. World Health Organization (WHO) targets for HCV elimination, adopted by UK and other countries, aim to reduce HCV incidence by 80% and associated mortality by 65% by 2030<sup>39 40 41 42 43 44</sup>.

Clinical guidelines in Europe and US changed from recommending prioritising HCV treatment to people with moderate to severe liver disease towards removing any restrictions and recommending that people at risk of transmission irrespective of fibrosis stage are offered treatment<sup>45-49</sup>. Cost-effectiveness models that incorporate the population prevention benefit suggest early treatment should be prioritised to PWID over other patient groups (unless chronic HCV prevalence and transmission is very high)<sup>50</sup>. There is direct evidence that SVR following HCV treatment reduces liver disease progression and mortality risk<sup>51-53</sup>, but in two recent reviews we found no empirical evidence that HCV treatment scale-up has reduced chronic HCV prevalence and incidence in PWID populations<sup>36 37</sup>. In part this is because in most settings HCV treatment rates in PWID are too low and any changes generally too small to be detected, as we show in two studies of seven sites in UK<sup>7</sup>

ISRCTN72038467

1  
2  
3 and an extension to 11 sites in Europe<sup>54</sup>. Until very recently in the UK, the annual number of HCV  
4 DAA treatments was restricted -as drug costs could be expensive (>£10,000 per patient). There is  
5 the opportunity now to test whether scaling up HCV treatment will reduce chronic HCV prevalence  
6 and transmission among PWID<sup>44</sup>.  
7  
8

9 In a pilot study (“Eradicate C”) in Tayside we showed that we can increase HCV case-finding and  
10 engage and successfully treat PWID in the community<sup>55</sup>. Combining further studies on extending  
11 community HCV treatment pathways in Tayside and additional treatments provided by NHS Tayside  
12 and Scottish Government we can establish an immediate natural experiment (with Tayside as the  
13 intervention site and other sites in Scotland and England as controls) to test and generate UK  
14 empirical evidence on the and potential impact and cost-effectiveness of HCV “Treatment as  
15 Prevention” (TasP) in people who inject drugs (PWID). The UK is one of few countries worldwide to  
16 have an established nationwide surveillance system monitoring HCV infection among PWID<sup>9 12 17 22 56-</sup>  
17 <sup>60</sup>. This is undertaken through a series of cross-sectional voluntary anonymous surveys of PWID  
18 recruited at harm reduction services, referred to as the Unlinked Anonymous Monitoring  
19 Programme (UAM) in England and Wales and the Needle Exchange Surveillance Initiative (NESI) in  
20 Scotland<sup>61 62</sup>. In addition, the UK has established sentinel laboratory surveillance of HCV testing and  
21 national monitoring of HCV treatment<sup>8 63-65</sup>. The data collected in both UAM and NESI will be used to  
22 assess out outcome.  
23  
24  
25  
26  
27  
28

29 Alongside a natural experiment in Tayside, we will collect information to assess the treatment  
30 facilitators and barriers. Historically it has proven very hard to engage PWID in HCV treatment<sup>66-69</sup>.  
31 Some barriers to engagement, such as poor efficacy or fear of interferon treatment side-effects, may  
32 be ameliorated by DAA therapy. However, other barriers such as mistrust of health services, stigma,  
33 and competing priorities faced by PWID may persist. In addition, providers may be reticent to refer  
34 or provide HCV treatment to PWID due to concerns about adherence, reinfection and perceptions of  
35 treatment ‘worth’<sup>70 71</sup>. It is expected that co-locating HCV treatment within existing services will  
36 reduce many system and provider level barriers to PWID accessing care<sup>66-68 72-77</sup>. However, this has  
37 not been tested in the context of community wide scale-up of interventions across multiple  
38 potential pathways. It is critical, therefore, that we understand how HCV TasP is embedded within  
39 the existing service landscape and incorporated into providers’ professional roles.  
40  
41  
42  
43  
44

45 Finally it has been hypothesised that successful HCV treatment in PWID may positively impact on  
46 understandings of self and identity and improve treatment of drug use disorders<sup>71 72 78-80</sup>. Accounts  
47 of ‘transformative’ outcomes extending beyond viral clearance alone include reference to reductions  
48 in drug and alcohol use, uptake of safer injecting practices, improved social relationships, enhanced  
49 sense of responsibility and self-worth. Hints of such collateral or indirect benefits are also found in  
50 quantitative studies reporting low re-infection rates and reductions in risky injecting behaviours  
51 among treated PWID<sup>81 82</sup>. We aim to test this hypothesis in our qualitative follow-up study and  
52 compare the findings to quantitative data generated from a virtual cohort.  
53  
54  
55  
56  
57  
58  
59  
60

ISRCTN72038467

## Methods and analysis:

### Study design

Our intention is to create and conduct a mixed methods study, including qualitative studies and economic evaluation, of a natural experiment of HCV Treatment as Prevention (TasP) among People who Inject Drugs (PWID). We also will develop methods for evaluating HCV TasP.

### Methods

#### Scaling-up HCV treatment

The **intervention** comprises the scale-up of HCV treatment in People Who Inject Drugs (PWID) which has started early in Tayside. . By combining support from Scottish Government, National Health Board Tayside (NHS Tayside) and industry (MSD, Gilead, BMS) we can deliver rapid intensive scale-up of HCV treatments for PWID (comprising an extra 400 HCV treatments, a 3.5-fold increase from treatments for PWID prior to April 2017, see sample size below). We have developed multiple integrated community HCV care pathways, including novel care pathways in pharmacies, a low threshold NSP, drug treatment services and prisons (see Figure 1). Our diagnostic pathways make extensive use of dried blood spot (DBS) testing for diagnosis of HCV antibody and chronic HCV with subsequent conventional laboratory testing in preparation for treatment (viral load, liver function and Fib4 fibrosis score)<sup>83-85</sup>.

#### *Study population*

Our intervention is delivered and measured at the population level – which we have created by combining several individual studies and treatment pathways as shown in Figure 1 (see ethics section below for the individual studies). We gained ethical approval East of Scotland Research Ethics Service REC 1 (ref: 18/ES/0128) to ask patients for permission to be recruited into the qualitative study (below) and extended clinical and behavioural drug history and data on health utilities (EQ5D-5L) at onset of treatment, during treatment and after the end of treatment.

Community HCV specialist nurses (3.5 FTE) coordinate and deliver case-finding and treatment across the pathways in Tayside (Figure 1).

*Figure 1: Overview of HCV testing and treatment pathways for the PWID population in NHS Tayside.*

The region of Tayside co-localises to NHS Tayside which is the provider of health care to a geographical area of 2,903 sq mi (7519 km<sup>2</sup>) including the cities of Dundee and Perth and the counties of Angus and Perth & Kinross, situated in the east of Scotland with a population of 416,000. It is a mixture of urban and rural environments with some of the most affluent and most deprived areas in Scotland. It is therefore a representative microcosm of many areas in the UK.

1  
2  
3  
4  
5  
6  
7  
8  
9  
10  
11  
12  
13  
14  
15  
16  
17  
18  
19  
20  
21  
22  
23  
24  
25  
26  
27  
28  
29  
30  
31  
32  
33  
34  
35  
36  
37  
38  
39  
40  
41  
42  
43  
44  
45  
46  
47  
48  
49  
50  
51  
52  
53  
54  
55  
56  
57  
58  
59  
60

ISRCTN72038467

### *HCV treatment*

Apart from expansion of community HCV care pathways, no new clinical procedures will be investigated and all PWID with chronic HCV will be offered oral DAA HCV treatment compliant with the Scottish clinical guidelines (<https://www.hps.scot.nhs.uk/resourcedocument.aspx?id=6621>).

As per local standard of care, participants will be offered appropriate harm reduction advice.

Standard care for patients is to test for SVR at 12 weeks after end of treatment with patients being recommended for annual follow-up if at risk of re-infection. Specialist nurses concentrate on building a good relationship with the participant to ensure that they do return for follow-up appointments. Health Protection Scotland collates national public health surveillance data on the number, characteristics and response of patients initiated onto HCV therapy, through Clinical Databases installed in 17 specialist HCV treatment centres, across Scotland<sup>41 86</sup>. A similar system also is available in England.

### *HCV surveillance and Intervention Outcome (Chronic HCV in PWID)*

The **outcome** is chronic HCV prevalence (HCV viraemia as measured by HCV PCR) among PWID in the community (not just in the patients who undergo HCV treatment). Prevalence will be monitored using the NESI and UAM surveys, as detailed below. During 2017-22, three waves of data collection for NESI (n=7,500) and five to six for UAM (n=17,000 in England) will measure this outcome.

In our pre-intervention period from 2010/11 to 2016 there have been four NESI surveys in Scotland (n=10,000 participants in total) and six UAM surveys in England (n=16,000 in total), which have involved the collection of DBS linked to questionnaire data. Participants are recruited at sentinel sites by a team of trained interviewers in Scotland (at over 100 NSP sites) and by agency staff in over 60 low-threshold drug agencies across England<sup>58 61</sup>. Participants complete a short questionnaire, with common questions across UAM and NESI, on demographics, injecting behaviour and service utilisation, and importantly (in relation to quantifying the intervention effect) both survey approaches have remained consistent over time.

The DBS samples collected in NESI and UAM have all been tested for HCV antibody, using the same methods (where sensitivity and specificity of the assay on DBS are close to 100%)<sup>83 84</sup>, and illustrate that antibody prevalence (ever infection) has remained relatively stable among PWID during this time (Figure 2). PCR positivity among antibody positive samples is used to determine chronic infection.

All NESI and UAM samples will be tested for HCV antibody and RNA PCR to assess the impact of HCV therapy scale-up – which is critical as trends in chronic infection and antibody status will diverge as more people are cured. In addition, we will undertake RNA PCR testing of all historical samples that were HCV antibody positive shown in Figure 2 so that we can measure chronic HCV prevalence among PWID pre-, as well as post-, intervention for analysis (below)

*Figure 2: Trends in HCV antibody prevalence among PWID in Scotland and England 2010/11-16*

Data on HCV PCR positivity among antibody negative samples identify recent infections and is used to estimate HCV incidence – which has fluctuated between 5-10 infections per 100 person years across the UK during the last five years<sup>61</sup>. We will also estimate HCV incidence from our transmission dynamic models<sup>24 54</sup>.

ISRCTN72038467

## Sample size, Power, and Estimating Intervention Effect

We updated estimates of the prevalence of PWID in Tayside<sup>5</sup> which suggest there are 2,760 (95% Credible Interval, CrI 2,360-3,170) PWID either currently injecting and/or in OST. NESI data suggest that approximately 30% have chronic HCV and over 75% of PWID with chronic HCV have been diagnosed. Prior to 2017 approximately 66 PWID were treated annually. From April 2017 we plan to treat at least 500 PWID in Tayside over 2 years (as a result of expanded community care pathways shown in Figure 1 and extra HCV treatments provided by NHS, Scottish Government and Industry funding). Adapting a transmission dynamic model that has been used in Tayside,<sup>87</sup> we hypothesize that within two years chronic HCV prevalence among PWID will reduce by approximately 62% from 26% (95% CrI 20-32) to at least 10% and chronic HCV incidence will fall by approximately 2/3s from 4.2 (95% CrI 2.4-7.1) per 100 person-years (p100py) to 1.4 (95%CrI 1.0 – 1.4) p100py (as shown in Figure 3). Modelling also suggests that maintaining these reductions after 2019 will require less than 40 treatments per year.

*Figure 3: Projected chronic HCV prevalence and incidence among PWID in Tayside with and without the intervention. Blue shaded area denotes the 95% credibility intervals of the model projections with and without the intervention*

We will adapt synthetic control methods or Causal Impact Model as proposed by Brodersen and colleagues<sup>88 89</sup>.

We have performed simulation studies to test power and evaluate the utility of the CIM assuming information on chronic HCV prevalence among PWID (shown in Figure 4). Provided trends in the chronic HCV prevalence in the pre-intervention period are relatively stable (which is the case) there will be sufficient power to detect the projected reduction in chronic prevalence. For example, in Figure 4d we see that for a prevalence reduction of 40% by year 2-3 the credible intervals of the estimated cumulative effect (cumulative drop in prevalence) exclude zero, correctly identifying evidence of a successful intervention. Whereas a cumulative reduction of <20% is unlikely to be detected.

*Figure 4: Causal Impact Synthetic Control Method (CIM) simulation and estimated intervention effects and 95% Credible Intervals for a range of assumed effects.*

*Footnote:- Illustration of CIM. First subplot shows a single dataset, where solid lines represent the simulated prevalence in the absence of the intervention, and the dashed lines represent the outcome of treated site in the post intervention period under different intervention magnitude scenarios. For each one of the three scenarios, we calculate the estimated average intervention effect along with credible intervals. These are shown in Subplots 2-4. We see that as the effect increases, the intervals tend to move away for zero. However, the intervention effect only becomes significant in scenario 3, where zero is not included in any of the post-intervention time points.*

ISRCTN72038467

## Qualitative Studies

### Understanding the barriers and facilitators to scaling-up community-based HCV treatment

The qualitative study design has two distinct arms focusing on the intervention providers, and the intervention recipients.

#### *Intervention providers*

A purposive sample of 30 intervention providers, comprising nursing leads and key individuals from collaborating organisations will be approached directly by the lead hepatitis nurse. Seven focus groups will be convened according to professional role and locality:

- HCV healthcare specialists (nurses and physicians)
- Community pharmacists
- Prison staff (both healthcare and security)
- 'Drug workers' (from OST and NSP services)

Each focus group will consist of a maximum of six individuals and ideally comprise multi-agency mixed groups. Individual interviews by telephone will be offered for those hesitant to join a group (estimate 10 interviews). Topic guides informed by previous work in this area<sup>66 68 76 90</sup> will facilitate group discussion.

#### *Intervention recipients – cross-sectional and longitudinal*

The intervention recipient arm of the study will comprise both cross-sectional and longitudinal elements. A cross-sectional approach will be employed to recruit 6-10 participants who do not take up the offer of treatment. These individuals will be recruited through the treatment pathways or through our peer researcher networks. The longitudinal element will follow a cohort of up to 40 individuals recruited following their course of HCV treatment. These individuals will be purposively sampled from the existing services in which HCV TasP has been embedded (i.e. pharmacy, prison and drug service), and then followed-up at one year post-treatment (with 70% expected to be followed-up)<sup>91</sup>. We aim to recruit women as well as men, younger and older people; those treated previously and first time; those injecting and not injecting at treatment onset. Follow-up interviews will explore collateral effects of HCV TasP including outcomes pertaining to drug use and injecting practices (secondary outcome below).

Participants will be recruited by hepatitis nurses or other clinical staff in Tayside and the face-to-face semi-structured interview will be conducted by peer-researchers, trained and guided by experienced qualitative researchers. Dr Magdalena Harris explains the importance of the use of peer researchers within the context of EPIToPe: <https://www.youtube.com/watch?v=9ZZo3fKOXlg>

<sup>92 93</sup>. The Scottish Drugs Forum (SDF) works with a group of Tayside peer-researchers with lived experience of injecting. Peer-researchers will receive study-orientated training and be provided with ongoing support to co-produce data and contribute to study outputs. A £20 shopping voucher will be offered to all interviewees except those in prison (Scottish prison service ethics did not permit thank you vouchers to prison participants).



ISRCTN72038467

### Qualitative Data Analysis

Interviews and focus-groups will be audio-recorded using encrypted digital voice recorders, transcribed verbatim and anonymised. *Nvivo* v.10 software will be used to code and manage qualitative data. First level analysis will be deductive, guided by the research questions, and peer researchers will be consulted for input and feedback during the analytical process<sup>94</sup>. A constant comparison method will be used to develop the thematic analysis and will reflect diverging and converging narratives, for example, across groups of intervention recipients at different time points in the treatment pathway, or between groups of intervention providers<sup>94</sup>. The findings will be contextualised in the relevant theoretical perspectives which may include the diffusion of preventive innovations (staff) or social norms and values that might underpin health behaviour (recipients)<sup>95 96</sup>. We will assess TasP both from the providers' perspective and from patients' perspective including those who refuse treatment.

We will use the findings iteratively to update the HCV TasP logic model shown in Figure 5. Our qualitative data will be used to generate a manual of an optimal intervention for other sites in UK. In previous examples, such as [<https://www.youtube.com/channel/UCBV8smLmkQQVT9D0OR-md1g/videos>] we have used the Behaviour Change Wheel<sup>96</sup> as the framework to retrospectively analyse the success and failure of implementation within Tayside and then prospectively to formulate the optimal implementation intervention.

*Figure 5: Preliminary Logic Model HCV Treatment as Prevention (EPIToPe)*

## Mixed Method Study on drug use outcomes: OST retention, drug overdose, recovery, and social transformation

Health Protection Scotland (HPS) link data on diagnostic HCV tests in the four largest Scottish NHS boards (including Tayside)<sup>8</sup> and all persons undergoing HCV treatment in the Scottish HCV Clinical database<sup>97</sup> which are also linked with other databases (including deaths, hospitalisations and drug treatment)<sup>8 42 98-100</sup> and from 2018 Scotland's Prescribing Information System (PIS) which holds data on OST and NHS prison health database (Prison Vision)<sup>101-105</sup>. PWID attending drug services who were HCV diagnosed, compared to those who were not, are at increased risk of drug-related and other cause-specific morbidity/mortality<sup>106 107</sup>. Thus, we will create a virtual cohort of chronic HCV infected PWID (estimated to involve at least 600 individuals from Tayside and 3,000 from elsewhere) and through linkage identify those who have been treated and attained SVR with those who have not. We will assess and compare the following outcomes:- retention in drug treatment (determined through linkage to drug treatment and prescribing databases), drug- and alcohol- related morbidity/mortality (through linkage to all hospital admission and mortality databases), and other markers of relapse (through linkage to prisons database).

ISRCTN72038467

## Economic and impact evaluation

Infectious disease models can test the extent to which observed changes in disease transmission can be attributed to specific interventions,<sup>108-112</sup> and assess cost-effectiveness of interventions that avert secondary infections, i.e. have a population prevention benefit<sup>50 85 113-117</sup>. We will update and adapt a transmission model of HCV among PWID in Scotland and Tayside to model the impact of the HCV treatment intervention based on historical trends and new observations collected as part of this programme<sup>39 87</sup>. We will stratify the PWID population into current (injected in the previous year) and temporarily ceased (in OST and not injected in the previous year); as well as by duration of injecting (< 3 years, 3 to 9 years, 10+ years since onset), prevention intervention exposure (OST and/or high coverage NSP), and intervention settings for testing and treatment. We will use Approximate Bayesian Computation to calibrate the model to pre-intervention trends in chronic HCV prevalence and incidence among PWID in Tayside. The model will simulate the impact of observed rates of HCV treatment and cure rates for the intervention period, also incorporating any changes in the coverage of OST and NSP and injecting risk behaviours.

We will test consistency between the model impact projections and observed changes in HCV chronic prevalence and incidence from Tayside to disentangle the impact of HCV TasP from other interventions (OST/NSP) or epidemiological changes, and predict the impact of the TasP on number of HCV infections averted. If they are not consistent then alternative evidence-based hypotheses will be tested for why the model projects a different impact and the best fitting models will then be used to project the impact of the intervention. This will be assessed compared to two alternative counterfactuals where treatment rates are either at pre-scale-up levels in Tayside or at the average level achieved in other UK sites over the scale-up period. The impact of any changes in OST and NSP coverage will also be assessed to determine the contribution of those changes on observed effects. Impact will be assessed in terms of the relative decrease in prevalence and incidence, as well as the number and percent of infections averted in the intervention model projections compared to each counterfactual over different time frames. These model projections can also be taken forward to evaluate the possible impact of the intervention over next 5 or 10 years.

We will evaluate the cost-effectiveness of the intervention (HCV treatment scale-up) compared to status quo (expected rate of HCV case-finding and treatment among PWID in the rest of the UK) from a health care provider (NHS) perspective, with the cost-effectiveness of the different settings where case-finding occurs also being assessed. The cost-effectiveness (CE) model will be based on the same dynamic impact model, adapted to include HCV disease progression stages and tracking of health outcomes among PWID after cessation of injecting<sup>50</sup>. The economic evaluation will incorporate both individual benefits of HCV treatment (on disease progression) as well as population benefits (on HCV transmission). We will calculate the total number of infections and deaths over a 50-year time horizon for the intervention and counterfactual scenario and estimate the costs and quality-adjusted life years (QALYs) based on the number of individuals in each disease stage per year in the model. We will discount all future costs and QALYs at 3.5% (NICE guidelines <https://www.nice.org.uk/process/pmg9/resources/guide-to-the-methods-of-technology-appraisal-2013-pdf-2007975843781>). Probabilistic sensitivity analyses will be used to estimate the parametric uncertainty in the impact and cost projections. Cost-effectiveness results will be expressed in terms of incremental cost-effectiveness ratios (ICERs) and net monetary benefits (NMB) estimated using

ISRCTN72038467

1  
2  
3 NICE thresholds (£20,000 and £30,000 per QALY). We will plot cost-effectiveness acceptability  
4 curves to determine the probability of the intervention being cost-effective compared to different  
5 willingness-to-pay thresholds. Analyses of covariance (ANCOVA) methods will be used to summarize  
6 the proportion of the variability in the incremental costs and QALYs explained by uncertainty in  
7 different input parameters. Univariate sensitivity analyses will consider the effect of changes in  
8 important parameters such as time horizon, treatment cost and discount rate.  
9  
10

11  
12  
13 We focus on the incremental or additional resource costs associated with the intervention in  
14 Tayside. These costs, in part based on our earlier work for other studies, will include such things as  
15 the nurse time spent on intervention related activities (training other staff to offer HCV testing and  
16 treatment referral) as well as additional HCV testing and treatment costs, any additional OST costs  
17 due to HCV testing or treatment, and other staff time at the NSP, drug treatment centres and  
18 prisons involved with the intervention. Most of the incremental costs can be defined as variable  
19 (driven by extra nurse time and HCV testing/treatment costs). NHS HCV care costs and health  
20 utilities will be attached to each disease stage, based primarily on previous syntheses and models,  
21 which assume that PWID have a lower QoL than non-PWID of a similar age, gender and liver disease  
22 stage<sup>118-120</sup>. Additional data using the EQ-5D-5L tool during this study will generate new health utility  
23 data on the QoL amongst PWID before and after DAA treatment.  
24  
25  
26  
27  
28

## 29 Patient and Public Involvement

30  
31 Patient and Public Involvement (PPI) was led by the Hepatitis C Trust and supported by qualitative  
32 research assessing barriers and facilitators to HCV treatment access (led by Magdalena Harris). The  
33 Scottish Drug Forum (SDF) were also actively involved in the development of EPIToPe. The input  
34 from PPI groups has influenced the design of care pathways and has ensured that peer research is an  
35 essential element of the qualitative strand of EPIToPe.  
36  
37  
38  
39

40 A pilot NIHR funded study in England (HEPCAT) responding to NICE Guidance on Hepatitis Case  
41 Finding was co-designed with Hepatitis C trust. It showed that Hepatitis C Facilitators and peer  
42 support networks can increase the uptake of HCV case-finding and HCV treatment readiness in  
43 addiction services. This pilot study and our studies in Dundee/Tayside will influence how HCV  
44 treatment can be scaled up in England and our proposed evaluation HCV treatment as prevention.  
45  
46  
47  
48

49 Peer researchers will be trained to conduct the longitudinal study with PWID treated for HCV and  
50 will be involved and contribute to the analysis of the findings. Peer researchers and SDF will be  
51 members of the project management group and steering committee.  
52  
53  
54

55 Dissemination events will be held in Dundee to discuss and present the findings from the qualitative  
56 studies with patient groups and services. These will be facilitated by SDF to support active  
57 contribution from our peer researchers. The study findings will be summarised and promoted  
58 through SDF website, social media platforms and through their sector-wide conferences in Scotland.  
59 Hepatitis Scotland, who are hosted within SDF, together with patient and public groups in England  
60

1  
2  
3  
4  
5  
6  
7  
8  
9  
10  
11  
12  
13  
14  
15  
16  
17  
18  
19  
20  
21  
22  
23  
24  
25  
26  
27  
28  
29  
30  
31  
32  
33  
34  
35  
36  
37  
38  
39  
40  
41  
42  
43  
44  
45  
46  
47  
48  
49  
50  
51  
52  
53  
54  
55  
56  
57  
58  
59  
60

ISRCTN72038467

will take an active role in the wider national and international dissemination of the research, it's translation into patient meaningful materials and its integration into a national policy context. The research will also be promoted via Hepatitis C Trust and Public Health England.

## Discussion

### Strengths and limitations of this study

Several limitations arise from the “natural experiment” design as our intervention and controls were not randomised. In the UK and many other countries there is no longer sufficient equipoise in clinicians and policymakers – given WHO and national strategies on HCV “elimination” - to mount an RCT of HCV Treatment as Prevention. As a result, there will be confounding and additional uncertainty in the measurement of the intervention effect. However, we consider that a natural experiment and use of synthetic control methods to be a more robust design than simple before and after studies. Our preliminary simulation work also suggests that we should have sufficient power to detect the large intervention effect that is planned.

We know also that HCV treatment and prevention strategy in UK (and Europe) is evolving - motivated both by WHO “elimination targets” and falling drug prices – and our control sites in Scotland and England may increase HCV treatment rates earlier than expected. This will complicate the analyses a little and potentially dilute the intervention effect. We are confident that we can adapt the synthetic control methods to take account of changes over time – and that because Tayside has started so early in scaling up HCV treatment that we will have time to detect a difference in the outcome.

The lack of randomised controls means that we have to generate the counterfactual of “no HCV treatment scale-up” through our HCV transmission model so that we can subsequently estimate cost-effectiveness of the intervention in Tayside. This is not ideal but has become standard practice in economic models of novel HCV treatment interventions – and we are involved with the modelling of HCV treatment pathways through homeless centres, prison, A&E, pharmacies, specialist drug clinics, and NSPs (P Vickerman personal communication and e.g. <sup>55 85 121</sup>). We know also, however, that the benefit in terms of additional Quality of Life Years and averted HCV infections accrues and occurs over a prolonged period <sup>50</sup>. It is more critical for any economic evaluation of HCV interventions in PWID that a dynamic model is used so that the prevention benefit (in terms of HCV infections averted) is correctly accounted for.

We are using peer researchers in the qualitative arm of patients’ perspectives on the intervention and on the impact of HCV treatment on addiction outcomes. This is novel but adds additional challenges to obtaining NHS passports and ensuring data quality across the interviews and interviewees. We are also intending to support peers in analysis and interpretation of the findings which we believe has not been done before. We have trained the interviewers and will be monitoring their performance of the interviewers to ensure consistent study quality – and will replace peers with our qualitative researcher if required.

### Future Study: Natural experiment of TasP in England

ISRCTN72038467

In England HCV treatment is delivered through 22 operational delivery networks (ODNs). NHS England's HCV strategy (2016-2019) prioritised 10,000 patients per year in line with the declared priorities of the network which could (and in many cases did) include people who use drugs at risk of transmission<sup>44</sup>. In October 2018 it is anticipated that a new procurement deal will substantially increase the number of patients who can access DAAs and this will enable 'trace and treat' options to be introduced. We will use the first part of EPIToPe including the manual generated by the qualitative study, enhancements to historical and ongoing surveillance of chronic HCV in PWID, infectious disease models, and methodological developments of causal impact model, to co-design with ODN leads a natural experiment of HCV TasP in England.

### Authors' contributions:

All authors contributed to editing of the manuscript.

M Hickman (MH) and S Hutchinson (SH) are co-PIs of EPIToPe and prepared first draft of the manuscript.

J Dillon (JD) leads intervention scale-up in Tayside in collaboration with Tayside CTU (L Beer (LB), PT Donnan (PTD), S Inglis (SI), Andrew Radley (AR) and A Eriksen (AE)).

L Elliot (LE) leads qualitative component of EPIToPe in collaboration with Scottish Drug Forum (D Liddell (DL), E Hamilton (EH) and A Murray (AM)) and support from M Harris (MHa), G Vojt (GV) and D Whitely (DW) on qualitative research and training of peer support workers, and P Flowers (PF) on behavioural science.

D De Angelis (DA) leads synthetic control estimation and multiple parameter evidence synthesis in collaboration with P Samartsidis (PS), R Harris (RA), A Presanis (AP), and N Martin (NM).

P Vickerman (PV) leads dynamic impact and economic modelling in collaboration with NM, Z Ward (ZW), H Fraser (HF) with health economics led by W Hollingworth (WH), with G Myring (GM), as part of Bristol Randomised Trial Collaboration (BRTC) with advice on trial design from J Horwood (JH), C Metcalfe (CM) and A Lane (AL).

G Foster (GF) is leading design of evaluation in England based on EPIToPe with support from BRTC and K Drysdale

SH is leading on outcome measurement in Scotland with Health Protection Scotland (D Goldberg (DG), A McAuley (AMc)), and in collaboration with L Graham (LG) from ISD, R Gunson (RG), H Innes (HI), N Palmateer (NP) and A Yeung (AY).

S Mandal (SM) and S Ijaz (SI) are leading on outcome measurement in England with R Glass (RG), H Harris (HH), E Heinsbroek (EH), V Hope (VH), S Migchelsen (SM), M Ramsay (MR), R Simmons (RS), K Sinka (SK).

J Meadows (JM) is the Programme Manager.

**Funding statement:** 'This paper presents independent research funded by the National Institute for Health Research (NIHR) under its Programme Grants for Applied Research Programme (Reference Number RP-PG-0616-20008). The views expressed are those of the author(s) and not necessarily those of the NHS, the NIHR or the Department of Health.'

ISRCTN72038467

In addition, we acknowledge support from NIHR Health Protection Research Unit in Evaluation, and the Bristol Randomised Trials Collaboration (BRTC), a UKCRC Registered Clinical Trials Unit in receipt of NIHR Clinical Trials Units (CTU) support funding. The views expressed are those of the author and not necessarily those of the NHS, the NIHR or the Department of Health and Social Care. NM is supported by the National Institute for Drug Abuse [grant number R01 DA037773] and the University of California San Diego Center for AIDS Research (CFAR), a National Institute of Health (NIH) funded program [grant number P30 AI036214].

We would like to thank all those involved in PPI from both SDF and the Hepatitis C Trust.

**Competing interests statement.**

MH has received unrestricted honoraria for presenting at meetings from Abbvie, Gilead, MSD. NM has received unrestricted research grants and honoraria from Gilead and Merck. PV has received unrestricted honoraria for presenting at meetings from Abbvie and Gilead. PV has received unrestricted research grants from Gilead.

**PTD has received unrestricted grants from Shire pharmaceuticals, Novo Nordisk and Gilead and is a member of the Scottish Medicines Consortium. HF has received an honorarium from MSD.**

ISRCTN72038467

## References

1. Williams R, Aspinall R, Bellis M, et al. Addressing liver disease in the UK: a blueprint for attaining excellence in health care and reducing premature mortality from lifestyle issues of excess consumption of alcohol, obesity, and viral hepatitis. *Lancet* 2014;384(9958):1953-97. doi: 10.1016/S0140-6736(14)61838-9
2. De Angelis D, Sweeting M, Ades A, et al. An evidence synthesis approach to estimating Hepatitis C prevalence in England and Wales. *Stat Methods Med Res* 2009;18(4):361-79. doi: 0962280208094691 [pii];10.1177/0962280208094691 [doi]
3. Harris RJ, Ramsay M, Hope VD, et al. Hepatitis C prevalence in England remains low and varies by ethnicity: an updated evidence synthesis. *Eur J Public Health* 2012;22(2):187-92. doi: ckr083 [pii];10.1093/eurpub/ckr083 [doi]
4. Hutchinson SJ, Roy KM, Wadd S, et al. Hepatitis C virus infection in Scotland: epidemiological review and public health challenges. *Scott Med J* 2006;51(2):8-15.
5. Prevost TC, Presanis AM, Taylor A, et al. Estimating the number of people with hepatitis C virus who have ever injected drugs and have yet to be diagnosed: an evidence synthesis approach for Scotland. *Addiction* 2015;110(8):1287-300. doi: 10.1111/add.12948
6. Hutchinson SJ, McIntyre PG, Molyneaux P, et al. Prevalence of hepatitis C among injectors in Scotland 1989-2000: declining trends among young injectors halt in the late 1990s. *Epidemiol Infect* 2002;128(3):473-77.
7. Martin NK, Foster GR, Vilar J, et al. HCV treatment rates and sustained viral response among people who inject drugs in seven UK sites: real world results and modelling of treatment impact. *J Viral Hepat* 2015;22(4):399. doi: 10.1111/jvh.12338
8. McLeod A, Weir A, Aitken C, et al. Rise in testing and diagnosis associated with Scotland's Action Plan on Hepatitis C and introduction of dried blood spot testing. *J Epidemiol Community Health* 2014;68(12):1182-8. doi: 10.1136/jech-2014-204451
9. Palmateer NE, Hutchinson SJ, Innes H, et al. Review and meta-analysis of the association between self-reported sharing of needles/syringes and hepatitis C virus prevalence and incidence among people who inject drugs in Europe. *Int J Drug Policy* 2013;24(2):85-100. doi: S0955-3959(12)00123-5 [pii];10.1016/j.drugpo.2012.08.006 [doi]
10. Palmateer NE, Taylor A, Goldberg DJ, et al. Rapid decline in HCV incidence among people who inject drugs associated with national scale-up in coverage of a combination of harm reduction interventions. *PLoS One* 2014;9(8):e104515. doi: 10.1371/journal.pone.0104515
11. Roy KM, Hutchinson SJ, Wadd S, et al. Hepatitis C virus infection among injecting drug users in Scotland: a review of prevalence and incidence data and the methods used to generate them. *Epidemiol Infect* 2007;135(3):433-42.
12. Turner KM, Hutchinson S, Vickerman P, et al. The impact of needle and syringe provision and opiate substitution therapy on the incidence of hepatitis C virus in injecting drug users: pooling of UK evidence. *Addiction* 2011;106(11):1978-88. doi: 10.1111/j.1360-0443.2011.03515.x [doi]
13. Harris RJ, Hope VD, Morongiu A, et al. Spatial mapping of hepatitis C prevalence in recent injecting drug users in contact with services. *Epidemiol Infect* 2011:1-10. doi: S0950268811001634 [pii];10.1017/S0950268811001634 [doi]
14. Hickman M, Hope V, Brady T, et al. Hepatitis C virus (HCV) prevalence, and injecting risk behaviour in multiple sites in England in 2004. *J Viral Hepat* 2007;14(9):645-52.
15. Hope VD, Hickman M, Ngui SL, et al. Measuring the incidence, prevalence and genetic relatedness of hepatitis C infections among a community recruited sample of injecting drug users, using dried blood spots. *J Viral Hepat* 2011;18:262-70. doi: JVH1297 [pii];10.1111/j.1365-2893.2010.01297.x [doi]

ISRCTN72038467

16. Sutton AJ, Gay NJ, Edmunds WJ, et al. Modelling the force of infection for hepatitis B and hepatitis C in injecting drug users in England and Wales. *BMC Infect Dis* 2006;6:93. doi: 1471-2334-6-93 [pii];10.1186/1471-2334-6-93 [doi]
17. Sweeting MJ, Hope VD, Hickman M, et al. Hepatitis C infection among injecting drug users in England and Wales (1992-2006): there and back again? *Am J Epidemiol* 2009;170(3):352-60. doi: kwp141 [pii];10.1093/aje/kwp141 [doi]
18. Wiessing L, Ferri M, Grady B, et al. Hepatitis C virus infection epidemiology among people who inject drugs in Europe: a systematic review of data for scaling up treatment and prevention. *PLoS One* 2014;9(7):e103345. doi: 10.1371/journal.pone.0103345
19. Hickman MM, N., editor. *Hepatitis C among drug users in Europe: epidemiology, treatment and prevention*. Lisbon: EMCDDA, 2016.
20. Van Den Berg C, Smit C, Van BG, et al. Full participation in harm reduction programmes is associated with decreased risk for human immunodeficiency virus and hepatitis C virus: evidence from the Amsterdam Cohort Studies among drug users. *Addiction* 2007;102(9):1454-62. doi: ADD1912 [pii];10.1111/j.1360-0443.2007.01912.x [doi]
21. Hagan H, Pouget ER, Des Jarlais DC. A systematic review and meta-analysis of interventions to prevent hepatitis C virus infection in people who inject drugs. *J Infect Dis* 2011;204(1):74-83. doi: jir196 [pii];10.1093/infdis/jir196 [doi]
22. Platt L, Reed J, Minozzi S, et al. Effectiveness of needle/syringe programmes and opiate substitution therapy in preventing HCV transmission among people who inject drugs. *Cochrane Database Syst Rev* 2016;2016(1) doi: 10.1002/14651858.CD012021
23. Hutchinson SJ, Dillon JF, Fox R, et al. Expansion of HCV treatment access to people who have injected drugs through effective translation of research into public health policy: Scotland's experience. *Int J Drug Policy* 2015 doi: 10.1016/j.drugpo.2015.05.019
24. Fraser H, Mukandavire C, Martin NK, et al. Modelling the impact of a national scale-up of interventions on hepatitis C virus transmission among people who inject drugs in Scotland. *Addiction* 2018 doi: 10.1111/add.14267 [published Online First: 2018/05/22]
25. de Vos AS, van der Helm JJ, Matser A, et al. Decline in incidence of HIV and hepatitis C virus infection among injecting drug users in Amsterdam; evidence for harm reduction? *Addiction* 2013;108(6):1070-81. doi: 10.1111/add.12125
26. Vickerman P, Martin N, Turner K, et al. Can needle and syringe programmes and opiate substitution therapy achieve substantial reductions in hepatitis C virus prevalence? Model projections for different epidemic settings. *Addiction* 2012;107(11):1984-95. doi: 10.1111/j.1360-0443.2012.03932.x [doi]
27. Dore GJ, Feld JJ. Hepatitis C virus therapeutic development: in pursuit of "perfectovir". *Clin Infect Dis* 2015;60(12):1829-36. doi: 10.1093/cid/civ197
28. Gogela NA, Lin MV, Wisocky JL, et al. Enhancing our understanding of current therapies for hepatitis C virus (HCV). *Curr HIV/AIDS Rep* 2015;12(1):68-78. doi: 10.1007/s11904-014-0243-7
29. Walker DR, Pedrosa MC, Manthena SR, et al. Early View of the Effectiveness of New Direct-Acting Antiviral (DAA) Regimens in Patients with Hepatitis C Virus (HCV). *Adv Ther* 2015;32(11):1117-27. doi: 10.1007/s12325-015-0258-5
30. Hellard M, Doyle JS, Sacks-Davis R, et al. Eradication of hepatitis C infection: The importance of targeting people who inject drugs. *Hepatology* 2014;59(2):366-69. doi: 10.1002/hep.26623
31. Hagan LM, Wolpe PR, Schinazi RF. Treatment as prevention and cure towards global eradication of hepatitis C virus. *Trends in Microbiology* 2013;21(12):625-33. doi: <http://dx.doi.org/10.1016/j.tim.2013.09.008>
32. Grebely J, Matthews GV, Lloyd AR, et al. Elimination of hepatitis C virus infection among people who inject drugs through treatment as prevention: feasibility and future requirements. *Clin Infect Dis* 2013;57(7):1014-20. doi: 10.1093/cid/cit377



ISRCTN72038467

- 1
- 2
- 3
- 4 33. Bruggmann P. Treatment as prevention: The breaking of taboos is required in the fight against
- 5 hepatitis C among people who inject drugs. *Hepatology* 2013;58(5):1523-25. doi:
- 6 10.1002/hep.26539
- 7 34. Martin NK, Vickerman P, Grebely J, et al. HCV treatment for prevention among people who inject
- 8 drugs: Modeling treatment scale-up in the age of direct-acting antivirals. *Hepatology* 2013
- 9 doi: 10.1002/hep.26431 [doi]
- 10 35. Wedemeyer H, Duberg AS, Buti M, et al. Strategies to manage hepatitis C virus (HCV) disease
- 11 burden. *J Viral Hepat* 2014;21 Suppl 1:60-89. doi: 10.1111/jvh.12249
- 12 36. Martin NK, Vickerman P, Dore GJ, et al. The hepatitis C virus epidemics in key populations
- 13 (including people who inject drugs, prisoners and MSM): the use of direct-acting antivirals as
- 14 treatment for prevention. *Current opinion in HIV and AIDS* 2015;10(5):374-80. doi:
- 15 10.1097/COH.000000000000179
- 16 37. Hickman M, De Angelis D, Vickerman P, et al. HCV Treatment as Prevention in People Who Inject
- 17 Drugs—testing the evidence. *Current opinion in infectious diseases* 2015;28(6):576.
- 18 38. Hayes R, Ayles H, Beyers N, et al. HPTN 071 (PopART): rationale and design of a cluster-
- 19 randomised trial of the population impact of an HIV combination prevention intervention
- 20 including universal testing and treatment - a study protocol for a cluster randomised trial.
- 21 *Trials* 2014;15:57. doi: 10.1186/1745-6215-15-57
- 22 39. Fraser H, Zibbell J, Hoerger T, et al. Scaling-up HCV prevention and treatment interventions in
- 23 rural United States—model projections for tackling an increasing epidemic. *Addiction*
- 24 2018;113(1):173-82. doi: 10.1111/add.13948 [published Online First: 2017/07/25]
- 25 40. Organization WH. Global Health Sector Strategy on Viral Hepatitis 2016-2021: Towards ending
- 26 viral hepatitis. In: Organization WH, ed. Geneva: WHO, 2016.
- 27 41. Innes HA, McDonald SA, Dillon JF, et al. Toward a more complete understanding of the
- 28 association between a hepatitis C sustained viral response and cause-specific outcomes.
- 29 *Hepatology* 2015;62(2):355-64. doi: 10.1002/hep.27766
- 30 42. Innes HA, Hutchinson SJ, Allen S, et al. Excess liver-related morbidity of chronic hepatitis C
- 31 patients, who achieve a sustained viral response, and are discharged from care. *Hepatology*
- 32 2011;54(5):1547-58. doi: 10.1002/hep.24561
- 33 43. Innes H, Goldberg D, Dillon J, et al. Strategies for the treatment of Hepatitis C in an era of
- 34 interferon-free therapies: what public health outcomes do we value most? *Gut* 2014 doi:
- 35 10.1136/gutjnl-2014-308166
- 36 44. Harris RJ, Martin NK, Rand E, et al. New treatments for hepatitis C virus (HCV): scope for
- 37 preventing liver disease and HCV transmission in England. *J Viral Hepat* 2016 doi:
- 38 10.1111/jvh.12529
- 39 45. European Association for the Study of the L. EASL recommendations on treatment of hepatitis C
- 40 2014. *J Hepatol* 2014;61(2):373-95. doi: 10.1016/j.jhep.2014.05.001
- 41 46. European Association for the Study of the Liver. Electronic address eee. EASL Recommendations
- 42 on Treatment of Hepatitis C 2015. *J Hepatol* 2015;63(1):199-236. doi:
- 43 10.1016/j.jhep.2015.03.025
- 44 47. Panel AIHG. Hepatitis C guidance: AASLD-IDSAs recommendations for testing, managing, and
- 45 treating adults infected with hepatitis C virus. *Hepatology* 2015 doi: 10.1002/hep.27950
- 46 48. Grebely J, Robaey G, Bruggmann P, et al. Recommendations for the management of hepatitis C
- 47 virus infection among people who inject drugs. *Int J Drug Policy* 2015;26(10):1028-38. doi:
- 48 10.1016/j.drugpo.2015.07.005
- 49 49. European Association for the Study of the Liver. Electronic address eee. EASL Recommendations
- 50 on Treatment of Hepatitis C 2016. *J Hepatol* 2016 doi: 10.1016/j.jhep.2016.09.001
- 51 50. Martin NK, Vickerman P, Dore GJ, et al. Prioritization of HCV treatment in the direct-acting
- 52 antiviral era: An economic evaluation. *J Hepatol* 2016;65(1):17-25. doi:
- 53 10.1016/j.jhep.2016.02.007
- 54
- 55
- 56
- 57
- 58
- 59
- 60

ISRCTN72038467

- 1
- 2
- 3
- 4 51. Aleman S, Rahbin N, Weiland O, et al. A risk for hepatocellular carcinoma persists long-term after
- 5 sustained virologic response in patients with hepatitis C-associated liver cirrhosis. *Clin Infect*
- 6 *Dis* 2013;57(2):230-6. doi: 10.1093/cid/cit234
- 7 52. van der Meer AJ, Veldt BJ, Feld JJ, et al. Association between sustained virological response and
- 8 all-cause mortality among patients with chronic hepatitis C and advanced hepatic fibrosis.
- 9 *JAMA* 2012;308(24):2584-93. doi: 10.1001/jama.2012.144878
- 10 53. Innes H, Hutchinson SJ, Obel N, et al. Liver mortality attributable to chronic hepatitis C virus
- 11 infection in Denmark and Scotland--using spontaneous resolvers as the benchmark
- 12 comparator. *Hepatology* 2016;63(5):1506-16. doi: 10.1002/hep.28458
- 13 54. Fraser H, Martin NK, Brummer-Korvenkontio H, et al. Model projections on the impact of HCV
- 14 treatment in the prevention of HCV transmission among people who inject drugs in Europe. *J*
- 15 *Hepatol* 2018;68(3):402-11. doi: 10.1016/j.jhep.2017.10.010 [published Online First:
- 16 2017/10/31]
- 17 55. Schulkind J, Stephens B, Ahmad F, et al. High response and re-infection rates among people who
- 18 inject drugs treated for hepatitis C in a community needle and syringe programme. *Journal*
- 19 *of Viral Hepatitis* 2018 doi: 10.1111/jvh.13035
- 20 56. MacArthur GJ, Minozzi S, Martin N, et al. Opiate substitution treatment and HIV transmission in
- 21 people who inject drugs: systematic review and meta-analysis. *BMJ* 2012;345:e5945.
- 22 57. MacArthur GJ, van VE, Palmateer N, et al. Interventions to prevent HIV and Hepatitis C in people
- 23 who inject drugs: A review of reviews to assess evidence of effectiveness. *IntJ Drug Policy*
- 24 2013 doi: S0955-3959(13)00116-3 [pii];10.1016/j.drugpo.2013.07.001 [doi]
- 25 58. Palmateer N, Hutchinson S, McAllister G, et al. Risk of transmission associated with sharing drug
- 26 injecting paraphernalia: analysis of recent hepatitis C virus (HCV) infection using cross-
- 27 sectional survey data. *J Viral Hepat* 2014;21(1):25-32. doi: 10.1111/jvh.12117
- 28 59. Palmateer N, Kimber J, Hickman M, et al. Evidence for the effectiveness of sterile injecting
- 29 equipment provision in preventing hepatitis C and human immunodeficiency virus
- 30 transmission among injecting drug users: a review of reviews. *Addiction* 2010;105(5):844-59.
- 31 doi: ADD2888 [pii];10.1111/j.1360-0443.2009.02888.x [doi]
- 32 60. Presanis AM, Gill ON, Chadborn TR, et al. Insights into the rise in HIV infections, 2001 to 2008: a
- 33 Bayesian synthesis of prevalence evidence. *AIDS* 2010;24(18):2849-58. doi:
- 34 10.1097/QAD.0b013e32834021ed [doi]
- 35 61. England PH. Hepatitis C in the UK 2016 report: Working towards its elimination as a major public
- 36 health threat. In: Harris HE, ed. London: Public Health England, 2016.
- 37 62. Health Protection Scotland UotWoS, Glasgow Caledonian University and the West of Scotland
- 38 Specialist Virology Centre. The Needle Exchange Surveillance Initiative: Prevalence of blood-
- 39 borne viruses and injecting risk behaviours among people who inject drugs attending
- 40 injecting equipment provision services in Scotland, 2008-09 to 2015-16. In: Scotland HP, ed.
- 41 Glasgow, 2017.
- 42 63. Brant LJ, Hurrelle M, Balogun MA, et al. Sentinel laboratory surveillance of hepatitis C antibody
- 43 testing in England: understanding the epidemiology of HCV infection. *Epidemiol Infect*
- 44 2007;135(3):417-26. doi: 10.1017/S0950268806006832
- 45 64. Brant LJ, Hurrelle M, Balogun MA, et al. Where are people being tested for anti-HCV in England?
- 46 Results from sentinel laboratory surveillance. *J Viral Hepat* 2008;15(10):729-39. doi:
- 47 10.1111/j.1365-2893.2008.01000.x
- 48 65. Lattimore S, Irving W, Collins S, et al. Using surveillance data to determine treatment rates and
- 49 outcomes for patients with chronic hepatitis C virus infection. *Hepatology* 2014;59(4):1343-
- 50 50. doi: 10.1002/hep.26926
- 51 66. Treloar C, Newland J, Rance J, et al. Uptake and delivery of hepatitis C treatment in opiate
- 52 substitution treatment: perceptions of clients and health professionals. *J Viral Hepat*
- 53 2010;17(12):839-44. doi: JVH1250 [pii];10.1111/j.1365-2893.2009.01250.x [doi]
- 54
- 55
- 56
- 57
- 58
- 59
- 60

ISRCTN72038467

- 1  
2  
3  
4 67. Treloar C, Rance J, Dore GJ, et al. Barriers and facilitators for assessment and treatment of  
5 hepatitis C virus infection in the opioid substitution treatment setting: insights from the  
6 ETHOS study. *J Viral Hepat* 2014;21(8):560-7. doi: 10.1111/jvh.12183
- 7 68. Harris M, Rhodes T. Hepatitis C treatment access and uptake for people who inject drugs: a  
8 review mapping the role of social factors. *Harm Reduct J* 2013;10:7. doi: 10.1186/1477-  
9 7517-10-7
- 10 69. Swan D, Long J, Carr O, et al. Barriers to and facilitators of hepatitis C testing, management, and  
11 treatment among current and former injecting drug users: a qualitative exploration. *AIDS*  
12 *Patient Care STDS* 2010;24(12):753-62. doi: 10.1089/apc.2010.0142
- 13 70. Rhodes T, Harris M, Martin A. Negotiating access to medical treatment and the making of patient  
14 citizenship: the case of hepatitis C treatment. *Sociol Health Illn* 2013;35(7):1023-44. doi:  
15 10.1111/1467-9566.12018
- 16 71. Harris M, Albers E, Swan T. The promise of treatment as prevention for hepatitis C: Meeting the  
17 needs of people who inject drugs? *Int J Drug Policy* 2015;26(10):963-9. doi:  
18 10.1016/j.drugpo.2015.05.005
- 19 72. Rance J, Treloar C, Group ES. 'Not just methadone Tracy': transformations in service-user identity  
20 following the introduction of hepatitis C treatment into Australian opiate substitution  
21 settings. *Addiction* 2014;109(3):452-9.
- 22 73. Treloar C, Rance J, Backmund M. Understanding barriers to hepatitis C virus care and  
23 stigmatization from a social perspective. *Clin Infect Dis* 2013;57 Suppl 2:S51-5. doi:  
24 10.1093/cid/cit263
- 25 74. Treloar C, Rance J, Bryant J, et al. Harm reduction workers and the challenge of engaging couples  
26 who inject drugs in hepatitis C prevention. *Drug Alcohol Depend* 2016;168:170-75. doi:  
27 10.1016/j.drugalcdep.2016.09.010
- 28 75. Treloar C, Rance J, Bryant J, et al. Understanding decisions made about hepatitis C treatment by  
29 couples who inject drugs. *J Viral Hepat* 2016;23(2):89-95. doi: 10.1111/jvh.12451
- 30 76. Jack K, Islip N, Linsley P, et al. Prison officers' views about hepatitis C testing and treatment: A  
31 qualitative enquiry. *J Clin Nurs* 2016 doi: 10.1111/jocn.13489
- 32 77. Rich ZC, Chu C, Mao J, et al. Facilitators of HCV treatment adherence among people who inject  
33 drugs: a systematic qualitative review and implications for scale up of direct acting antivirals.  
34 *BMC Public Health* 2016;16:994. doi: 10.1186/s12889-016-3671-z
- 35 78. Clark JA, Gifford AL. Resolute efforts to cure hepatitis C: Understanding patients' reasons for  
36 completing antiviral treatment. *Health (London)* 2015;19(5):473-89. doi:  
37 10.1177/1363459314555237
- 38 79. Batchelder AW, Peyser D, Nahvi S, et al. "Hepatitis C treatment turned me around:" Psychological  
39 and behavioral transformation related to hepatitis C treatment. *Drug Alcohol Depend*  
40 2015;153:66-71. doi: 10.1016/j.drugalcdep.2015.06.007
- 41 80. Harris M. Managing expense and expectation in a treatment revolution: Problematizing  
42 prioritisation through an exploration of hepatitis C treatment 'benefit'. *Int J Drug Policy*  
43 2017;47:161-68. doi: 10.1016/j.drugpo.2017.03.015 [published Online First: 2017/04/30]
- 44 81. Aspinall EJ, Hutchinson SJ, Janjua NZ, et al. Trends in mortality after diagnosis of hepatitis C virus  
45 infection: an international comparison and implications for monitoring the population  
46 impact of treatment. *J Hepatol* 2015;62(2):269-77. doi: 10.1016/j.jhep.2014.09.001
- 47 82. Aspinall EJ, Corson S, Doyle JS, et al. Treatment of hepatitis C virus infection among people who  
48 are actively injecting drugs: a systematic review and meta-analysis. *Clin Infect Dis* 2013;57  
49 Suppl 2:S80-9. doi: 10.1093/cid/cit306
- 50 83. Judd A, Parry J, Hickman M, et al. Evaluation of a modified commercial assay in detecting  
51 antibody to hepatitis C virus in oral fluids and dried blood spots. *J Med Virol* 2003;71(1):49-  
52 55.  
53  
54  
55  
56  
57  
58  
59  
60

ISRCTN72038467

- 1  
2  
3  
4  
5  
6  
7  
8  
9  
10  
11  
12  
13  
14  
15  
16  
17  
18  
19  
20  
21  
22  
23  
24  
25  
26  
27  
28  
29  
30  
31  
32  
33  
34  
35  
36  
37  
38  
39  
40  
41  
42  
43  
44  
45  
46  
47  
48  
49  
50  
51  
52  
53  
54  
55  
56  
57  
58  
59  
60
84. Bennett S, Gunson RN, McAllister GE, et al. Detection of hepatitis C virus RNA in dried blood spots. *J Clin Virol* 2012;54(2):106-09. doi: S1386-6532(12)00053-4 [pii];10.1016/j.jcv.2012.02.004 [doi]
  85. Martin NK, Vickerman P, Brew IF, et al. Is increased hepatitis C virus case-finding combined with current or 8-week to 12-week direct-acting antiviral therapy cost-effective in UK prisons? A prevention benefit analysis. *Hepatology* 2016;63(6):1796-808. doi: 10.1002/hep.28497
  86. McDonald SA, Innes HA, Hayes PC, et al. What is the impact of a country-wide scale-up in antiviral therapy on the characteristics and sustained viral response rates of patients treated for hepatitis C? *J Hepatol* 2015;62(2):262-8. doi: 10.1016/j.jhep.2014.08.046 [published Online First: 2014/09/10]
  87. Ward Z, Platt L, Sweeney S, et al. Impact of current and scaled-up levels of hepatitis C prevention and treatment interventions for people who inject drugs in three UK settings-what is required to achieve the WHO's HCV elimination targets? *Addiction* 2018 doi: 10.1111/add.14217 [published Online First: 2018/05/19]
  88. Brodersen KH, Gallusser F, Koehler J, et al. Inferring causal impact using Bayesian structural time-series models. 2015:247-74. doi: 10.1214/14-AOAS788
  89. Scott S VH. Predicting the present with bayesian structural time series. *International Journal of Mathematical Modelling and Numerical Optimisation* 2014;2014(5):23.
  90. Rance J, Newland J, Hopwood M, et al. The politics of place(ment): problematising the provision of hepatitis C treatment within opiate substitution clinics. *Soc Sci Med* 2012;74(2):245-53. doi: S0277-9536(11)00644-7 [pii];10.1016/j.socscimed.2011.10.003 [doi]
  91. Lankenau SE, Sanders B, Hathazi D, et al. Recruiting and retaining mobile young injection drug users in a longitudinal study. *Subst Use Misuse* 2010;45(5):684-99. doi: 10.3109/10826081003594914
  92. Stewart KE, Wright PB, Sims D, et al. The "translators": engaging former drug users as key research staff to design and implement a risk reduction program for rural cocaine users. *Subst Use Misuse* 2012;47(5):547-54. doi: 10.3109/10826084.2011.644379
  93. Harris M. "Three in the Room": Embodiment, Disclosure, and Vulnerability in Qualitative Research. *Qual Health Res* 2015;25(12):1689-99. doi: 10.1177/1049732314566324
  94. Braun V, Clarke V. Using thematic analysis in psychology. *Qualitative Research in Psychology* 2006;3(2):77-101. doi: 10.1191/1478088706qp063oa
  95. Rogers EM. Diffusion of preventive innovations. *Addict Behav* 2002;27(6):989-93.
  96. Cane J, O'Connor D, Michie S. Validation of the theoretical domains framework for use in behaviour change and implementation research. *Implement Sci* 2012;7:37. doi: 10.1186/1748-5908-7-37
  97. Innes HA, Hutchinson SJ, Allen S, et al. Ranking predictors of a sustained viral response for patients with chronic hepatitis C treated with pegylated interferon and ribavirin in Scotland. *Eur J Gastroenterol Hepatol* 2012;24(6):646-55. doi: 10.1097/MEG.0b013e32835201a4
  98. McDonald SA, Hutchinson SJ, Bird SM, et al. Excess morbidity in the hepatitis C-diagnosed population in Scotland, 1991-2006. *Epidemiol Infect* 2011;139(3):344-53. doi: 10.1017/S0950268810001421
  99. McDonald SA, Hutchinson SJ, Bird SM, et al. A record-linkage study of the development of hepatocellular carcinoma in persons with hepatitis C infection in Scotland. *Br J Cancer* 2008;99(5):805-10.
  100. McDonald SA, Hutchinson SJ, Bird SM, et al. A population-based record linkage study of mortality in hepatitis C-diagnosed persons with or without HIV coinfection in Scotland. *Stat Methods Med Res* 2009;18(3):271-83. doi: 10.1177/0962280208094690
  101. Gao L, Dimitropoulou P, Robertson JR, et al. Risk-factors for methadone-specific deaths in Scotland's methadone-prescription clients between 2009 and 2013. *Drug Alcohol Depend* 2016;167:214-23. doi: 10.1016/j.drugalcdep.2016.08.627

ISRCTN72038467

- 1  
2  
3  
4  
5  
6  
7  
8  
9  
10  
11  
12  
13  
14  
15  
16  
17  
18  
19  
20  
21  
22  
23  
24  
25  
26  
27  
28  
29  
30  
31  
32  
33  
34  
35  
36  
37  
38  
39  
40  
41  
42  
43  
44  
45  
46  
47  
48  
49  
50  
51  
52  
53  
54  
55  
56  
57  
58  
59  
60
102. Bird SM, Fischbacher CM, Graham L, et al. Impact of opioid substitution therapy for Scotland's prisoners on drug-related deaths soon after prisoner release. *Addiction* 2015;110(10):1617-24. doi: 10.1111/add.12969
  103. Bird SM, Hutchinson SJ. Male drugs-related deaths in the fortnight after release from prison: Scotland, 1996-99. *Addiction* 2003;98(2):185-90.
  104. Alvarez-Madrado S, McTaggart S, Nangle C, et al. Data Resource Profile: The Scottish National Prescribing Information System (PIS). *Int J Epidemiol* 2016;45(3):714-15f. doi: 10.1093/ije/dyw060
  105. Graham L, Fischbacher CM, Stockton D, et al. Understanding extreme mortality among prisoners: a national cohort study in Scotland using data linkage. *Eur J Public Health* 2015;25(5):879-85. doi: 10.1093/eurpub/cku252
  106. Merrall EL, Bird SM, Hutchinson SJ. Mortality of those who attended drug services in Scotland 1996-2006: record-linkage study. *Int J Drug Policy* 2012;23(1):24-32. doi: 10.1016/j.drugpo.2011.05.010
  107. McDonald SA, Hutchinson SJ, Bird SM, et al. Hospitalisation for an alcohol-related cause among injecting drug users in Scotland: increased risk following diagnosis with hepatitis C infection. *Int J Drug Policy* 2011;22(1):63-9. doi: 10.1016/j.drugpo.2010.04.003
  108. de Vos AS, Prins M, Kretzschmar ME. Hepatitis C virus treatment as prevention among injecting drug users: who should we cure first? *Addiction* 2015;110(6):975-83. doi: 10.1111/add.12842
  109. Boily MC, Lowndes CM, Vickerman P, et al. Evaluating large-scale HIV prevention interventions: study design for an integrated mathematical modelling approach. *Sex Transm Infect* 2007;83(7):582-89. doi: sti.2007.027516 [pii];10.1136/sti.2007.027516 [doi]
  110. Boily MC, Pickles M, Lowndes CM, et al. Positive impact of a large-scale HIV prevention program among female sex workers and clients in Karnataka state, India. *AIDS* 2013 doi: 10.1097/QAD.0b013e32835fba81 [doi]
  111. Hallett TB, Gregson S, Mugurungi O, et al. Assessing evidence for behaviour change affecting the course of HIV epidemics: a new mathematical modelling approach and application to data from Zimbabwe. *Epidemics* 2009;1(2):108-17. doi: 10.1016/j.epidem.2009.03.001
  112. Pickles M, Boily MC, Vickerman P, et al. Assessment of the population-level effectiveness of the Avahan HIV-prevention programme in South India: a preplanned, causal-pathway-based modelling analysis. *Lancet Glob Health* 2013;1(5):e289-99. doi: 10.1016/S2214-109X(13)70083-4
  113. Martin NK, Hickman M, Miners A, et al. Cost-effectiveness of HCV case-finding for people who inject drugs via dried blood spot testing in specialist addiction services and prisons. *BMJ open* 2013;3(8) doi: 10.1136/bmjopen-2013-003153
  114. Martin NK, Miners A, Vickerman P. Assessing the cost-effectiveness of interventions aimed at promoting and offering hepatitis C testing to injecting drug users: An economic modelling report. London, 2012.
  115. Martin NK, Pitcher AB, Vickerman P, et al. Optimal control of hepatitis C antiviral treatment programme delivery for prevention amongst a population of injecting drug users. *PLoS One* 2011;6(8):e22309. doi: 10.1371/journal.pone.0022309 [doi];PONE-D-10-01568 [pii]
  116. Martin NK, Vickerman P, Miners A, et al. The cost-effectiveness of HCV antiviral treatment for injecting drug user populations. *Hepatology* 2012;55(1):49-57. doi: 10.1002/hep.24656 [doi]
  117. Martin NK, Vickerman P, Miners A, et al. How cost-effective is hepatitis C virus treatment for people who inject drugs? *Journal of gastroenterology and hepatology* 2013;28(4):590-2. doi: 10.1111/jgh.12113
  118. Kimber J, Copeland L, Hickman M, et al. Survival and cessation in injecting drug users: prospective observational study of outcomes and effect of opiate substitution treatment. *BMJ* 2010;341:c3172.
  119. McDonald SA, Hutchinson SJ, Palmateer NE, et al. Decrease in health-related quality of life associated with awareness of hepatitis C virus infection among people who inject drugs in

ISRCTN72038467

- 1  
2  
3 Scotland. *JHepatol* 2013;58(3):460-66. doi: S0168-8278(12)00836-7  
4 [pii];10.1016/j.jhep.2012.11.004 [doi]  
5  
6 120. Wright M, Grieve R, Roberts J, et al. Health benefits of antiviral therapy for mild chronic  
7 hepatitis C: randomised controlled trial and economic evaluation. *Health Technol Assess*  
8 2006;10(21):1-113, iii. doi: 95-24-03 [pii]  
9  
10 121. Harrison GI, Murray K, Gore R, et al. The Hepatitis C Awareness Through to Treatment  
11 (HepCATT) study: Improving the cascade of care for hepatitis C virus-infected people who  
12 inject drugs in England. *Addiction* 2019 doi: 10.1111/add.14569 [published Online First:  
13 2019/01/30]  
14  
15  
16  
17  
18  
19  
20  
21  
22  
23  
24  
25  
26  
27  
28  
29  
30  
31  
32  
33  
34  
35  
36  
37  
38  
39  
40  
41  
42  
43  
44  
45  
46  
47  
48  
49  
50  
51  
52  
53  
54  
55  
56  
57  
58  
59  
60

For peer review only



PWID defined as those who either (a) are currently injecting drugs, (b) have ever injected drugs and are currently on opioid substitute therapy, or (c) have ever injected drugs and are currently in prison

DBS: dried blood spot; OST: opioid substitution therapies; PWID: people who inject drugs

Peer review only







view only

1  
2  
3  
4  
5  
6  
7  
8  
9  
10  
11  
12  
13  
14  
15  
16  
17  
18  
19  
20  
21  
22  
23  
24  
25  
26  
27  
28  
29  
30  
31  
32  
33  
34  
35  
36  
37  
38  
39  
40  
41  
42  
43  
44  
45  
46



Reduction 10%–20%–20%



Reduction 20%–40%–40%





Supplement: bmjopen-2019-029538.draft_revisions.pdf [file bmjopen-2019-029538.draft_revisions.pdf]
